# Supplementary material for: Novel curcumin-based analogues as potential VEGFR2 inhibitors with promising metallic loading nanoparticles: synthesis, biological evaluation, and molecular modelling investigation
Source: Royal Society of Chemistry journal article supplement (doi:10.1039/d4md00574k), 2024-01-01
Supplement: d4md00574k1.pdf [file d4md00574k1.pdf]

## Novel Curcumin-based Analogues as Potential VEGFR2 Inhibitors with Promising Metallic Loading Nanoparticles: Synthesis, Biological Evaluation, and Molecular Modelling Investigation

Asmaa S. A. Yassen<sup>1,2,\*</sup>, Sherief M. Abdel-Wahab<sup>3,\*</sup>, Khaled M. Darwish<sup>4,2</sup>, Mohamed S. Nafie<sup>5,6</sup>, Reda F. A. Abdelhameed<sup>7,8</sup>, Gharieb S. El-Sayyad<sup>9,10</sup>, Ahmed I. El-Batal<sup>10</sup>, Khadiga M. Attia<sup>3</sup>, Hosam A. Elshihawy<sup>1</sup>, Ranza A. Elrayess<sup>1</sup>

<sup>1</sup>Pharmaceutical Organic Chemistry Department, Faculty of Pharmacy, Suez Canal University, Ismailia 41522, Egypt. ([Asmaa\\_yaseen@pharm.suez.edu.eg](mailto:Asmaa_yaseen@pharm.suez.edu.eg)), ([hossameldeen\\_ahmed@pharm.suez.edu.eg](mailto:hossameldeen_ahmed@pharm.suez.edu.eg)), ([ranza.el-rayes@pharm.suez.edu.eg](mailto:ranza.el-rayes@pharm.suez.edu.eg))

<sup>2</sup>Department of Medicinal Chemistry, Faculty of Pharmacy, Galala University, New Galala 43713, Egypt.

<sup>3</sup>Pharmaceutical Organic Chemistry Department, College of Pharmaceutical Sciences and Drug Manufacturing, Misr University for Science and Technology, Giza, Egypt. ([sherief.abdalwahab@must.edu.eg](mailto:sherief.abdalwahab@must.edu.eg)) ([Khadeja.attia@must.edu.eg](mailto:Khadeja.attia@must.edu.eg))

<sup>4</sup>Medicinal Chemistry Department, Faculty of Pharmacy, Suez Canal University, Ismailia 41522, Egypt. ([khaled\\_darwish@pharm.suez.edu.eg](mailto:khaled_darwish@pharm.suez.edu.eg))

<sup>5</sup>Department of Chemistry, College of Sciences, University of Sharjah (P.O. 27272), Sharjah, United Arab Emirates. ([Mohamed.ElSayed@sharjah.ac.ae](mailto:Mohamed.ElSayed@sharjah.ac.ae))

<sup>6</sup>Department of Chemistry, Faculty of Science, Suez Canal University, Ismailia 41522, Egypt. ([Mohamed\\_nafie@science.suez.edu.eg](mailto:Mohamed_nafie@science.suez.edu.eg))

<sup>7</sup>Department of Pharmacognosy, Faculty of Pharmacy, Galala University, New Galala City, Suez 43713, Egypt. ([reda.fouad@gu.edu.eg](mailto:reda.fouad@gu.edu.eg))

<sup>8</sup>Pharmacognosy Department, Faculty of Pharmacy, Suez Canal University, Ismailia 41522, Egypt.

<sup>9</sup>Microbiology and Immunology Department, Faculty of Pharmacy, Galala University, New Galala City, Suez 43713, Egypt. ([Gharieb.Elsayyad@gu.edu.eg](mailto:Gharieb.Elsayyad@gu.edu.eg))

<sup>10</sup>Drug Radiation Research Department, National Center for Radiation Research and Technology (NCRRT), Egyptian Atomic Energy Authority (EAEA), Cairo, Egypt. ([aelbatal2000@gmail.com](mailto:aelbatal2000@gmail.com))

### \*Corresponding authors:

**Asmaa S. A. Yassen:** Pharmaceutical Organic Chemistry Department, Faculty of Pharmacy, Suez Canal University, Ismailia 41522, Egypt; Email: [asmaa\\_yaseen@pharm.suez.edu.eg](mailto:asmaa_yaseen@pharm.suez.edu.eg)

**Sherief M. Abdel-Wahab:** Pharmaceutical Organic Chemistry Department, College of Pharmaceutical Sciences and Drug Manufacturing, Misr University for Science and Technology, Giza, Egypt; Email: [sherief.abdalwahab@must.edu.eg](mailto:sherief.abdalwahab@must.edu.eg)

## 2. Materials and Methods

### 2.1. Chemistry

### 2.1.1. Instrument

Melting points were measured with Gallenkamp melting point apparatus and were uncorrected. The structure of the target compounds was confirmed by IR (Pye-Unicam SP-3-300 infrared spectrophotometer, KBr disks),  $^1\text{H}$  NMR (400 MHz, Varian Mercury VX-300 and Bruker Avance III NMR spectrometer) and  $^{13}\text{C}$  NMR (100 MHz, BRUKERNMR spectrometer, BRUKER, Manufacturing & Engineering Inc., Anaheim, CA, USA). The abbreviations used are as follows: s, singlet; d, doublet; m, multiplet. The mass spectra (EI-MS) were recorded on a Shimadzu GCMSQP-1000EX mass spectrometer at 70 eV. UV fluorescent silica gel Merck 60 F254 plates were used to monitor the reactions and were visualized using a UV lamp.

### 2.1.2. Chemicals and Reagents

Aniline, 4-methoxy aniline, 4-chloro aniline, triethyl amine, chloroacetyl chloride, piperidine 4-one hydrochloride, 2-furaldehyde, benzaldehyde, 4-chloro benzaldehyde, 4-methoxy benzaldehyde, 3,4-dimethoxy benzaldehyde, 3,4,5 trimethoxy benzaldehyde, were purchased from Aldrich (USA). Solvents and other reagents were of pure grade and used without further purification.

### 3. Results and Discussion

#### 3.3. Molecular Modeling Investigation

Table S1. MM/GBSA binding energies and per-residue energy contributions for the hotspot VEGFR2 amino acids based on FastDRH server analysis.

| Ligand | MM_GBSA | Per-residue MM/GBSA energy contributions                                                            |
|--------|---------|-----------------------------------------------------------------------------------------------------|
| 4b     | -47.68  | 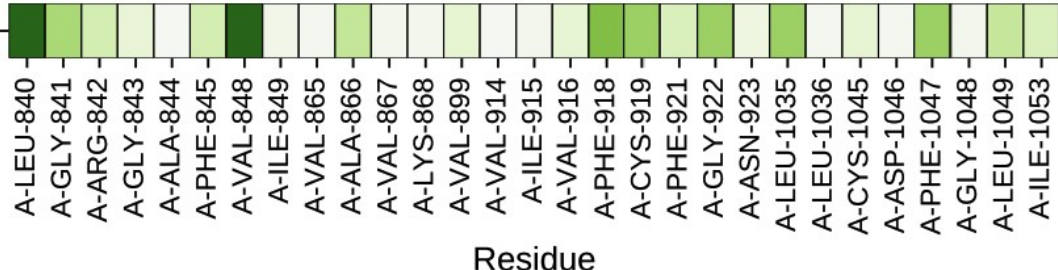 <p>Residue</p>   |
| 4d     | -55.92  |  <p>Residue</p>  |
| 4e     | -58.06  |  <p>Residue</p> |
| 4f     | -54.27  |  <p>Residue</p> |

|           |        |                                                                                                                      |
|-----------|--------|----------------------------------------------------------------------------------------------------------------------|
| Sorafenib | -63.15 | 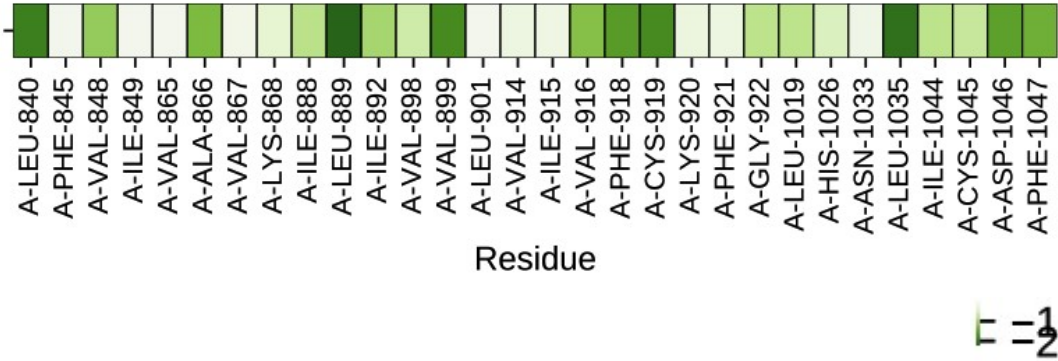 <p>Residue</p> <p>Legend: 1 2</p> |
|-----------|--------|----------------------------------------------------------------------------------------------------------------------|

**Table S2. Toxicity model report of compound 4e using ProTox 3.0 webserver**

[illegible]

## List of Supplementary Figures

|                                                                                  | Page No.  |
|----------------------------------------------------------------------------------|-----------|
| <b>Chemistry Supplementary Figures</b>                                           |           |
| <sup>1</sup> H-NMR and <sup>13</sup> C-NMR spectra                               |           |
| <b>Figure S1.</b> <sup>1</sup> H-NMR of compound <b>2a</b>                       | <b>8</b>  |
| <b>Figure S2.</b> <sup>1</sup> H-NMR of compound <b>2a</b> with D <sub>2</sub> O | <b>8</b>  |
| <b>Figure S3.</b> <sup>13</sup> C-NMR of compound <b>2a</b>                      | <b>9</b>  |
| <b>Figure S4.</b> <sup>1</sup> H-NMR of compound <b>2b</b>                       | <b>10</b> |
| <b>Figure S5.</b> <sup>13</sup> C-NMR of compound <b>2b</b>                      | <b>11</b> |
| <b>Figure S6.</b> <sup>1</sup> H-NMR of compound <b>2c</b>                       | <b>12</b> |
| <b>Figure S7.</b> <sup>13</sup> C-NMR of compound <b>2c</b>                      | <b>13</b> |
| <b>Figure S8.</b> <sup>1</sup> H-NMR of compound <b>4a</b>                       | <b>14</b> |
| <b>Figure S9.</b> <sup>13</sup> C-NMR of compound <b>4a</b>                      | <b>15</b> |
| <b>Figure S10.</b> <sup>1</sup> H-NMR of compound <b>4b</b>                      | <b>16</b> |
| <b>Figure S11.</b> <sup>13</sup> C-NMR of compound <b>4b</b>                     | <b>17</b> |
| <b>Figure S12.</b> <sup>1</sup> H-NMR of compound <b>4c</b>                      | <b>18</b> |
| <b>Figure S13.</b> <sup>13</sup> C-NMR of compound <b>4c</b>                     | <b>19</b> |
| <b>Figure S14.</b> <sup>1</sup> H-NMR of compound <b>4d</b>                      | <b>20</b> |
| <b>Figure S15.</b> <sup>13</sup> C-NMR of compound <b>4d</b>                     | <b>21</b> |
| <b>Figure S16.</b> <sup>1</sup> H-NMR of compound <b>4e</b>                      | <b>22</b> |
| <b>Figure S17.</b> <sup>13</sup> C-NMR of compound <b>4e</b>                     | <b>23</b> |
| <b>Figure S18.</b> <sup>1</sup> H-NMR of compound <b>4f</b>                      | <b>24</b> |
| <b>Figure S19.</b> <sup>13</sup> C-NMR of compound <b>4f</b>                     | <b>25</b> |
| <b>Figure S20.</b> <sup>1</sup> H-NMR of compound <b>4g</b>                      | <b>26</b> |
| <b>Figure S21.</b> <sup>13</sup> C-NMR of compound <b>4g</b>                     | <b>27</b> |
| <b>Figure S22.</b> <sup>1</sup> H-NMR of compound <b>4h</b>                      | <b>28</b> |
| <b>Figure S23.</b> <sup>13</sup> C-NMR of compound <b>4h</b>                     | <b>29</b> |
| <b>Figure S24.</b> <sup>1</sup> H-NMR of compound <b>4i</b>                      | <b>30</b> |
| <b>Figure S25.</b> <sup>13</sup> C-NMR of compound <b>4i</b>                     | <b>31</b> |
| <b>Figure S26.</b> <sup>1</sup> H-NMR of compound <b>4j</b>                      | <b>32</b> |
| <b>Figure S27.</b> <sup>13</sup> C-NMR of compound <b>4j</b>                     | <b>33</b> |
| <b>Figure S28.</b> <sup>1</sup> H-NMR of compound <b>4k</b>                      | <b>34</b> |
| <b>Figure S29.</b> <sup>13</sup> C-NMR of compound <b>4k</b>                     | <b>35</b> |
| <b>Figure S30.</b> <sup>1</sup> H-NMR of compound <b>4l</b>                      | <b>36</b> |
| <b>Figure S31.</b> <sup>13</sup> C-NMR of compound <b>4l</b>                     | <b>37</b> |
| <b>Figure S32.</b> <sup>1</sup> H-NMR of compound <b>4m</b>                      | <b>38</b> |
| <b>Figure S33.</b> <sup>13</sup> C-NMR of compound <b>4m</b>                     | <b>39</b> |
| <b>Figure S34.</b> <sup>1</sup> H-NMR of compound <b>4n</b>                      | <b>40</b> |
| <b>Figure S35.</b> <sup>13</sup> C-NMR of compound <b>4n</b>                     | <b>41</b> |
| <b>Figure S36.</b> <sup>1</sup> H-NMR of compound <b>4o</b>                      | <b>42</b> |
| <b>Figure S37.</b> <sup>13</sup> C-NMR of compound <b>4o</b>                     | <b>43</b> |
| <b>IR Spectra</b>                                                                |           |
| <b>Figure S38.</b> IR spectrum of compound <b>2a</b>                             | <b>44</b> |
| <b>Figure S39.</b> IR spectrum of compound <b>2b</b>                             | <b>45</b> |

|                                                                                                                                                                                                 |           |
|-------------------------------------------------------------------------------------------------------------------------------------------------------------------------------------------------|-----------|
| <b>Figure S40.</b> IR spectrum of compound <b>2c</b>                                                                                                                                            | <b>46</b> |
| <b>Figure S41.</b> IR spectrum of compound <b>4a</b>                                                                                                                                            | <b>47</b> |
| <b>Figure S42.</b> IR spectrum of compound <b>4b</b>                                                                                                                                            | <b>48</b> |
| <b>Figure S43.</b> IR spectrum of compound <b>4c</b>                                                                                                                                            | <b>49</b> |
| <b>Figure S44.</b> IR spectrum of compound <b>4d</b>                                                                                                                                            | <b>50</b> |
| <b>Figure S45.</b> IR spectrum of compound <b>4e</b>                                                                                                                                            | <b>51</b> |
| <b>Figure S46.</b> IR spectrum of compound <b>4f</b>                                                                                                                                            | <b>52</b> |
| <b>Figure S47.</b> IR spectrum of compound <b>4g</b>                                                                                                                                            | <b>53</b> |
| <b>Figure S48.</b> IR spectrum of compound <b>4h</b>                                                                                                                                            | <b>54</b> |
| <b>Figure S49.</b> IR spectrum of compound <b>4i</b>                                                                                                                                            | <b>55</b> |
| <b>Figure S50.</b> IR spectrum of compound <b>4j</b>                                                                                                                                            | <b>56</b> |
| <b>Figure S51.</b> IR spectrum of compound <b>4k</b>                                                                                                                                            | <b>57</b> |
| <b>Figure S52.</b> IR spectrum of compound <b>4l</b>                                                                                                                                            | <b>58</b> |
| <b>Figure S53.</b> IR spectrum of compound <b>4m</b>                                                                                                                                            | <b>59</b> |
| <b>Figure S54.</b> IR spectrum of compound <b>4n</b>                                                                                                                                            | <b>60</b> |
| <b>Figure S55.</b> IR spectrum of compound <b>4o</b>                                                                                                                                            | <b>61</b> |
| <b>Mass Spectra</b>                                                                                                                                                                             |           |
| <b>Figure S56.</b> Mass spectrum of compound <b>2a</b>                                                                                                                                          | <b>62</b> |
| <b>Figure S57.</b> Mass spectrum of compound <b>2b</b>                                                                                                                                          | <b>63</b> |
| <b>Figure S58.</b> Mass spectrum of compound <b>2c</b>                                                                                                                                          | <b>64</b> |
| <b>Figure S59.</b> Mass spectrum of compound <b>4a</b>                                                                                                                                          | <b>65</b> |
| <b>Figure S60.</b> Mass spectrum of compound <b>4b</b>                                                                                                                                          | <b>66</b> |
| <b>Figure S61.</b> Mass spectrum of compound <b>4c</b>                                                                                                                                          | <b>67</b> |
| <b>Figure S62.</b> Mass spectrum of compound <b>4d</b>                                                                                                                                          | <b>68</b> |
| <b>Figure S63.</b> Mass spectrum of compound <b>4e</b>                                                                                                                                          | <b>69</b> |
| <b>Figure S64.</b> Mass spectrum of compound <b>4f</b>                                                                                                                                          | <b>70</b> |
| <b>Figure S65.</b> Mass spectrum of compound <b>4g</b>                                                                                                                                          | <b>71</b> |
| <b>Figure S66.</b> Mass spectrum of compound <b>4h</b>                                                                                                                                          | <b>72</b> |
| <b>Figure S67.</b> Mass spectrum of compound <b>4i</b>                                                                                                                                          | <b>73</b> |
| <b>Figure S68.</b> Mass spectrum of compound <b>4j</b>                                                                                                                                          | <b>74</b> |
| <b>Figure S69.</b> Mass spectrum of compound <b>4k</b>                                                                                                                                          | <b>75</b> |
| <b>Figure S70.</b> Mass spectrum of compound <b>4l</b>                                                                                                                                          | <b>76</b> |
| <b>Figure S71.</b> Mass spectrum of compound <b>4m</b>                                                                                                                                          | <b>77</b> |
| <b>Figure S72.</b> Mass spectrum of compound <b>4n</b>                                                                                                                                          | <b>78</b> |
| <b>Figure S73.</b> Mass spectrum of compound <b>4o</b>                                                                                                                                          | <b>79</b> |
| <b>Molecular Docking Supplementary Figure</b>                                                                                                                                                   |           |
| <b>Figure S74.</b> Docking binding modes and overlay of <b>4e</b> , sorafenib, and curcumin                                                                                                     | <b>80</b> |
| <b>Biology Supplementary Figures</b>                                                                                                                                                            |           |
| <b>Figure S75.</b> IC <sub>50</sub> curves for all compounds on MCF-7 cell line                                                                                                                 | <b>81</b> |
| <b>Figure S76.</b> IC <sub>50</sub> curves for all compounds on HepG-2 cell line                                                                                                                | <b>81</b> |
| <b>Figure S77.</b> VEGFR2 Enzyme inhibition curves for compounds <b>4b</b> and <b>4d-f</b>                                                                                                      | <b>82</b> |
| <b>Nano Supplementary Figure</b>                                                                                                                                                                |           |
| <b>Figure S78.</b> Elemental analysis of the synthesized iron oxide nanocomposite; where (a) EDX of Fe <sub>2</sub> O <sub>3</sub> NPs-B, and (b) EDX of Fe <sub>2</sub> O <sub>3</sub> NPs-HA. | <b>83</b> |

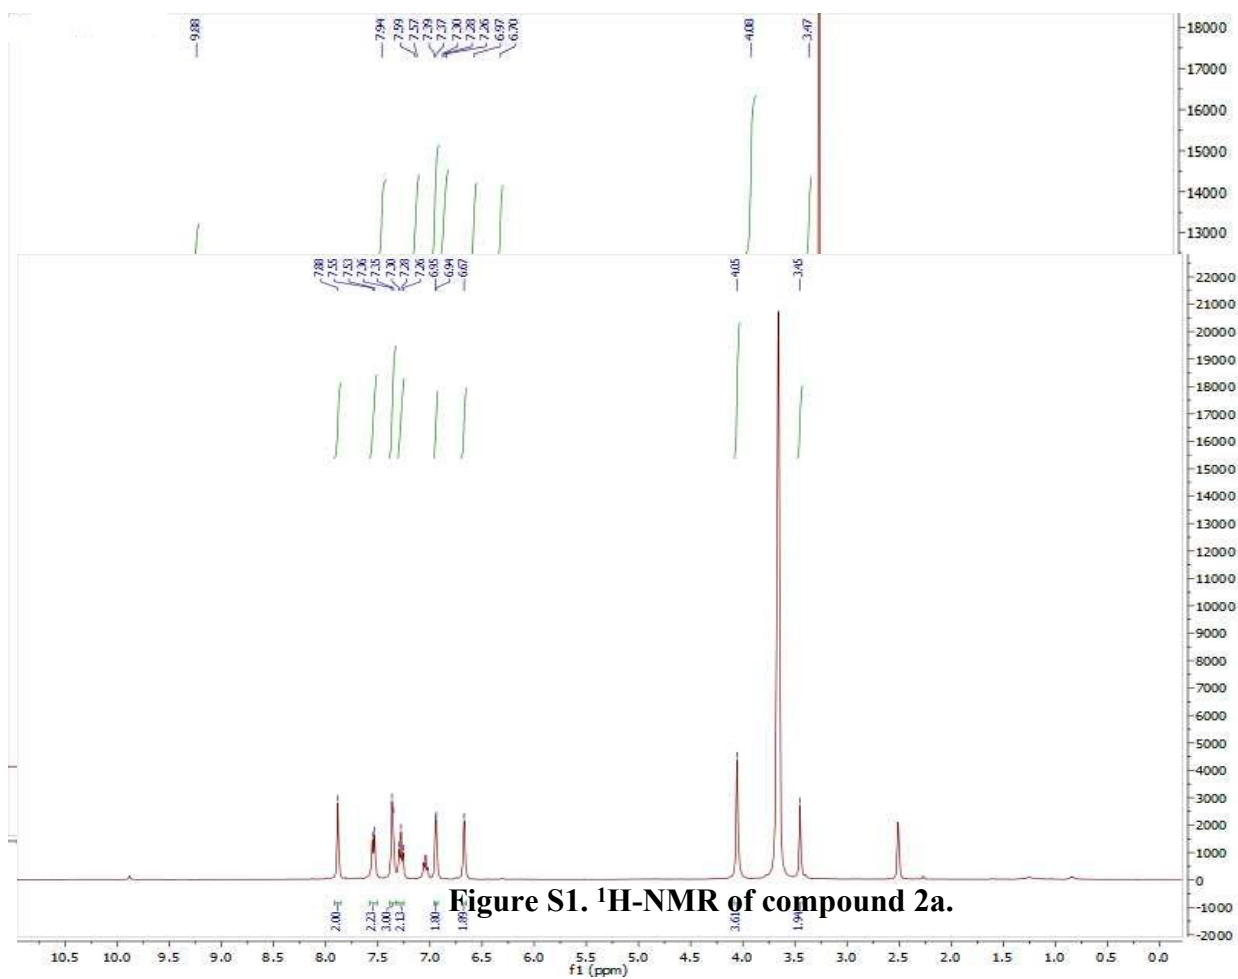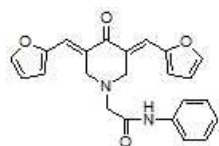

**Figure S2.  $^1\text{H}$ -NMR of compound 2a with  $\text{D}_2\text{O}$ .**



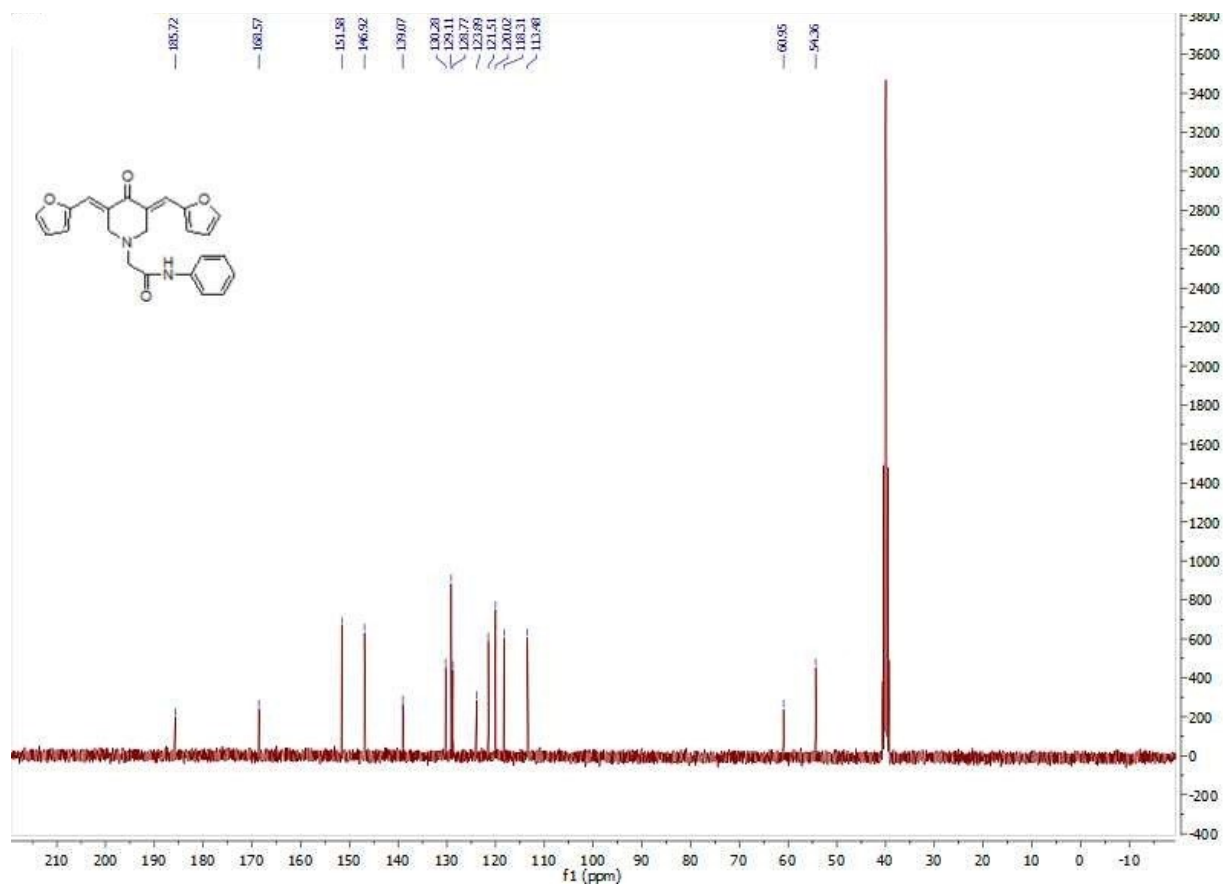

Figure S3. <sup>13</sup>C-NMR of compound 2a.

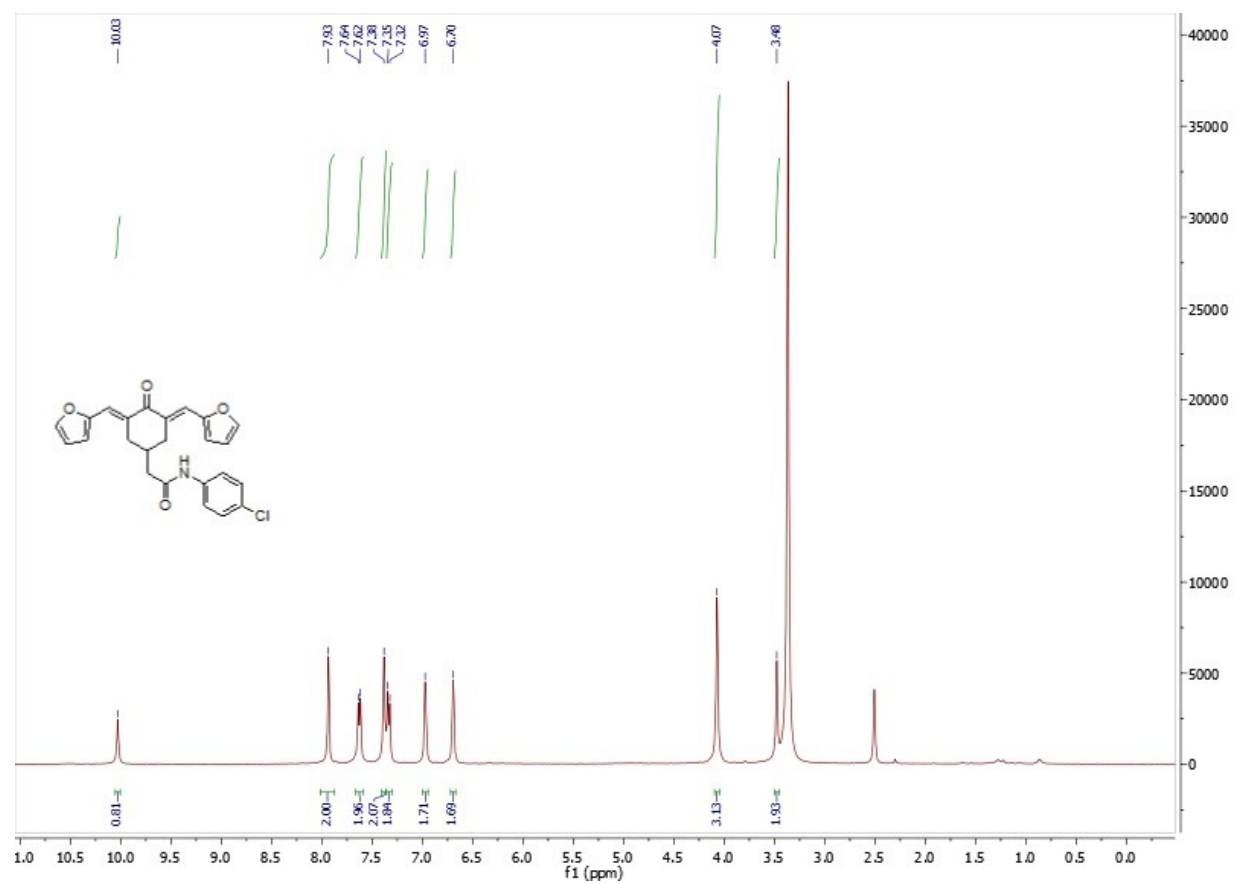

**Figure S4. <sup>1</sup>H-NMR of compound 2b.**

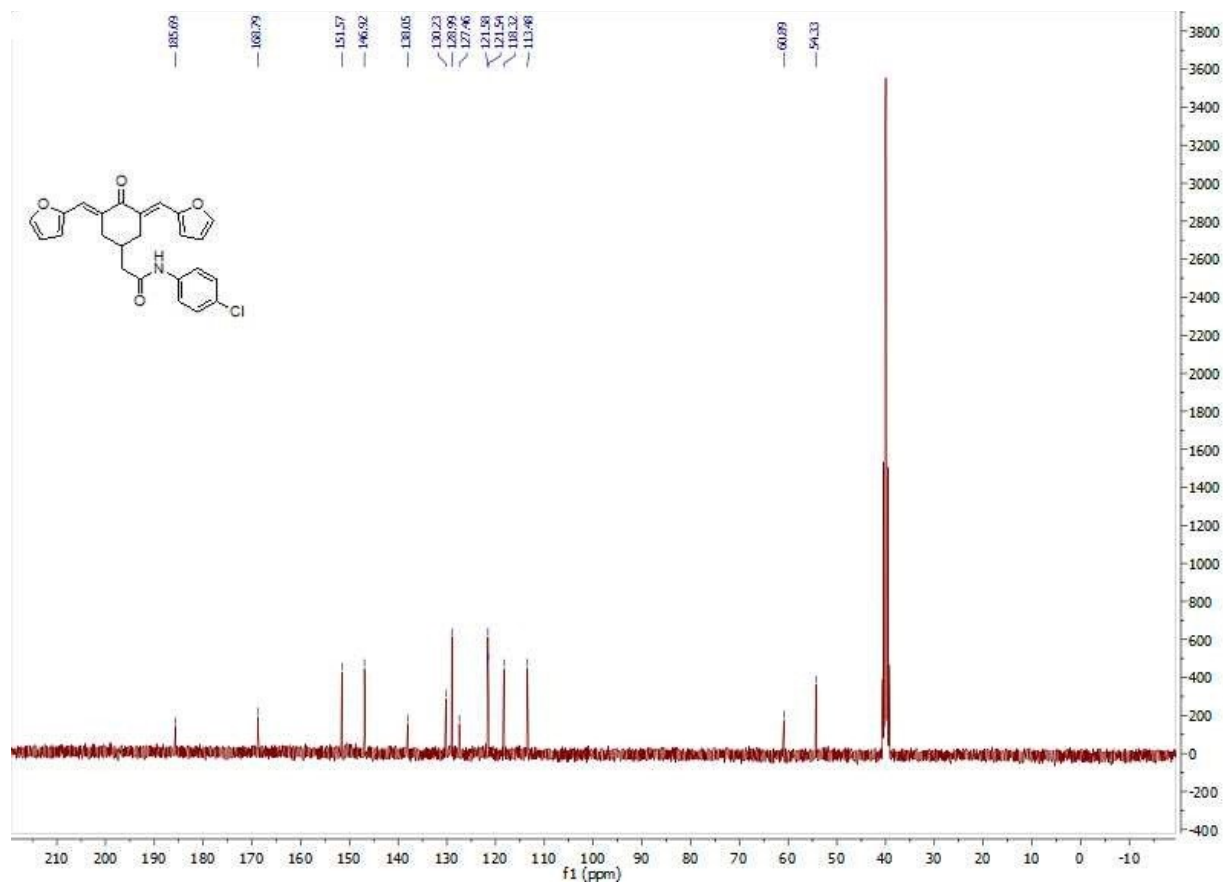

Figure S5.  $^{13}\text{C}$ -NMR of compound 2b.

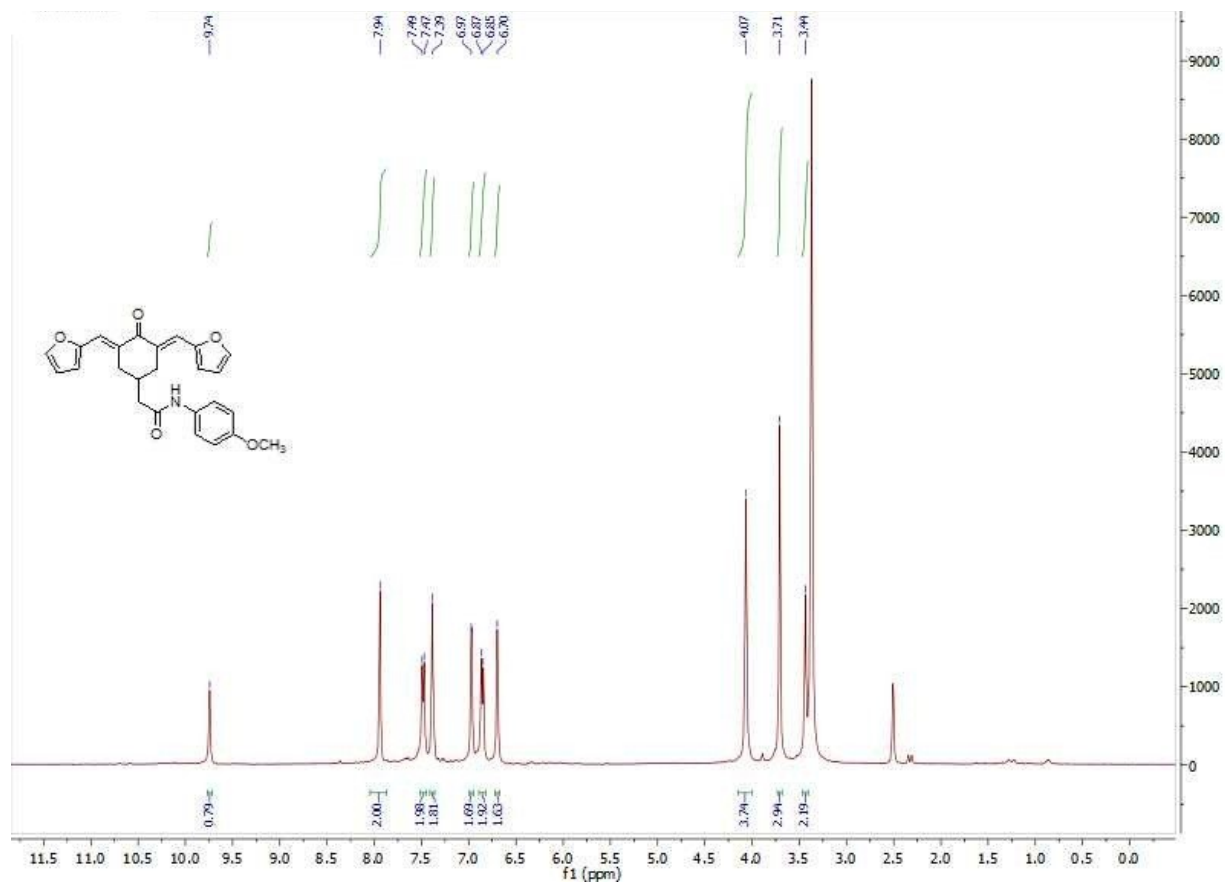

Figure S6. <sup>1</sup>H-NMR of compound 2c.

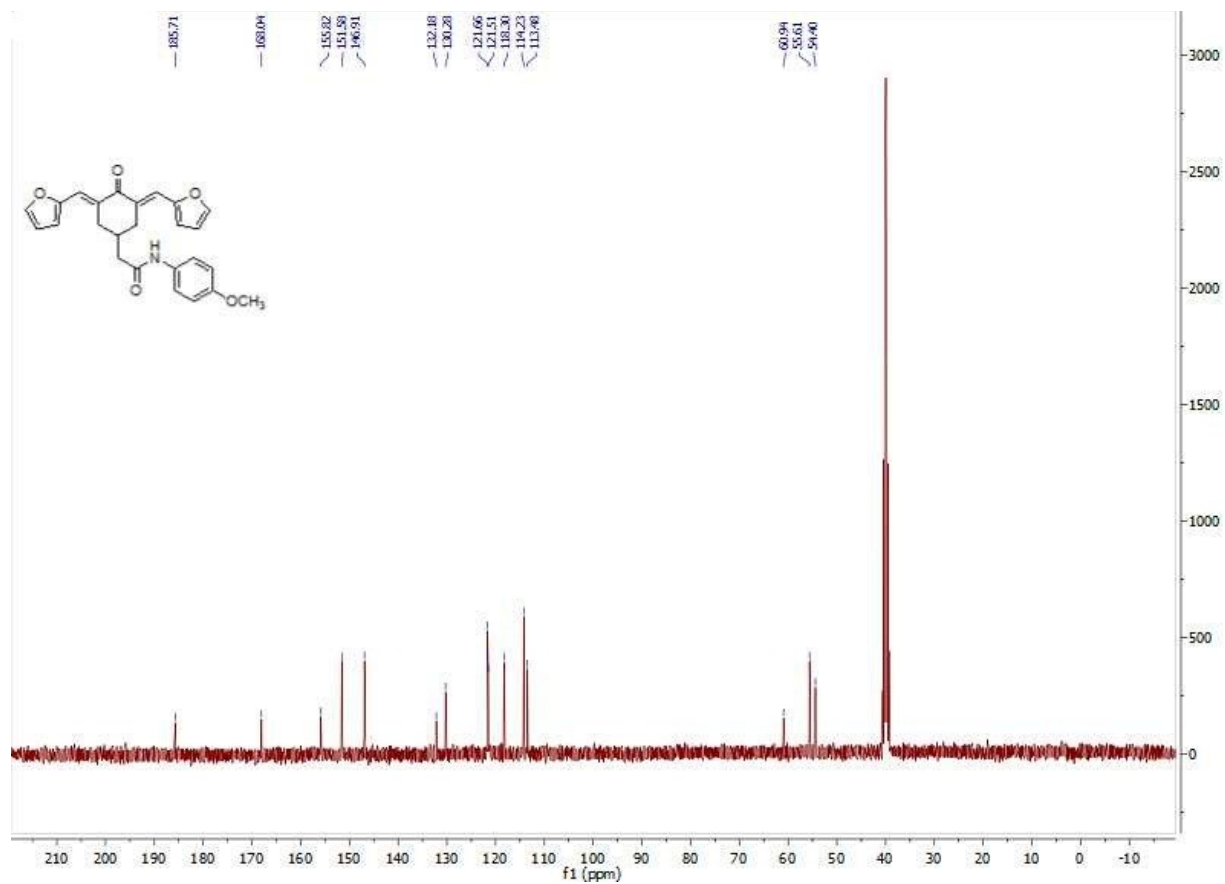

Figure S7. <sup>13</sup>C-NMR of compound 2c.

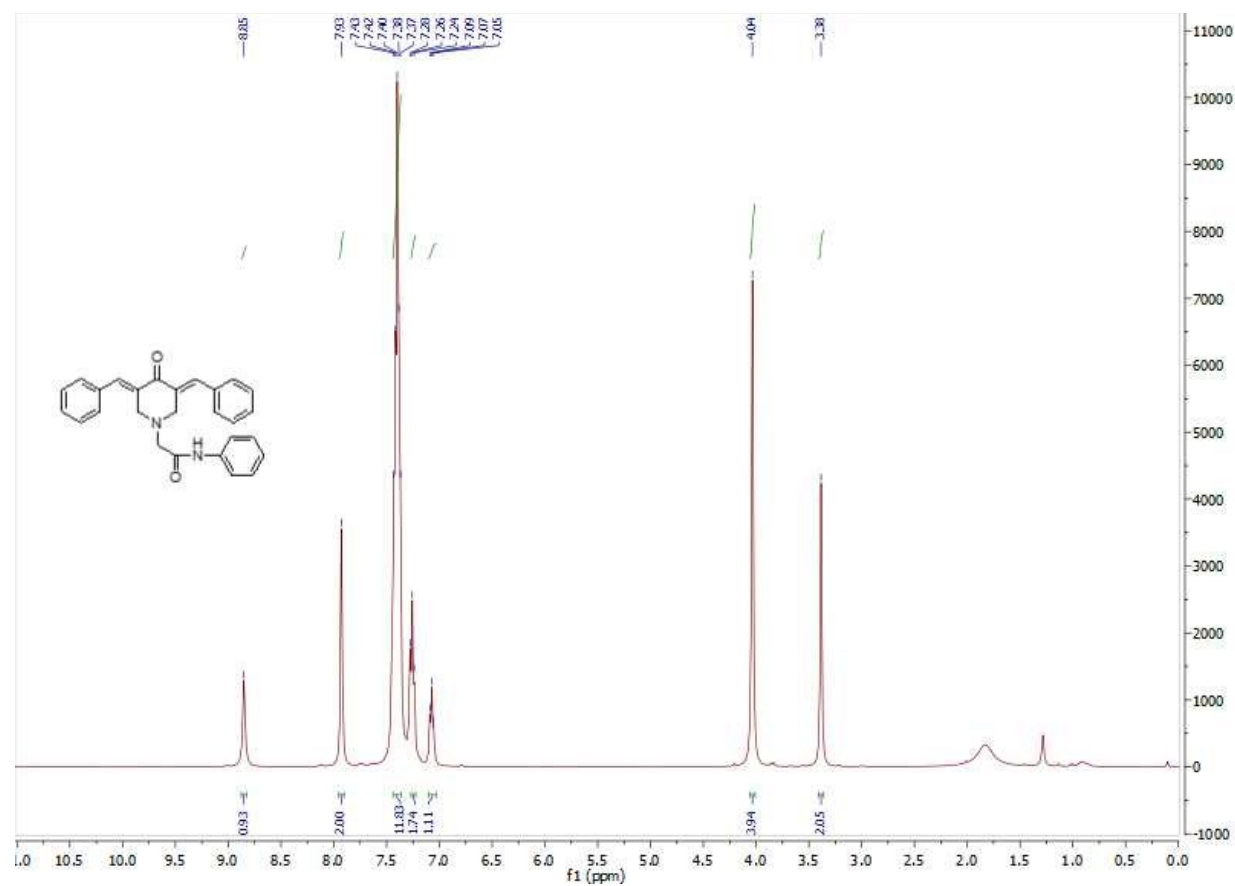

Figure S8. <sup>1</sup>H-NMR of compound 4a.

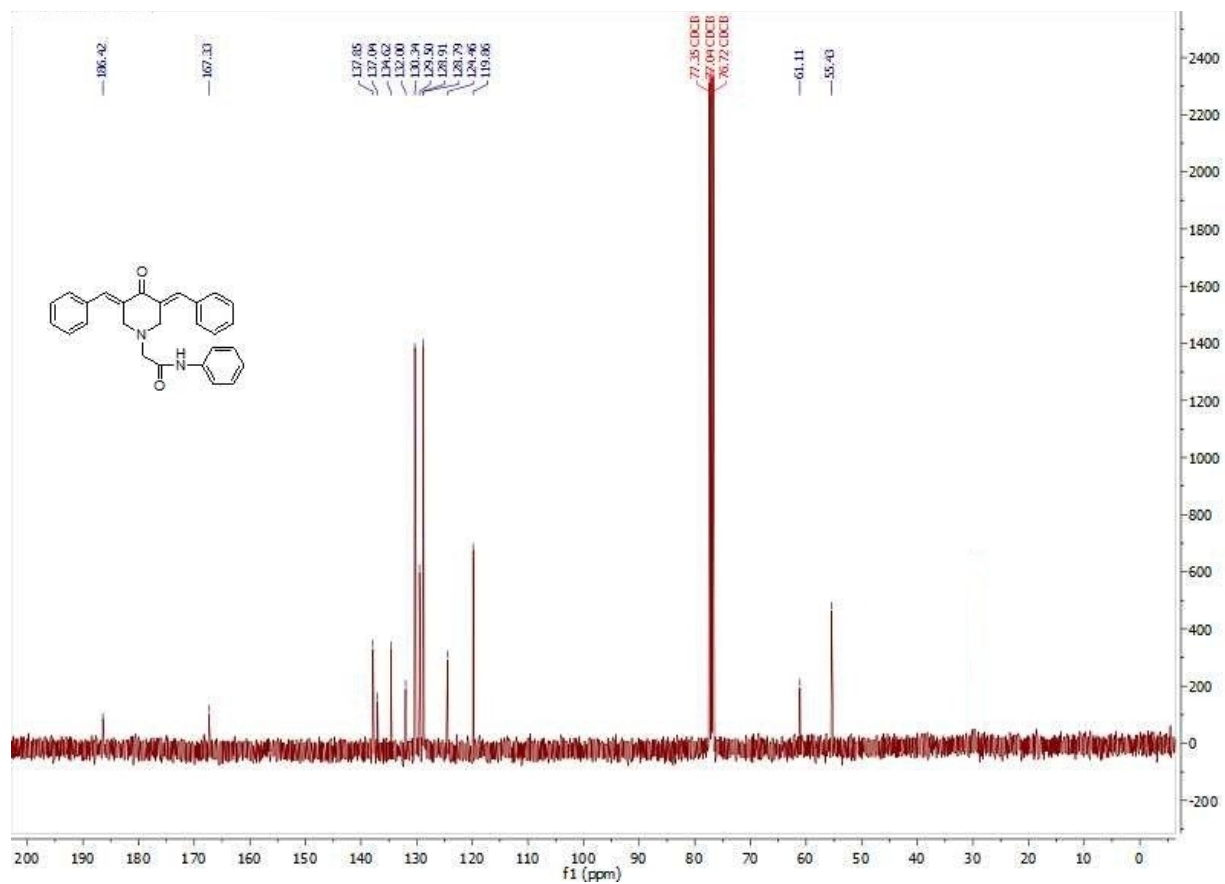

Figure S9. <sup>13</sup>C-NMR of compound 4a.

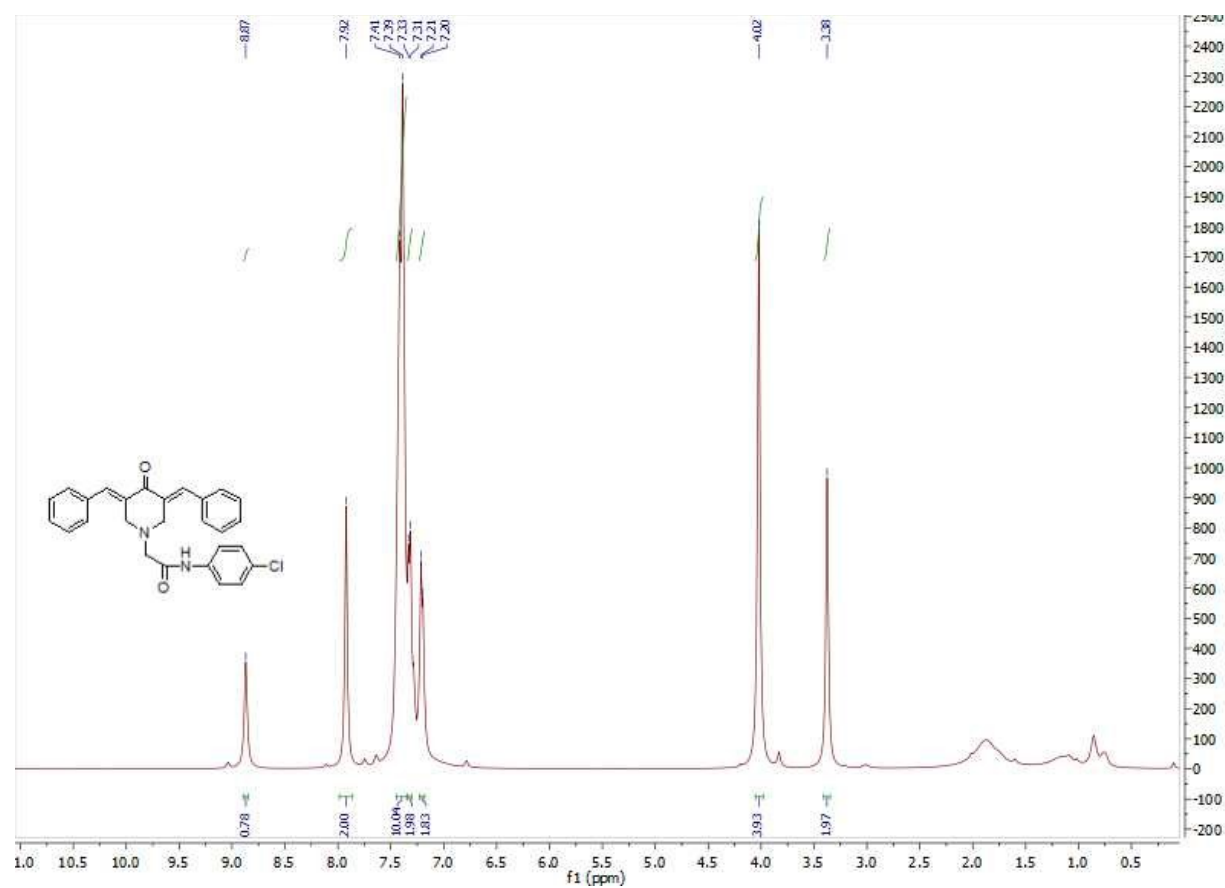

Figure S10. <sup>1</sup>H-NMR of compound 4b.



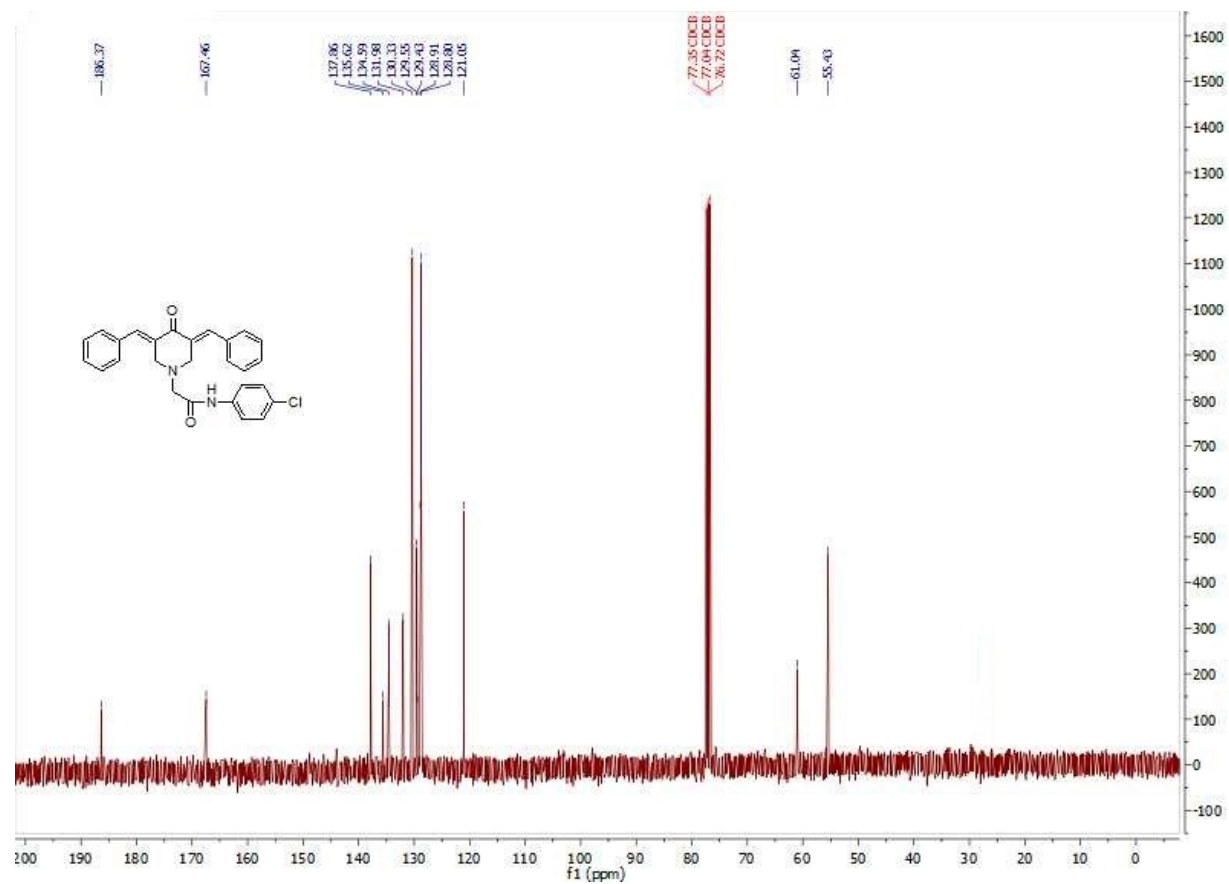

Figure S11. <sup>13</sup>C-NMR of compound 4b.

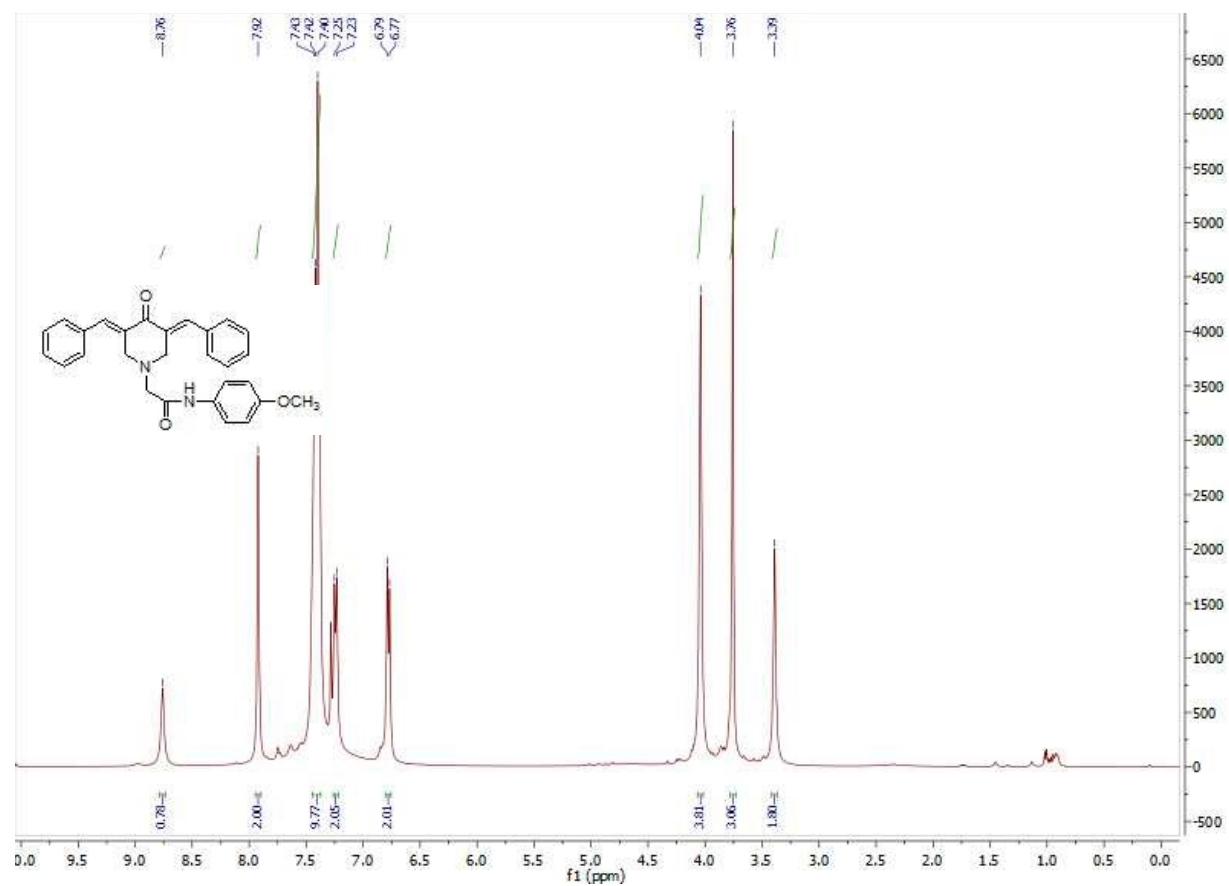

Figure S12. <sup>1</sup>H-NMR of compound 4c.

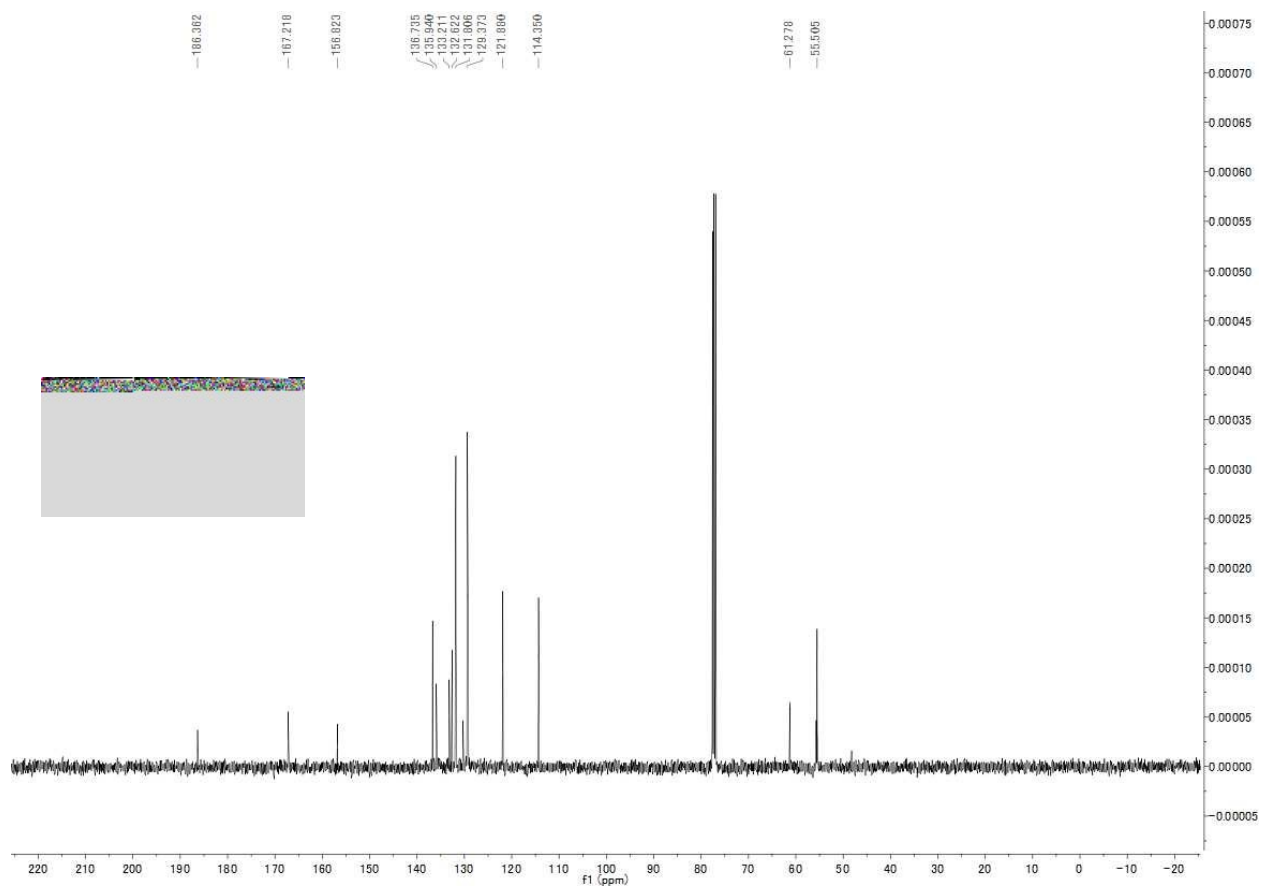

**Figure S13.** <sup>13</sup>CNMR of compound 4c.

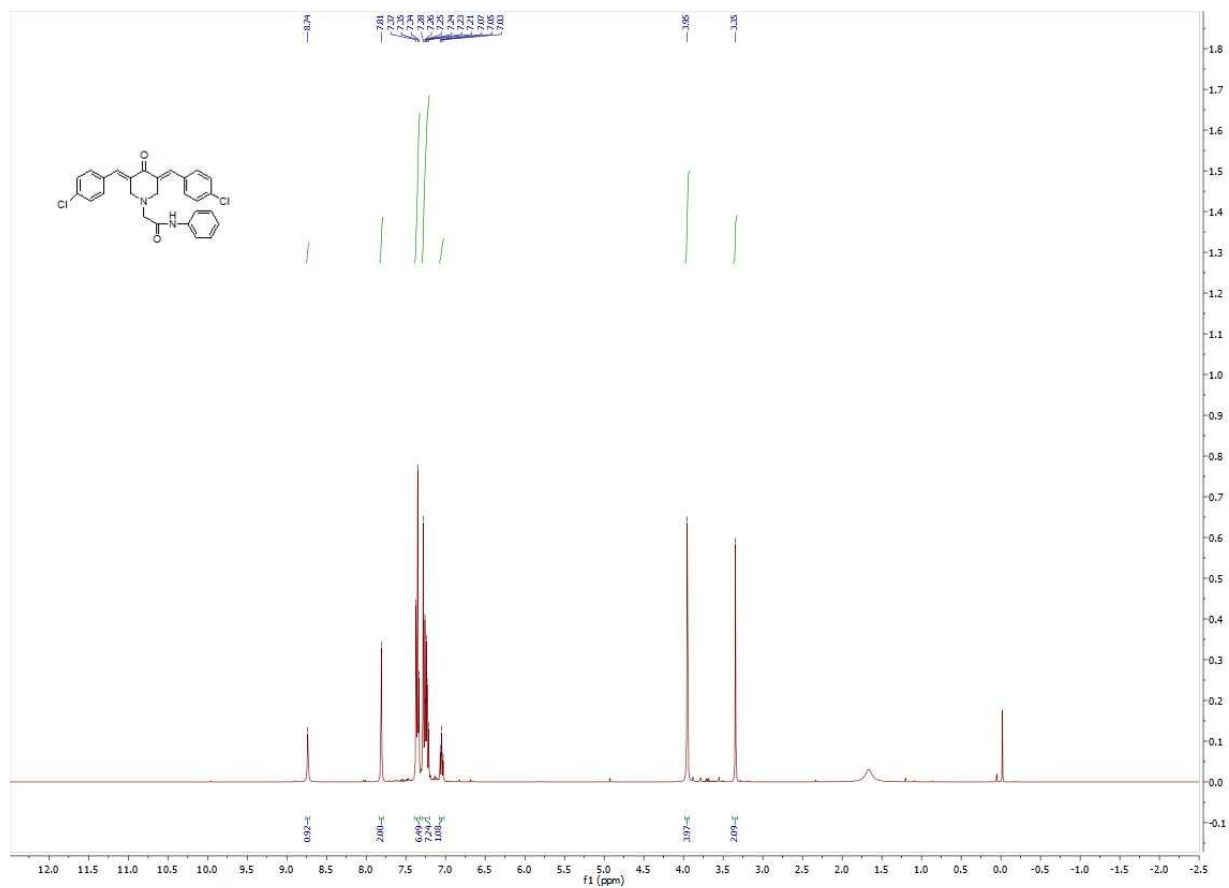

**Figure S14. <sup>1</sup>H-NMR of compound 4d.**

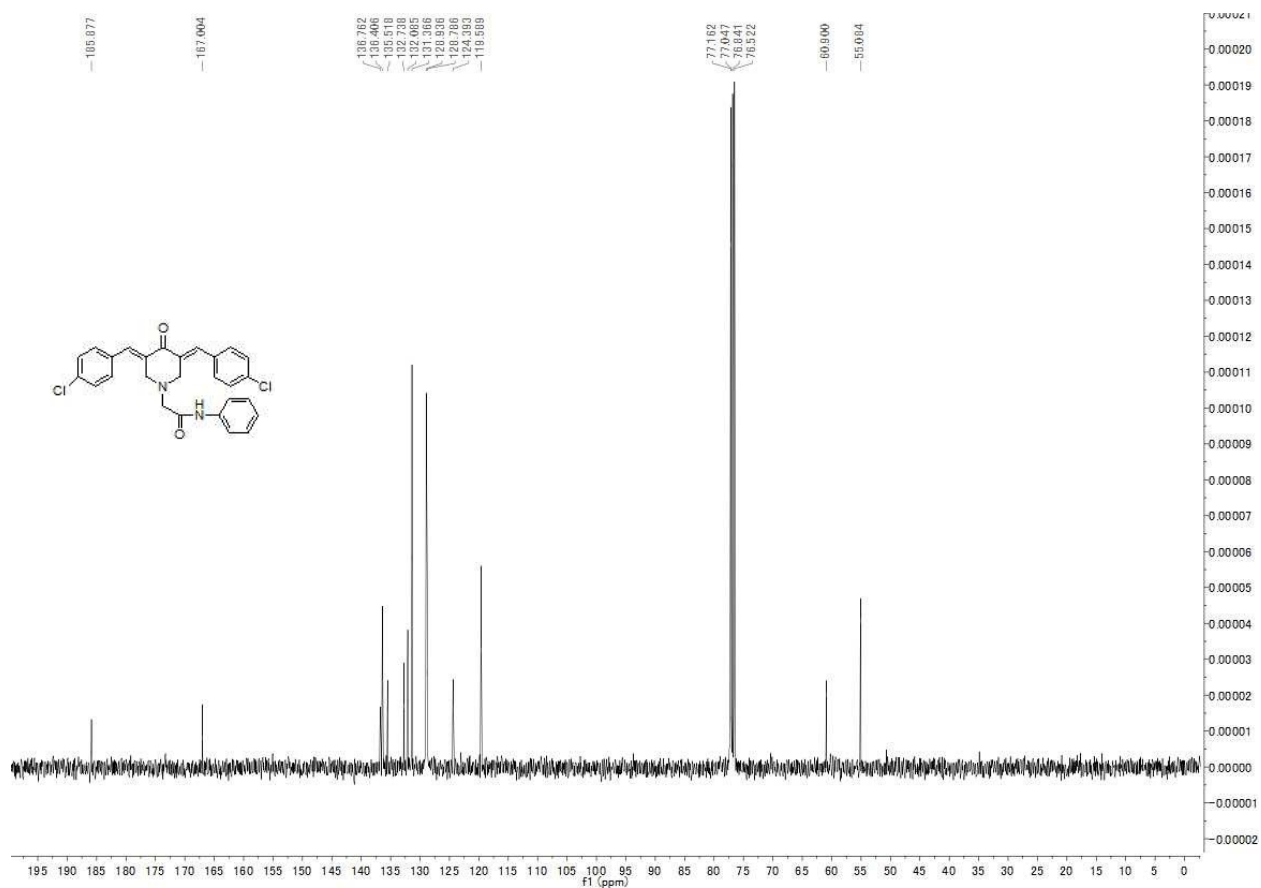

Figure S15. <sup>13</sup>C-NMR of compound 4d.

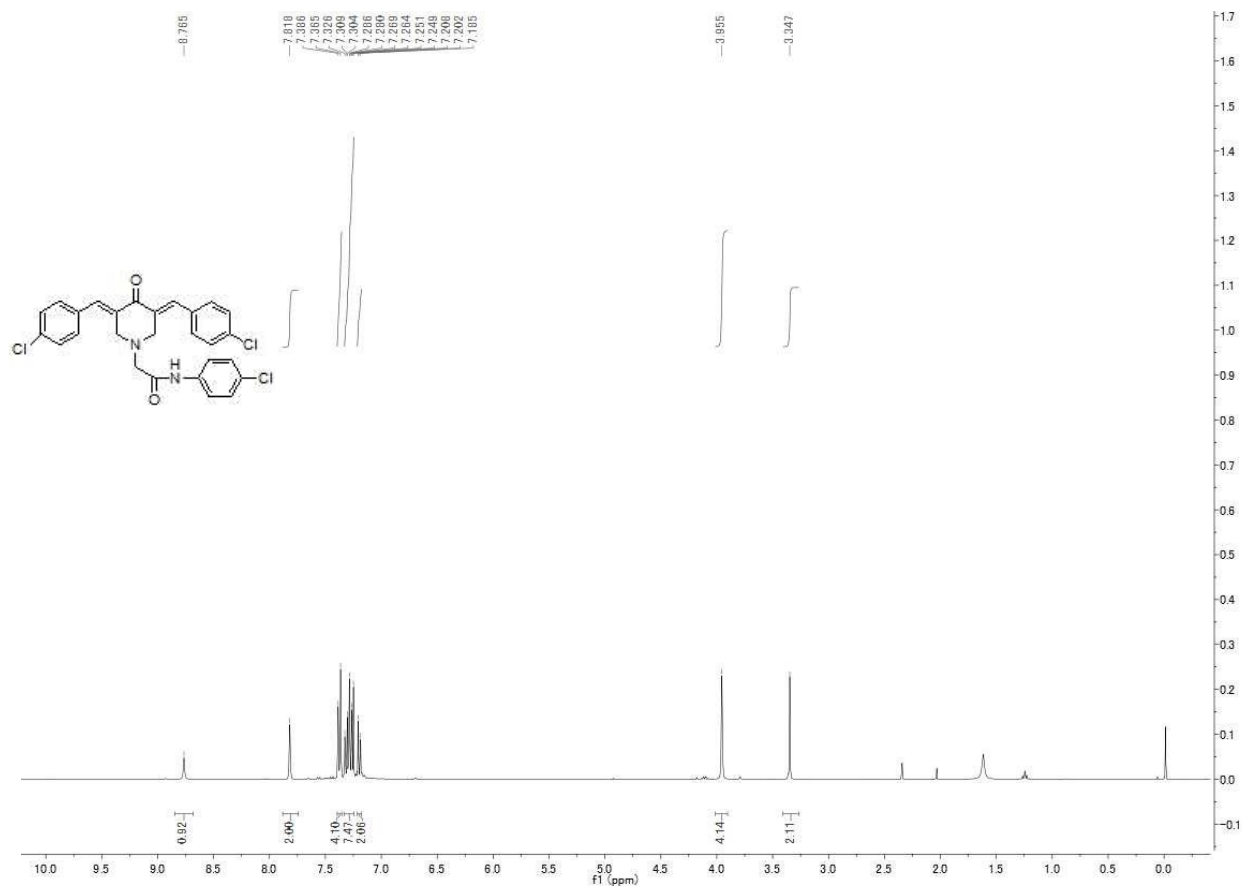

Figure S16. <sup>1</sup>H-NMR of compound 4e.

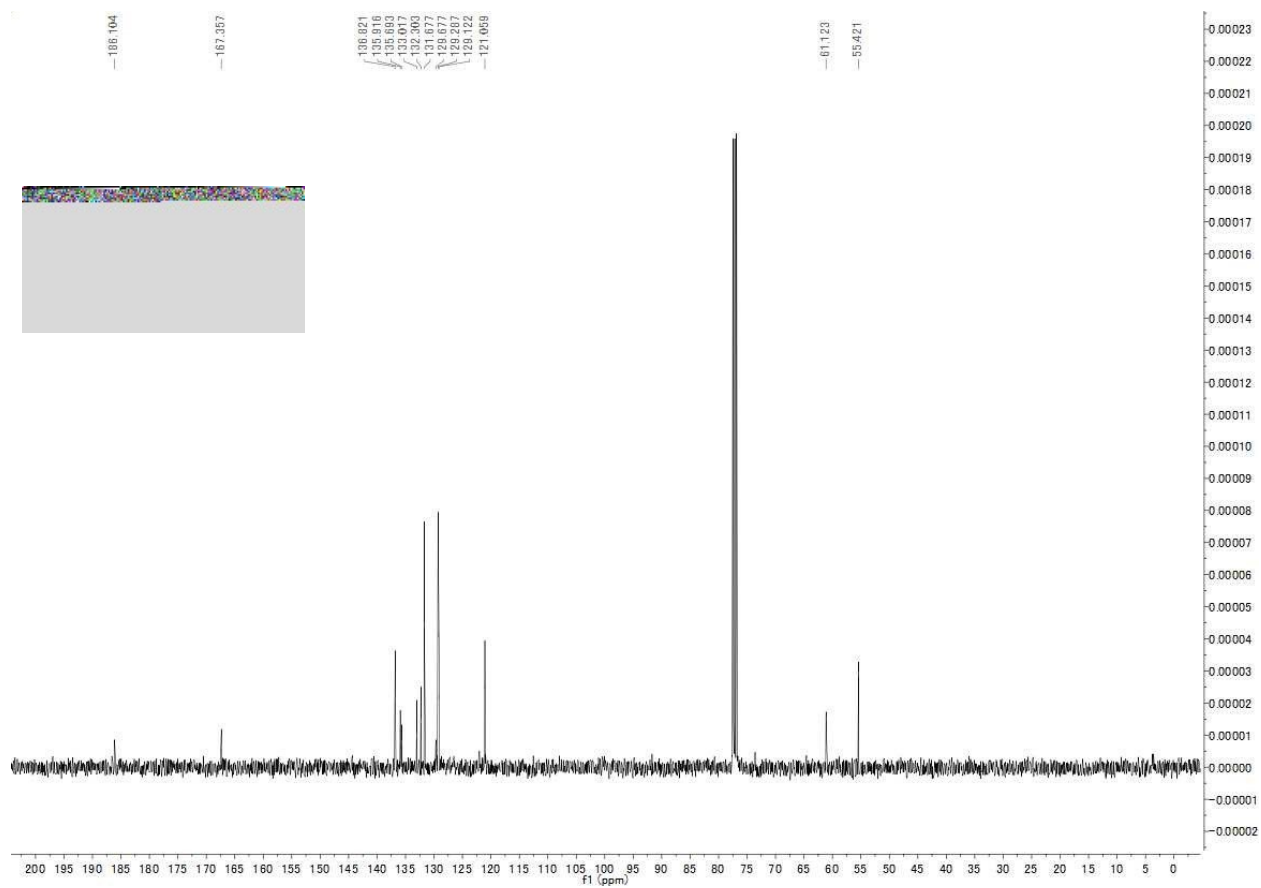

**Figure S17. <sup>13</sup>C-NMR of compound 4e.**

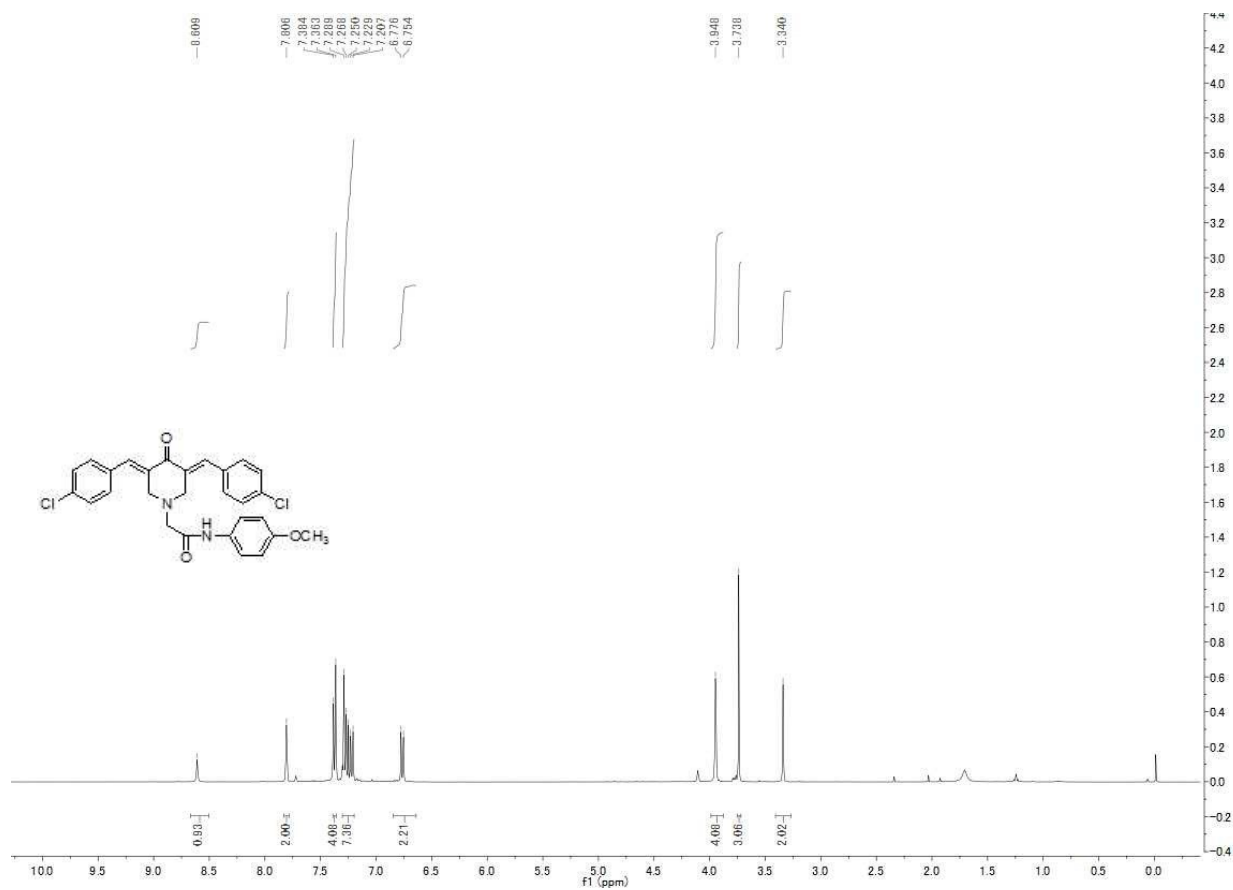

**Figure S18. <sup>1</sup>H-NMR of compound 4f.**



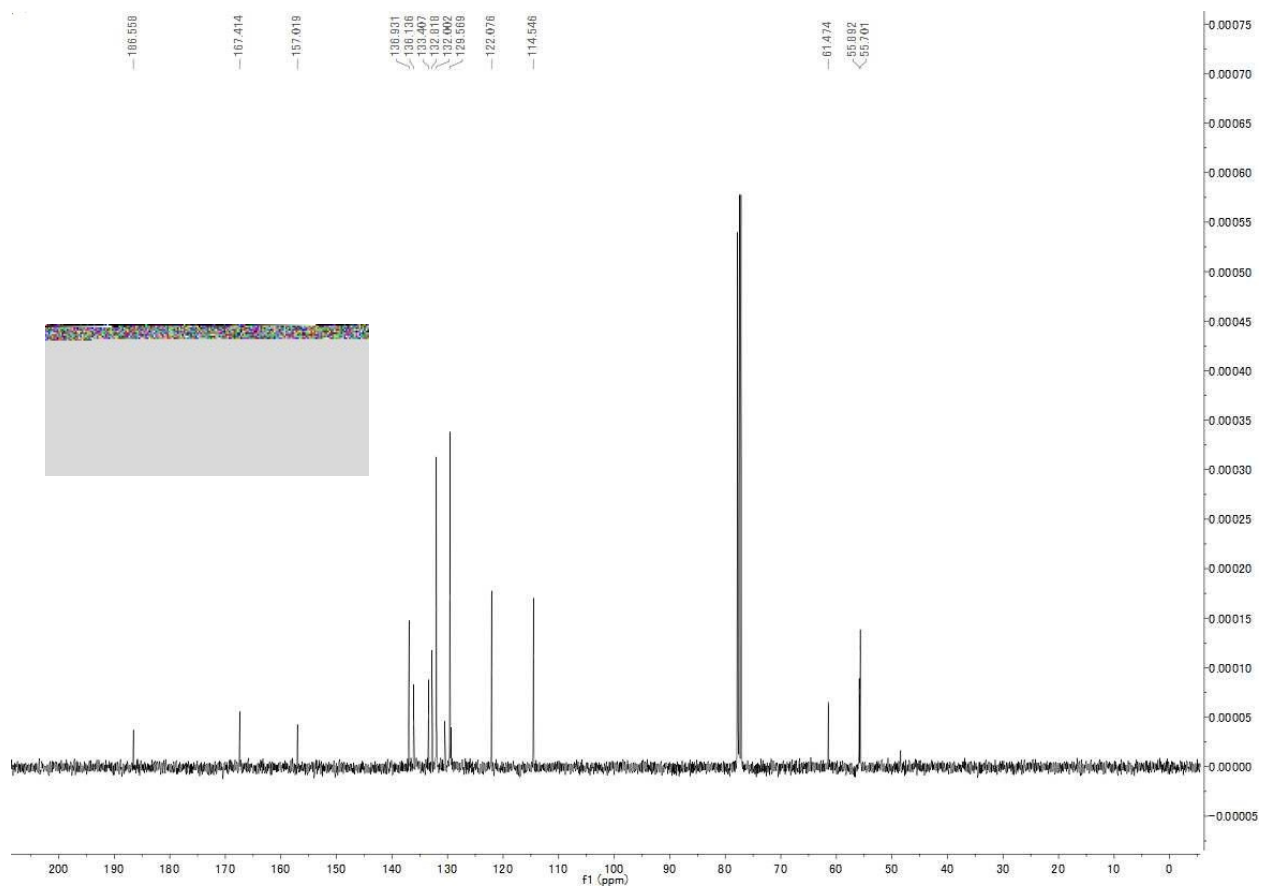

**Figure S19. <sup>13</sup>C-NMR of compound 4f.**

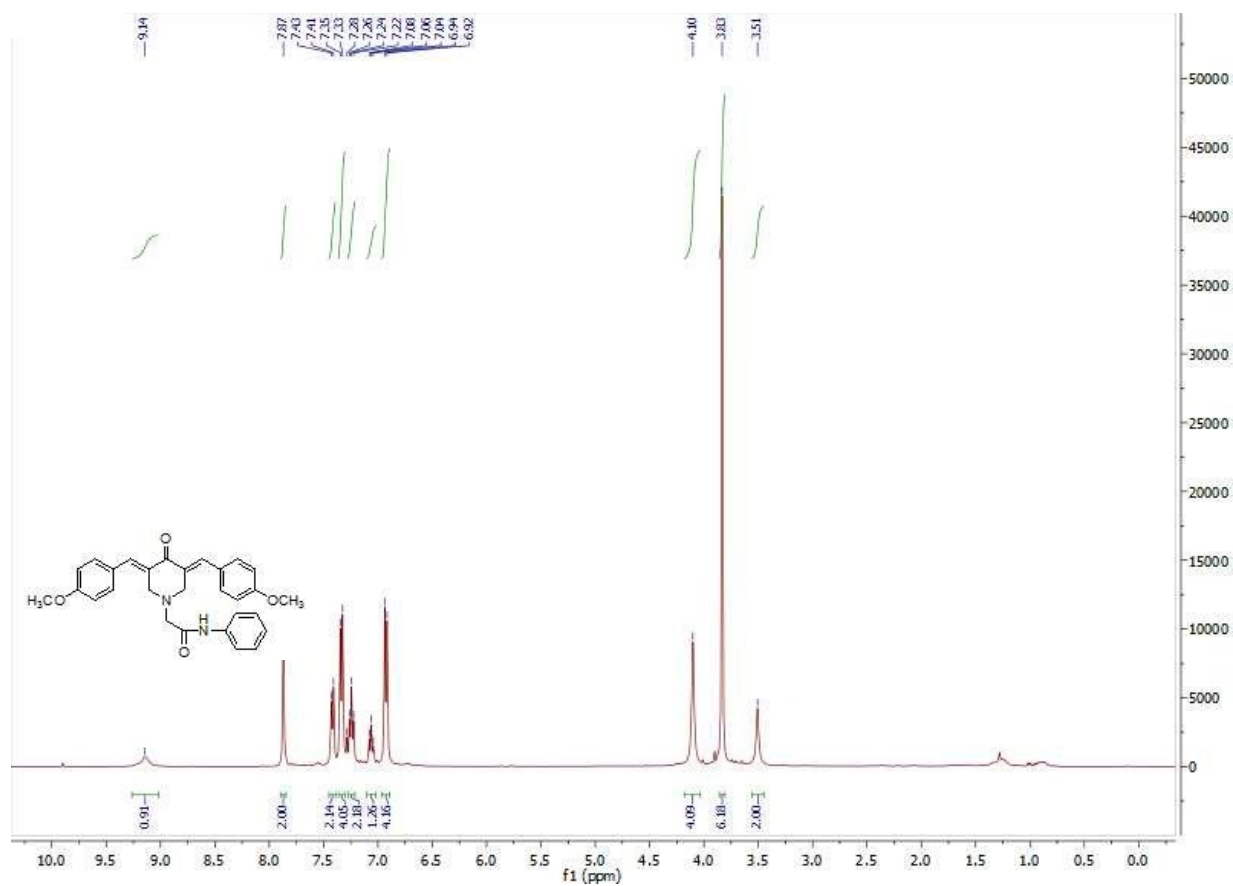

**Figure S20. <sup>1</sup>H-NMR of compound 4g.**

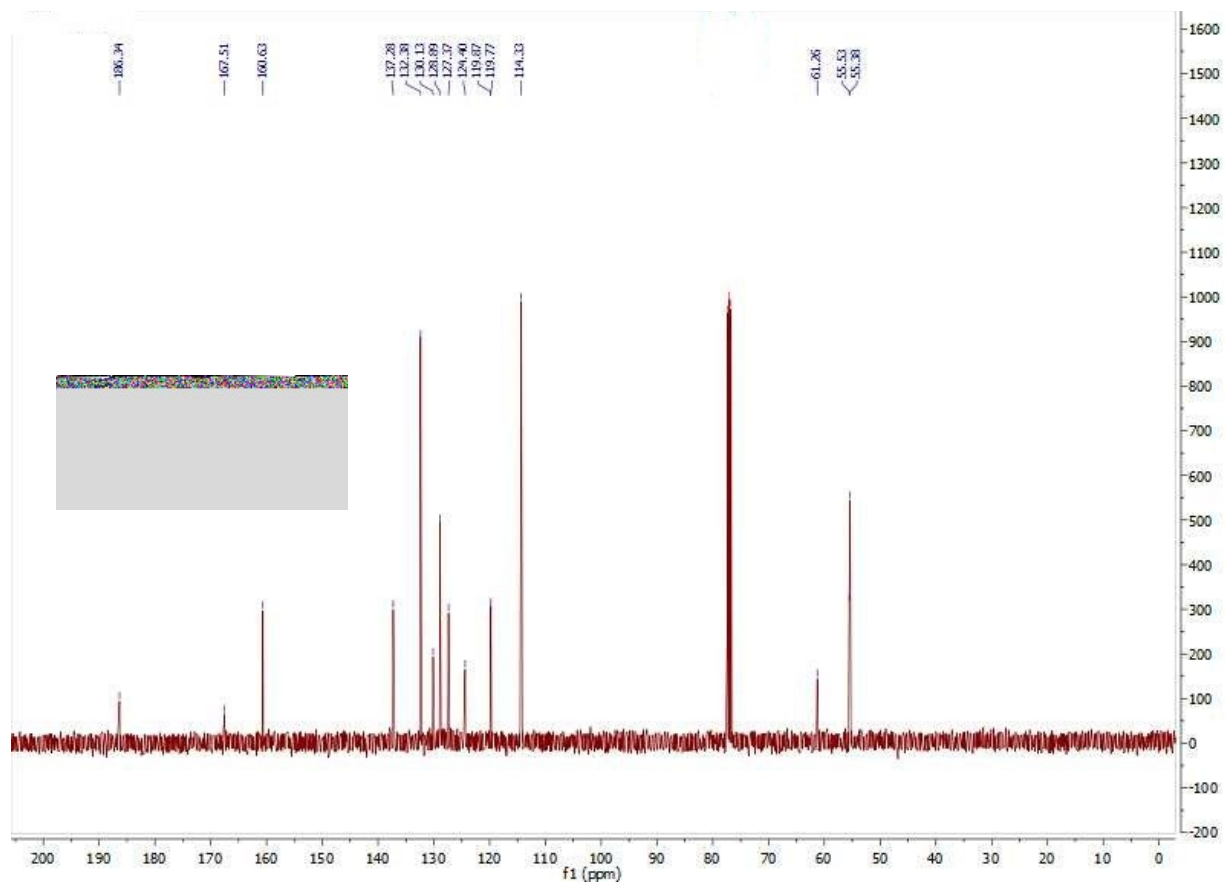

**Figure S21.** <sup>13</sup>C-NMR of compound 4g.

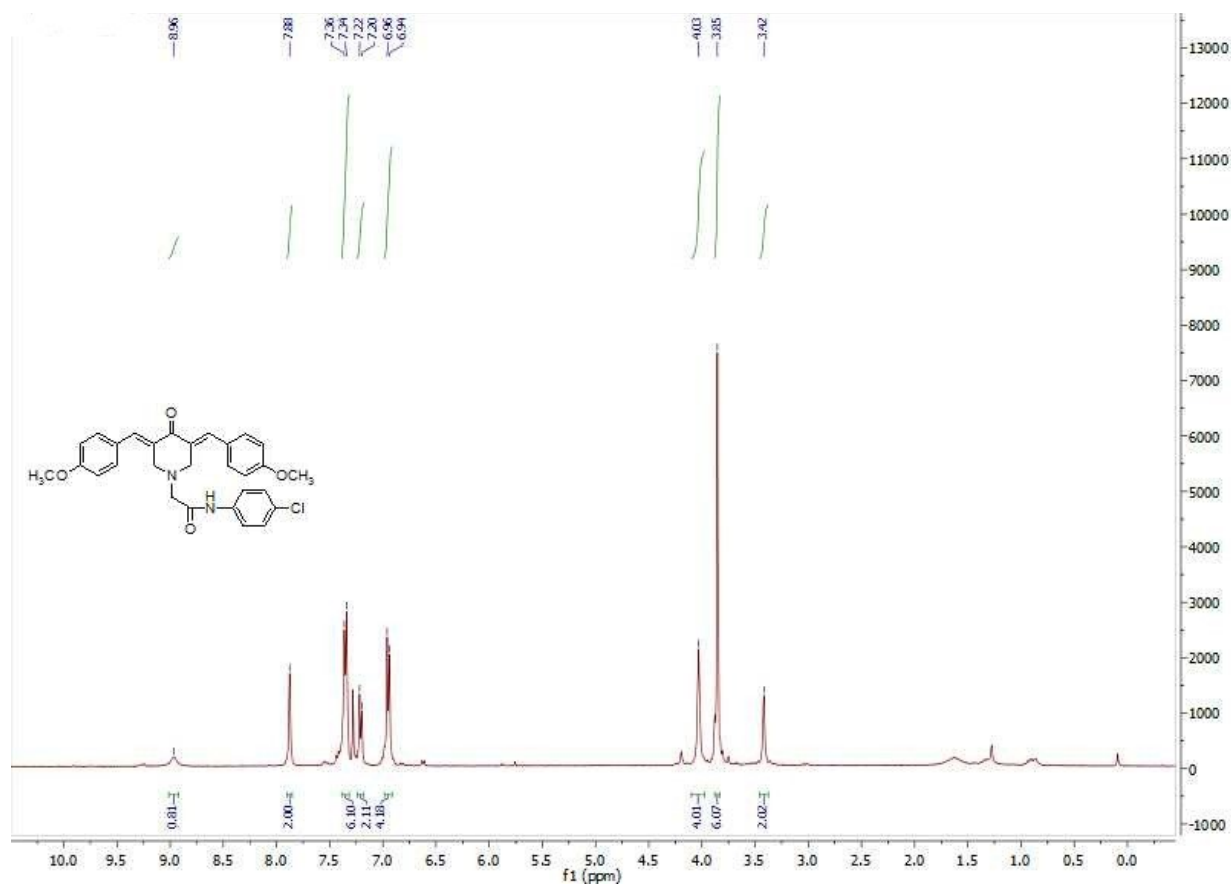

Figure S22. <sup>1</sup>H-NMR of compound 4h.

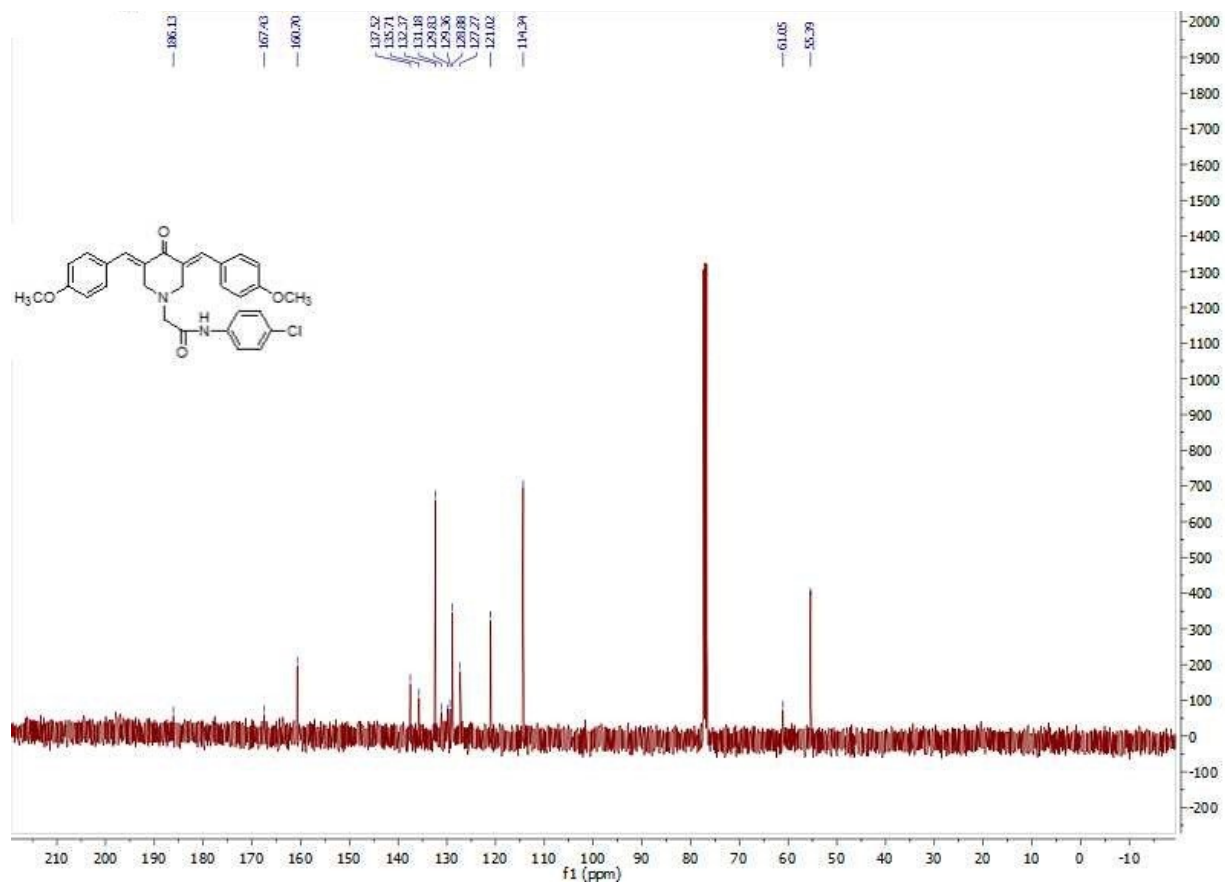

Figure S23. <sup>13</sup>C-NMR of compound 4h.

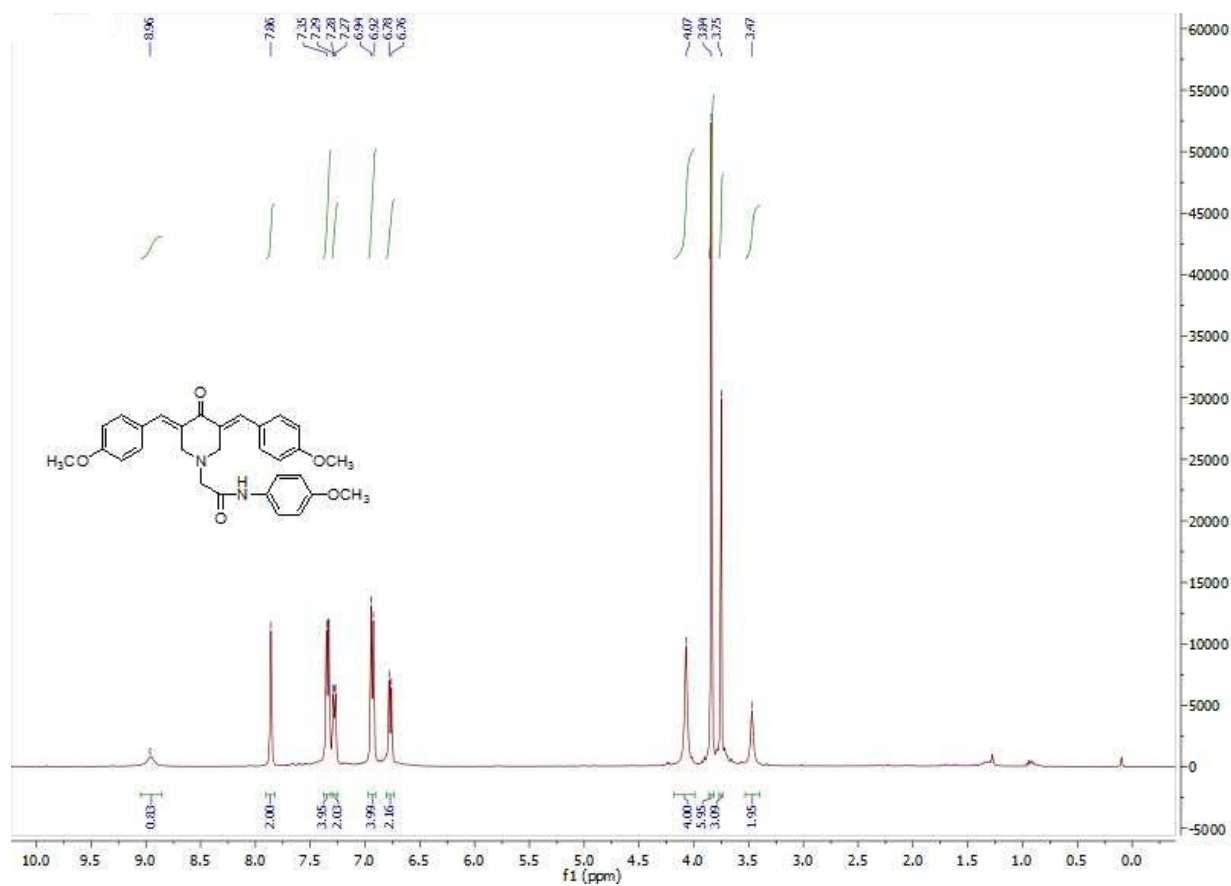

Figure S24.  $^1\text{H}$ -NMR of compound 4i.

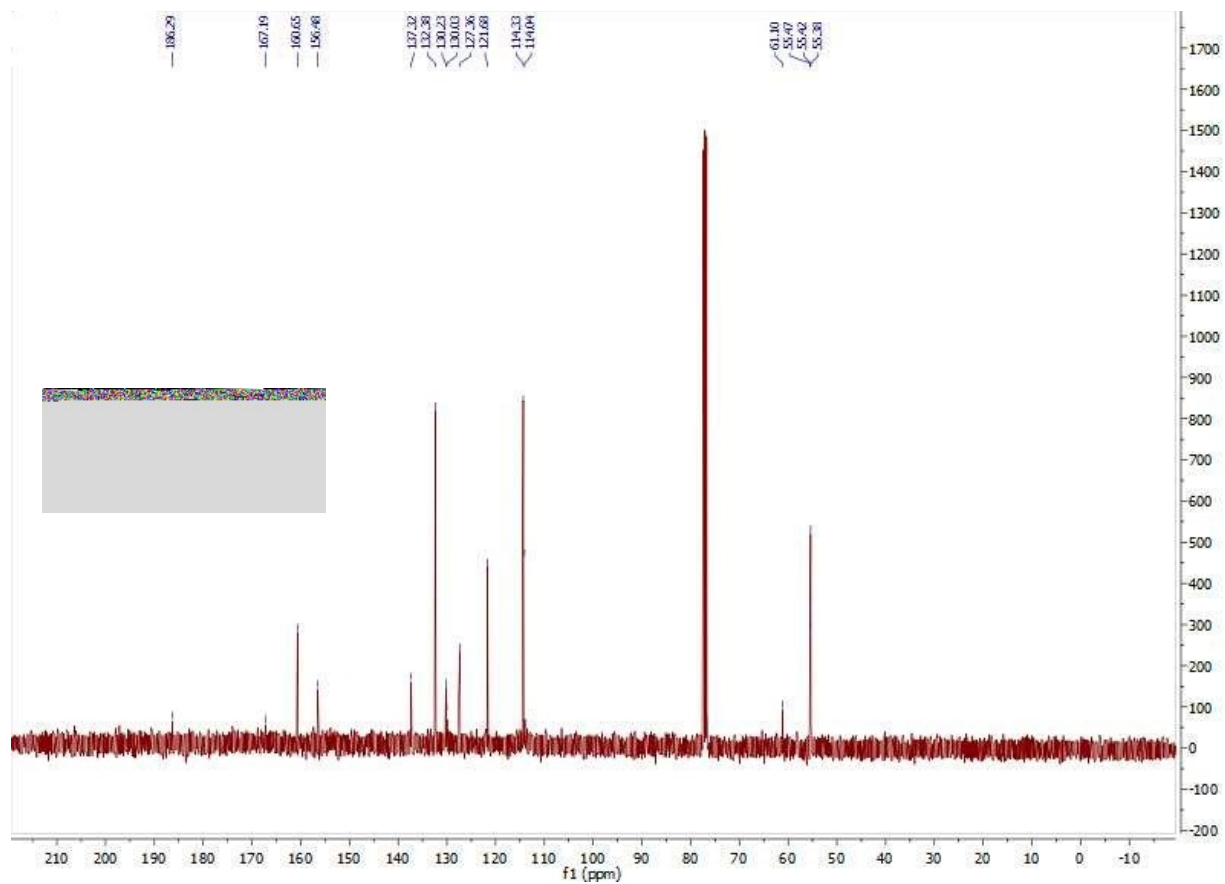

**Figure S25.** <sup>13</sup>C-NMR of compound 4i.

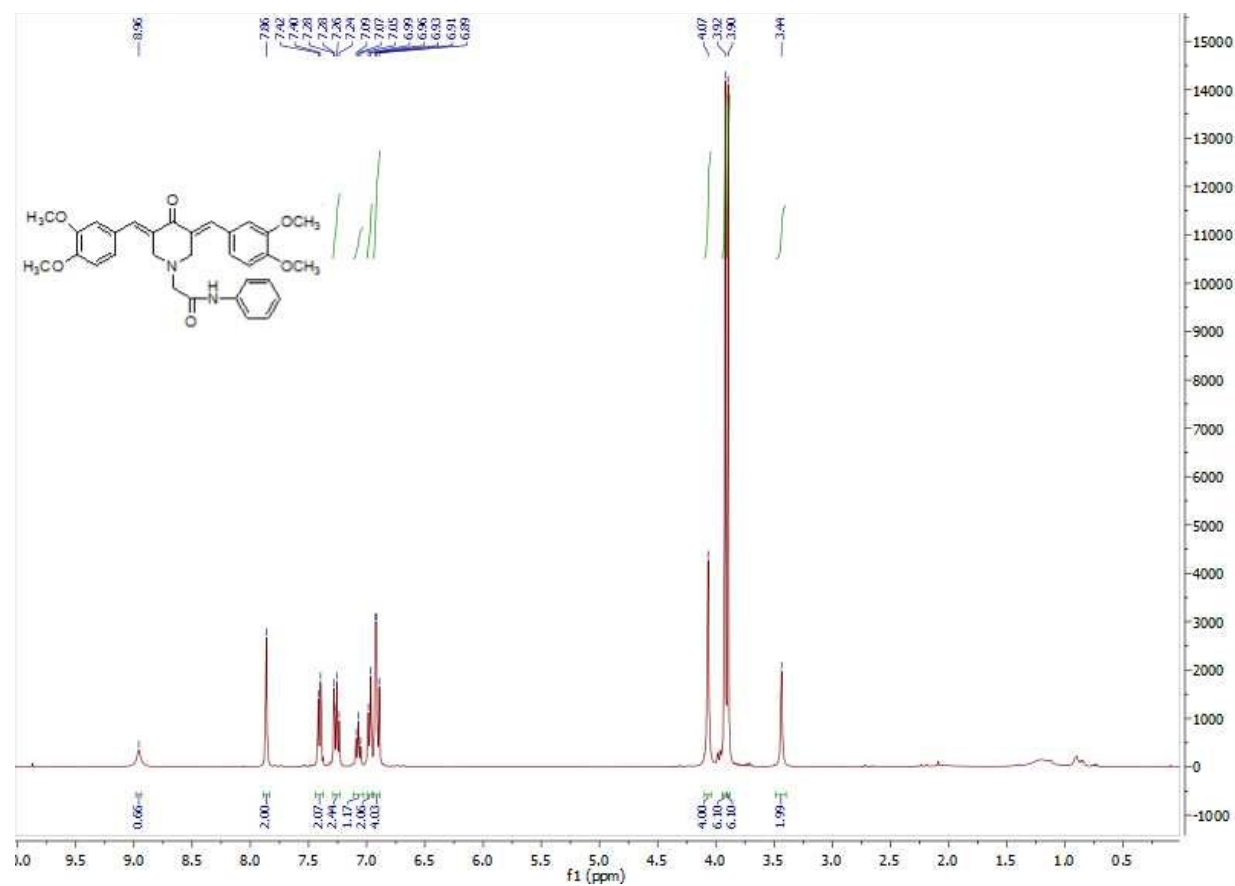

FigureS26. <sup>1</sup>H-NMR of compound 4j.



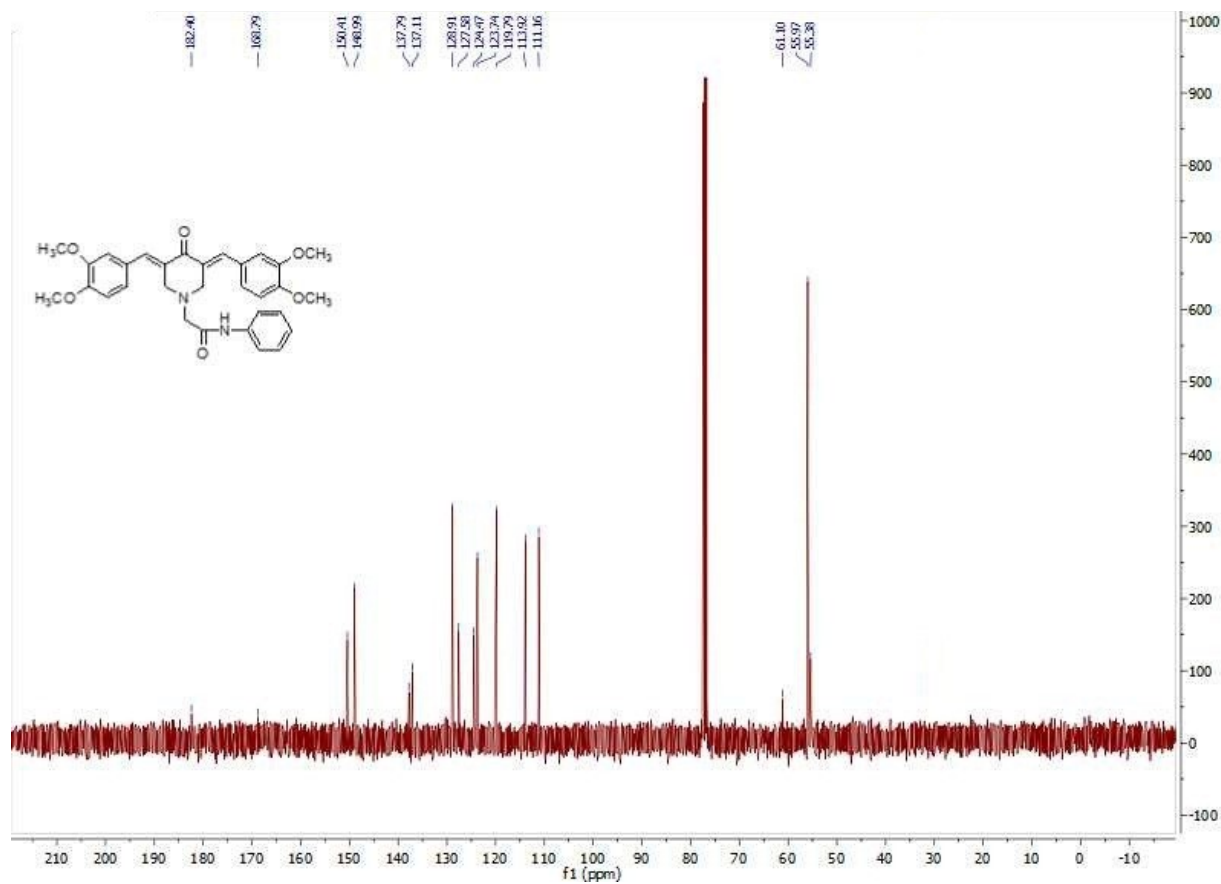

FigureS27. <sup>13</sup>C-NMR of compound 4j.

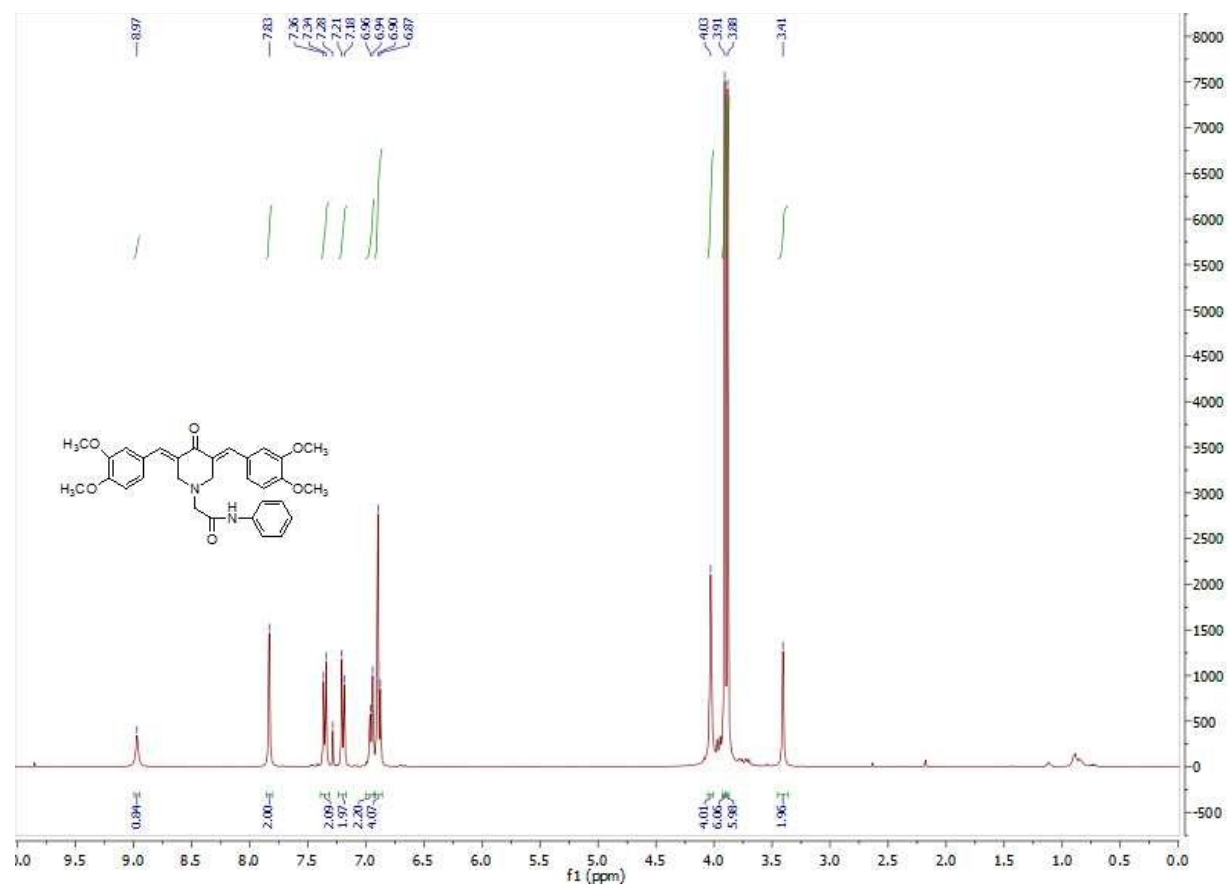

Figure S28. <sup>1</sup>H-NMR of compound 4k.

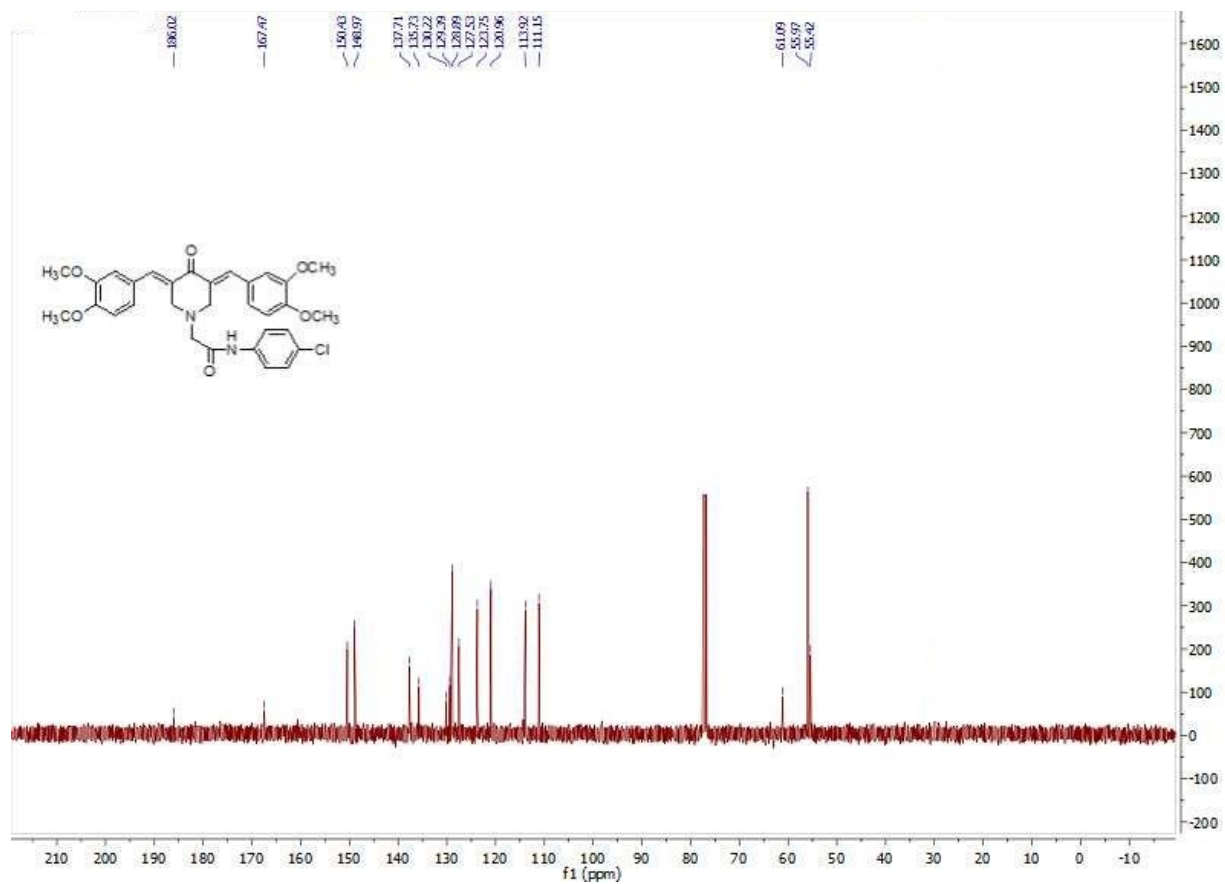

Figure S29. <sup>13</sup>C-NMR of compound 4k.

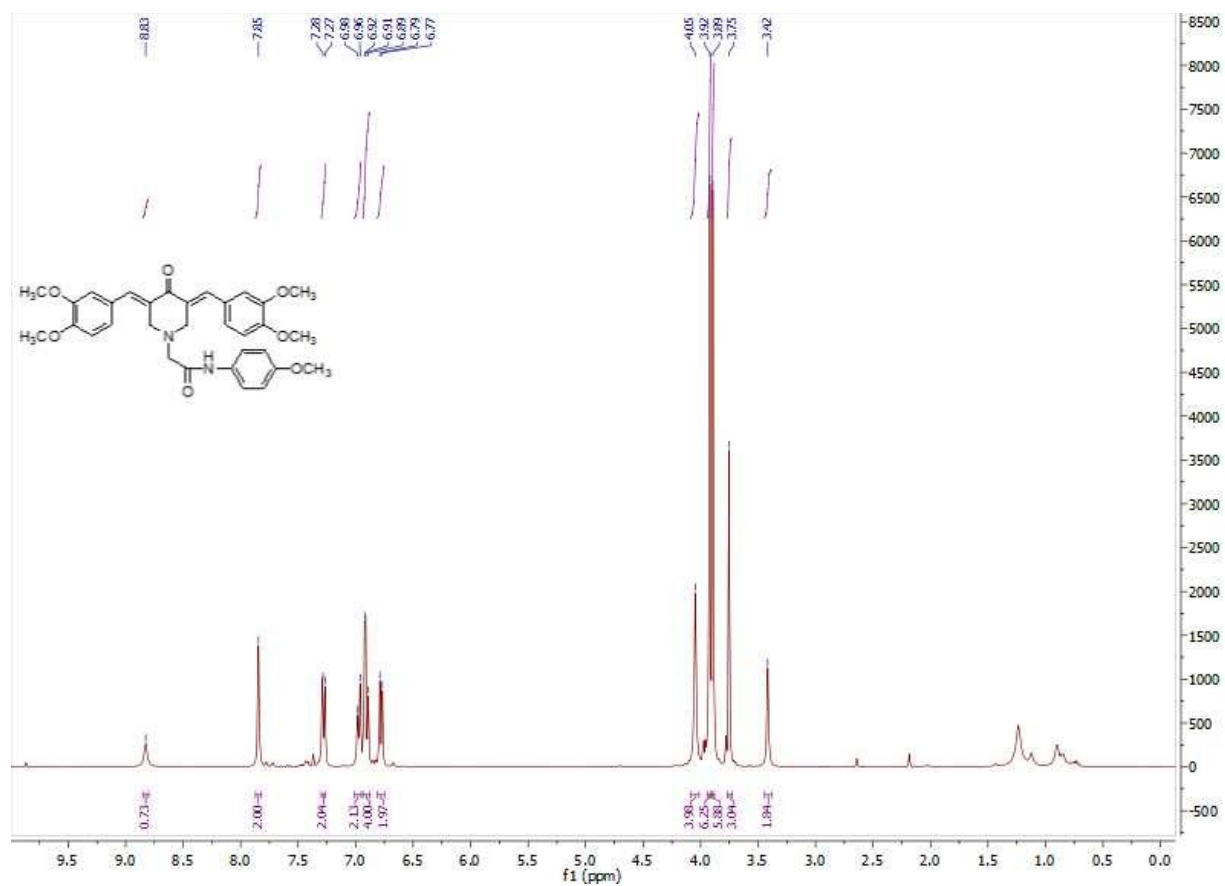

Figure S30. <sup>1</sup>H-NMR of compound 4l.

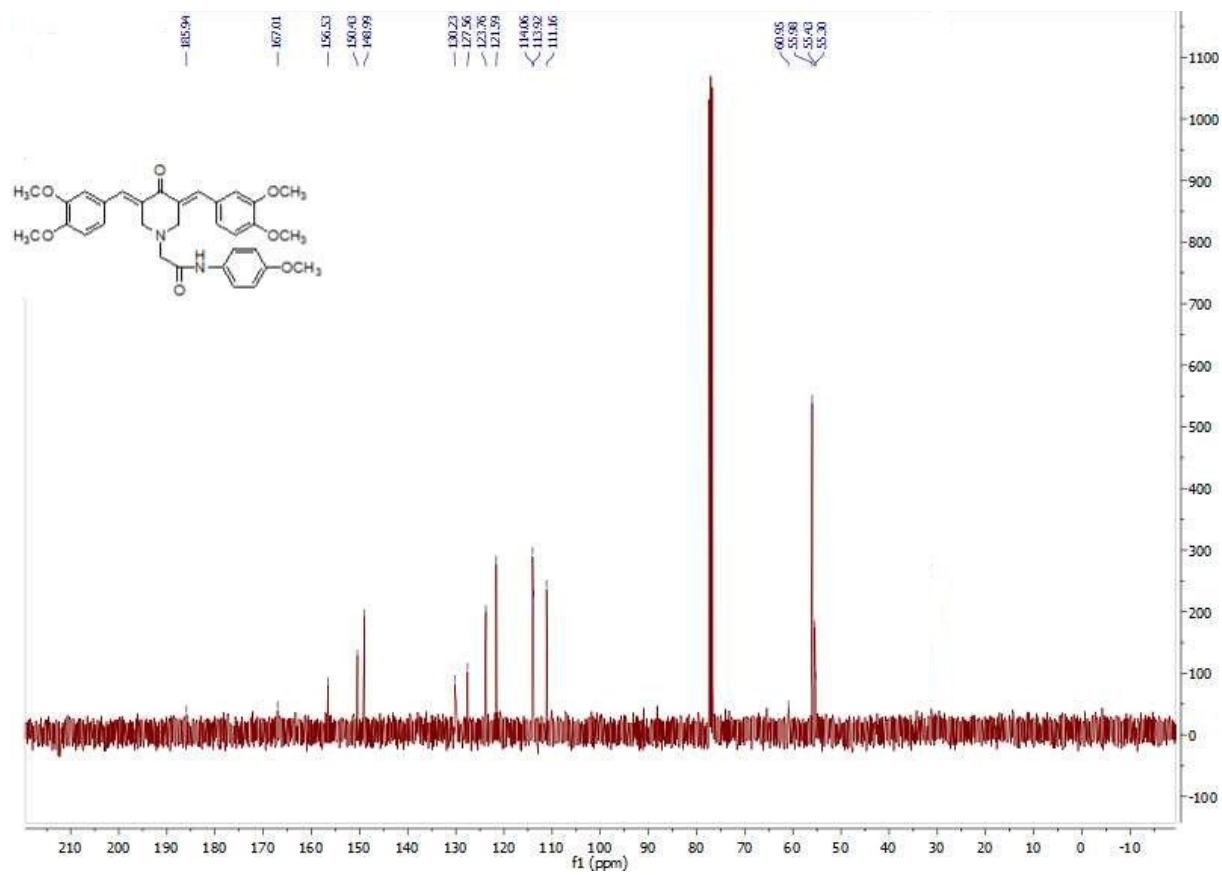

Figure S31. <sup>13</sup>C-NMR of compound 4l.

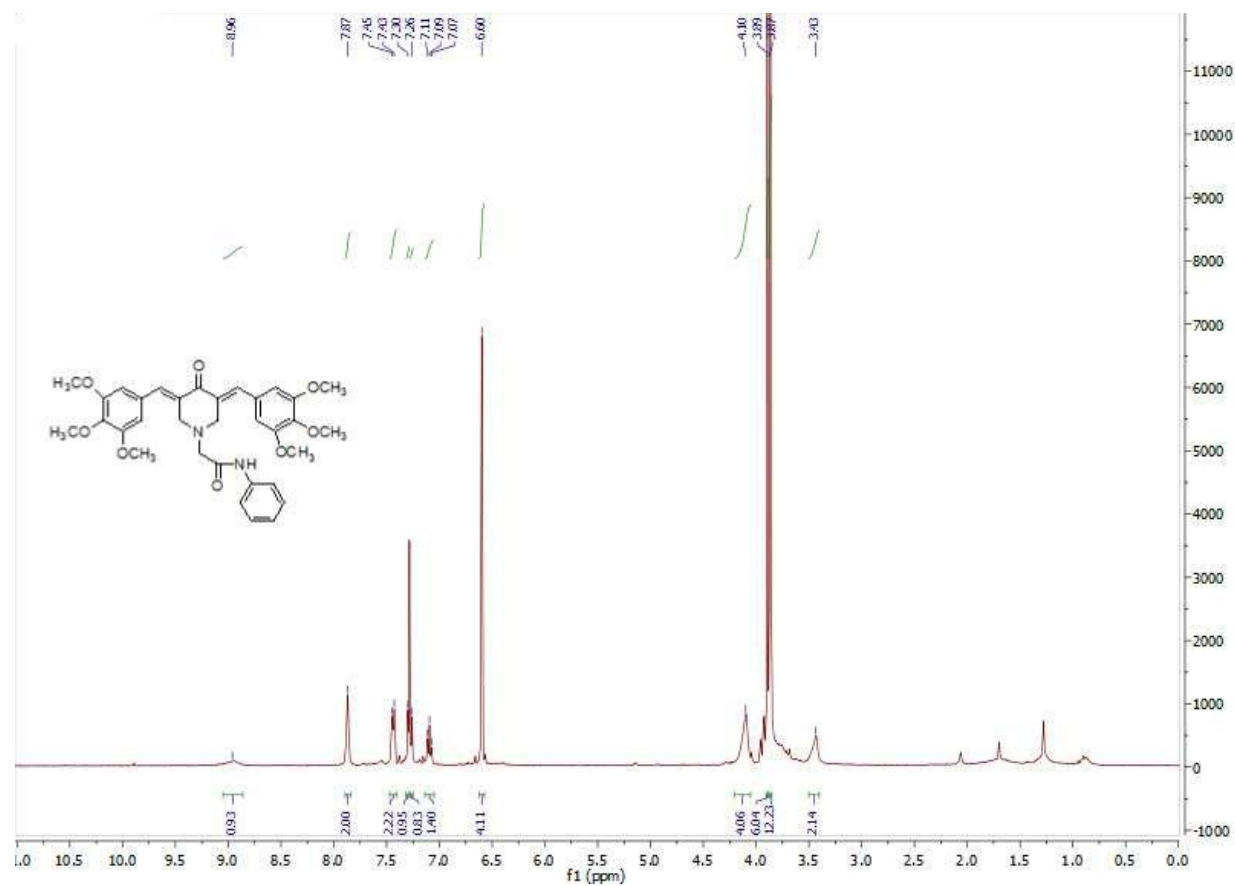

Figure S32. <sup>1</sup>H-NMR of compound 4m.

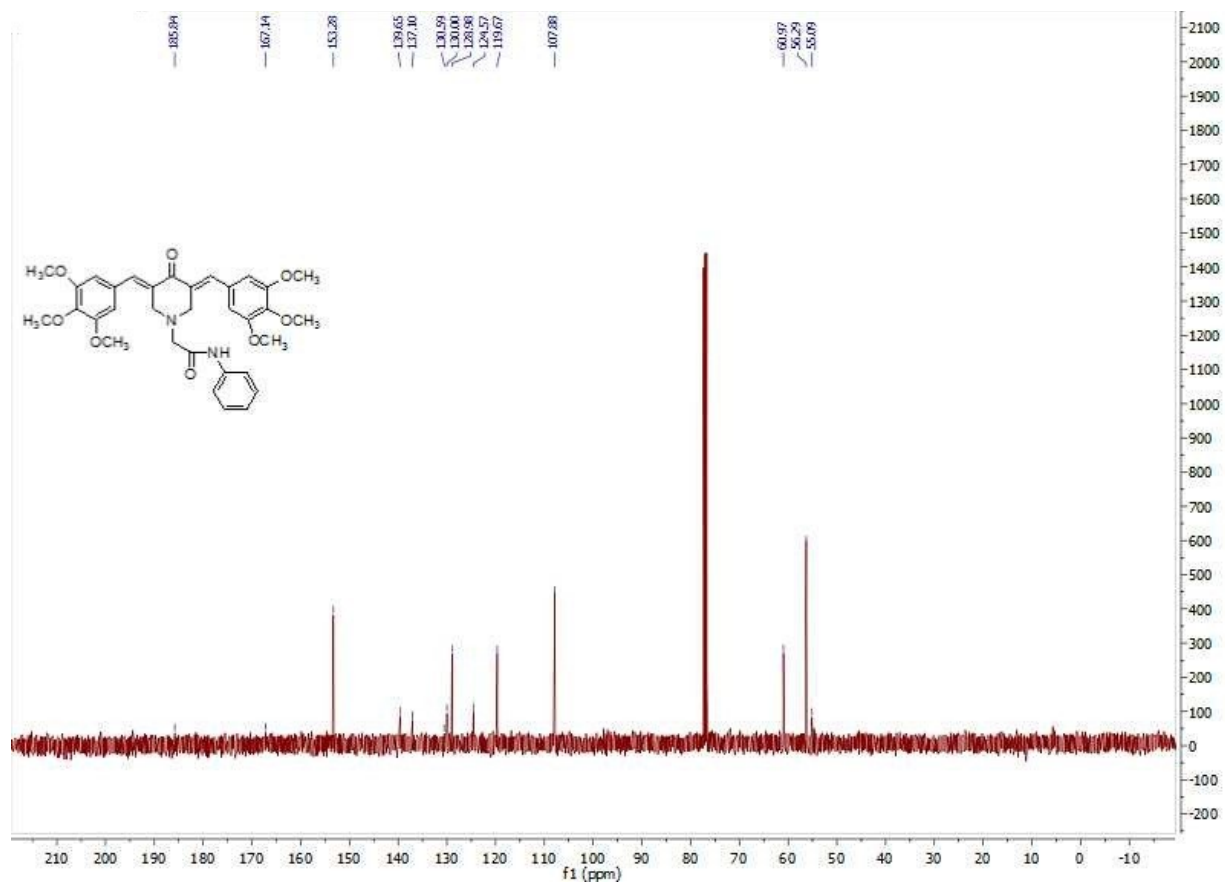

Figure S33.  $^{13}\text{C}$ -NMR of compound 4m.

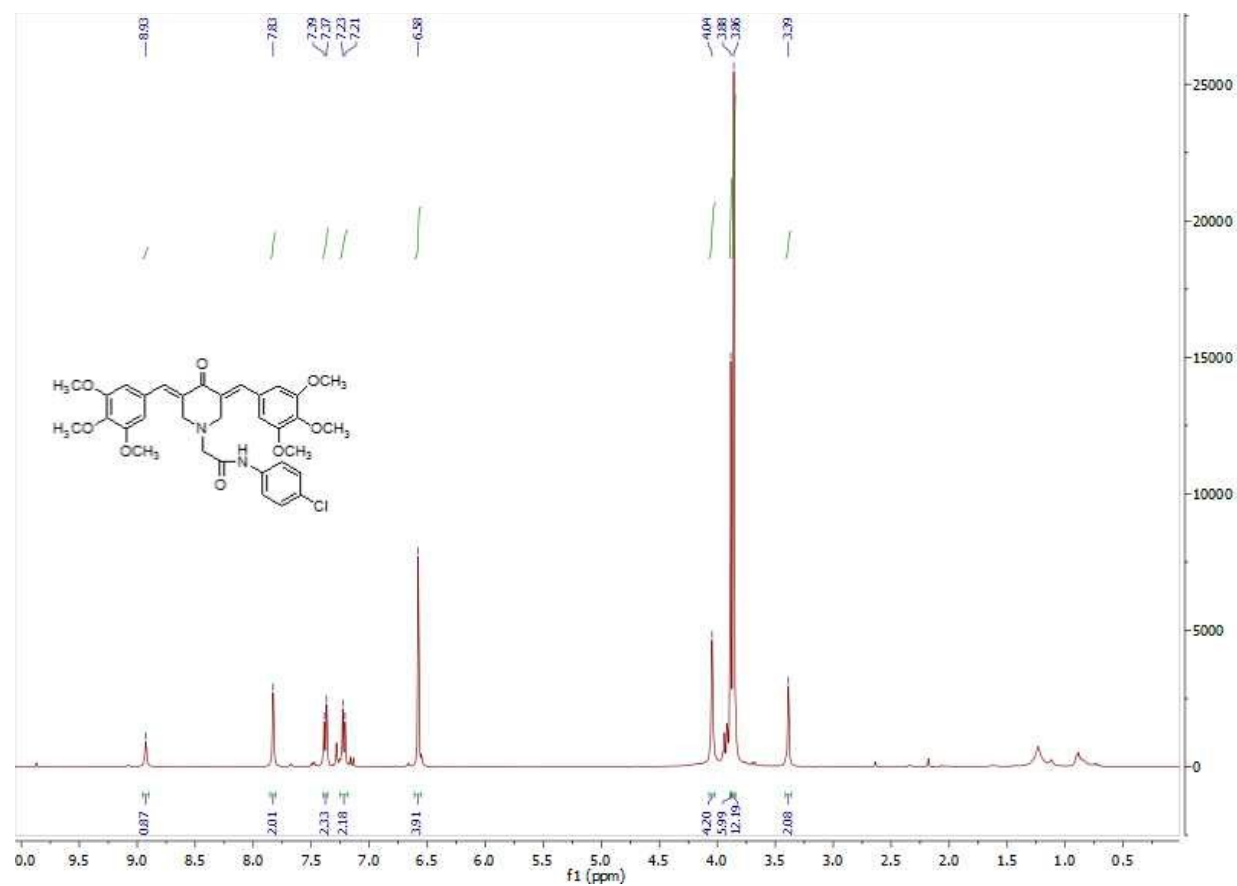

Figure S34. <sup>1</sup>H-NMR of compound 4n.



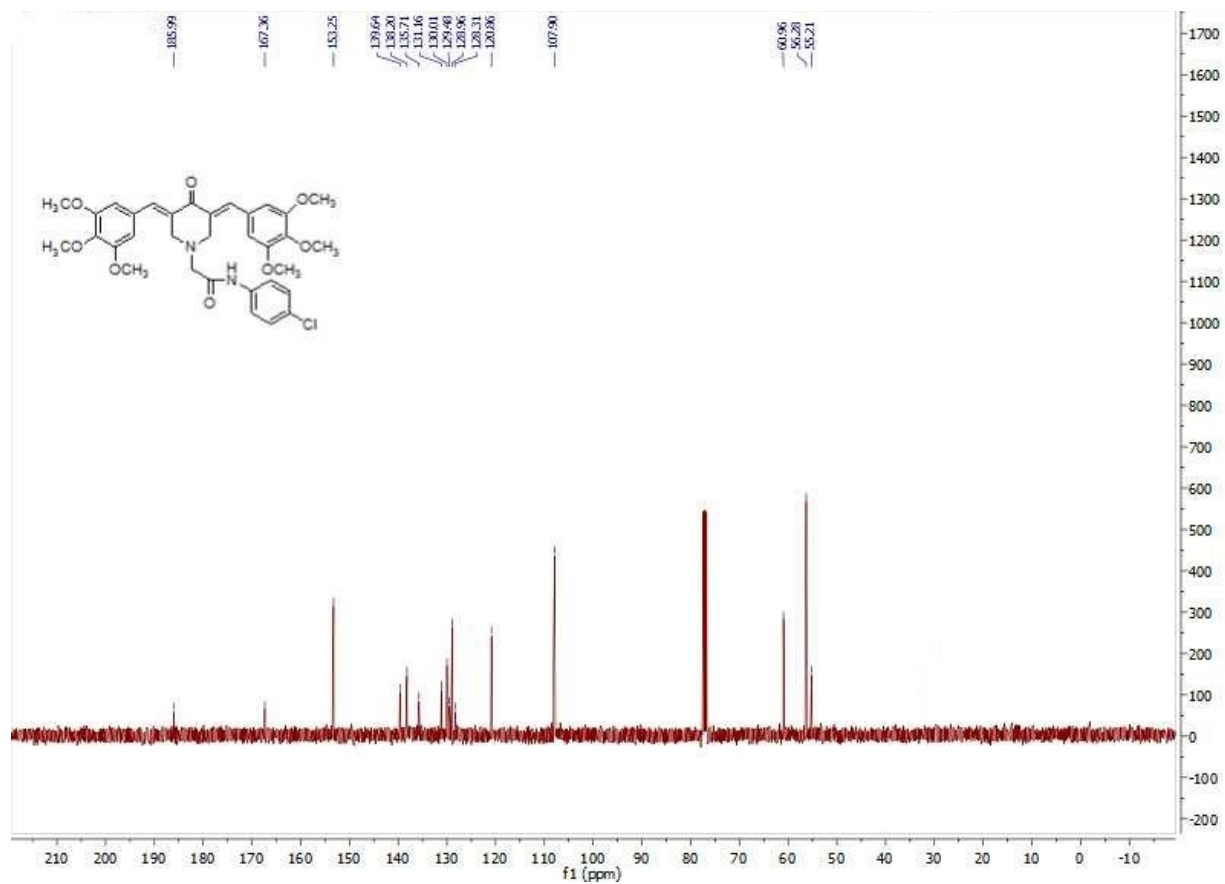

Figure S35. <sup>13</sup>C-NMR of compound 4n.

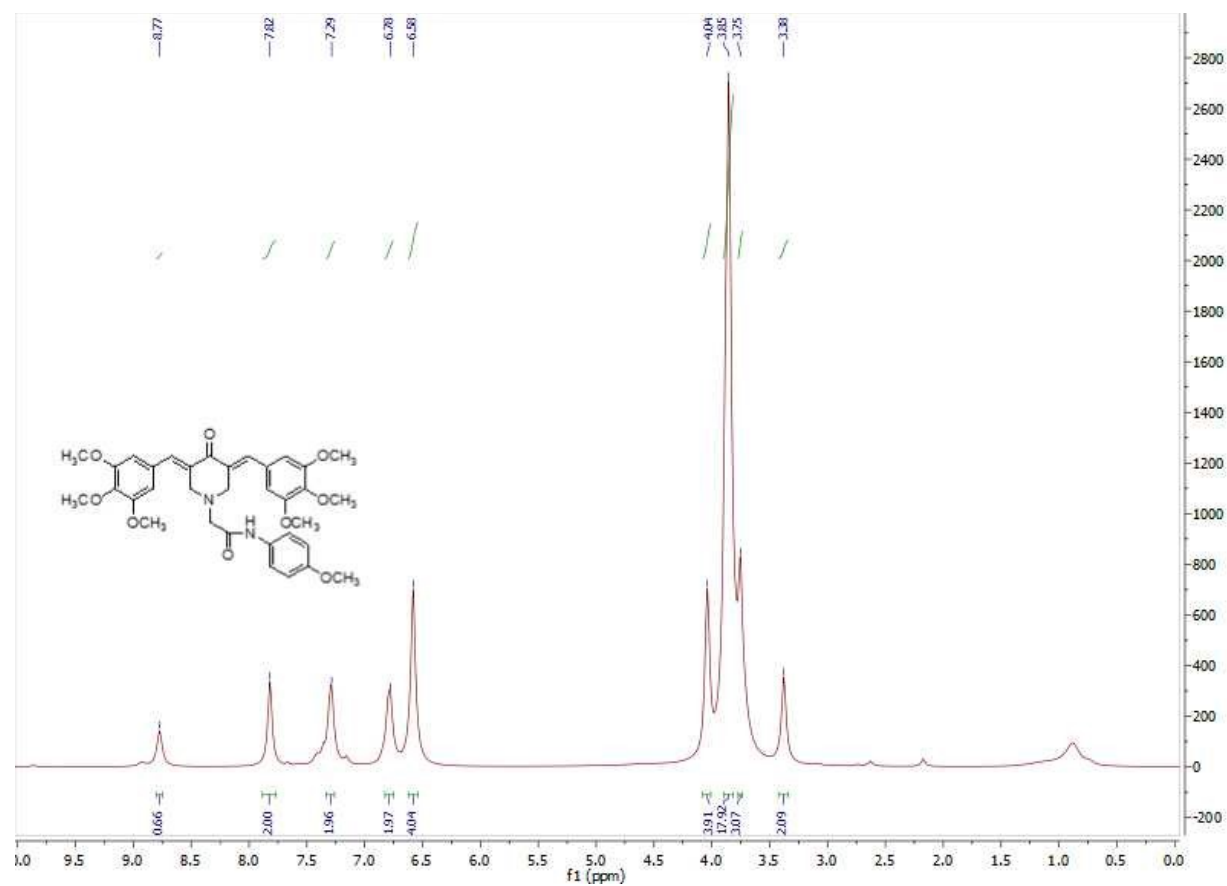

Figure S36.  $^1\text{H}$ -NMR of compound 4o.

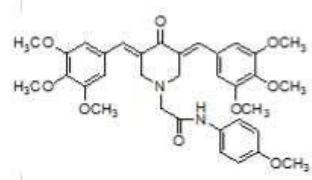

43

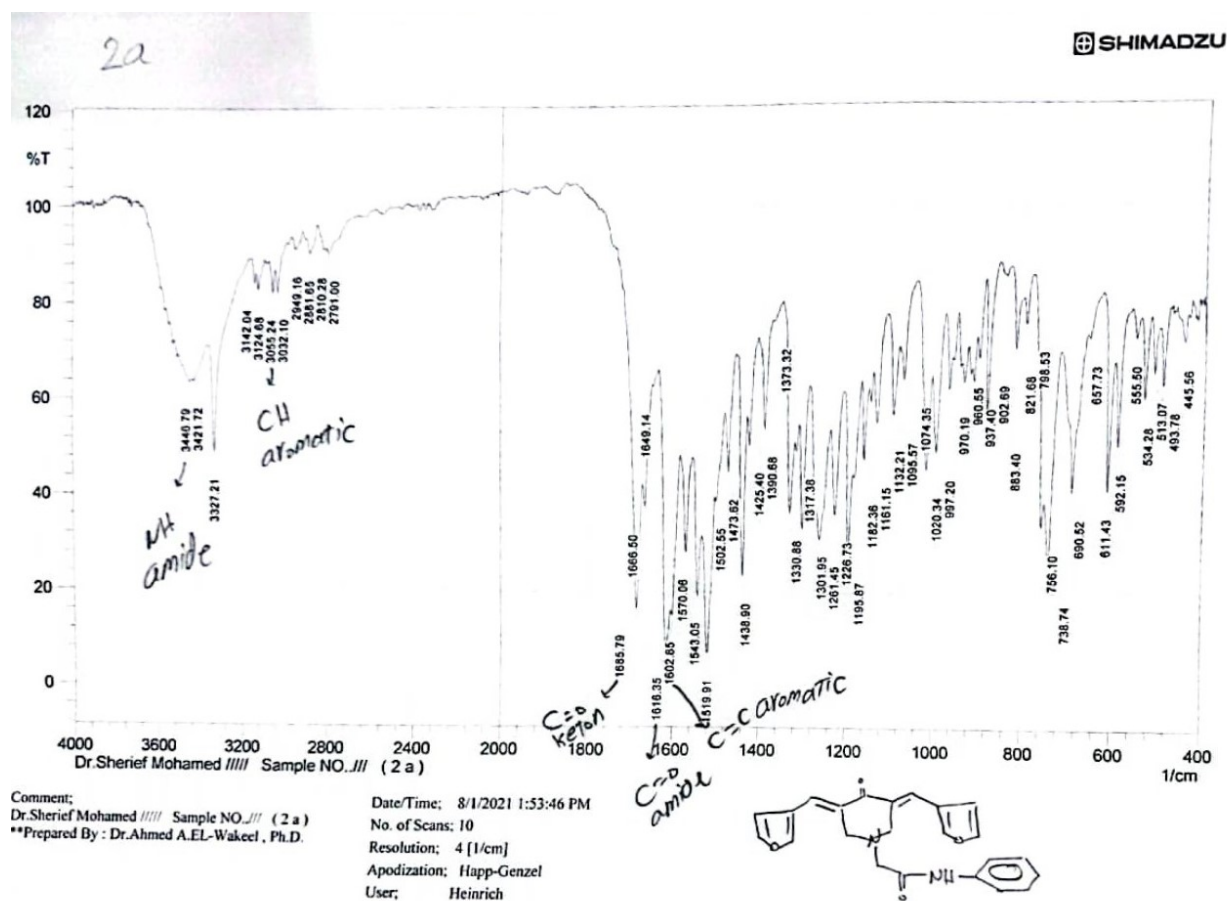

Figure S38. IR spectrum of compound 2a

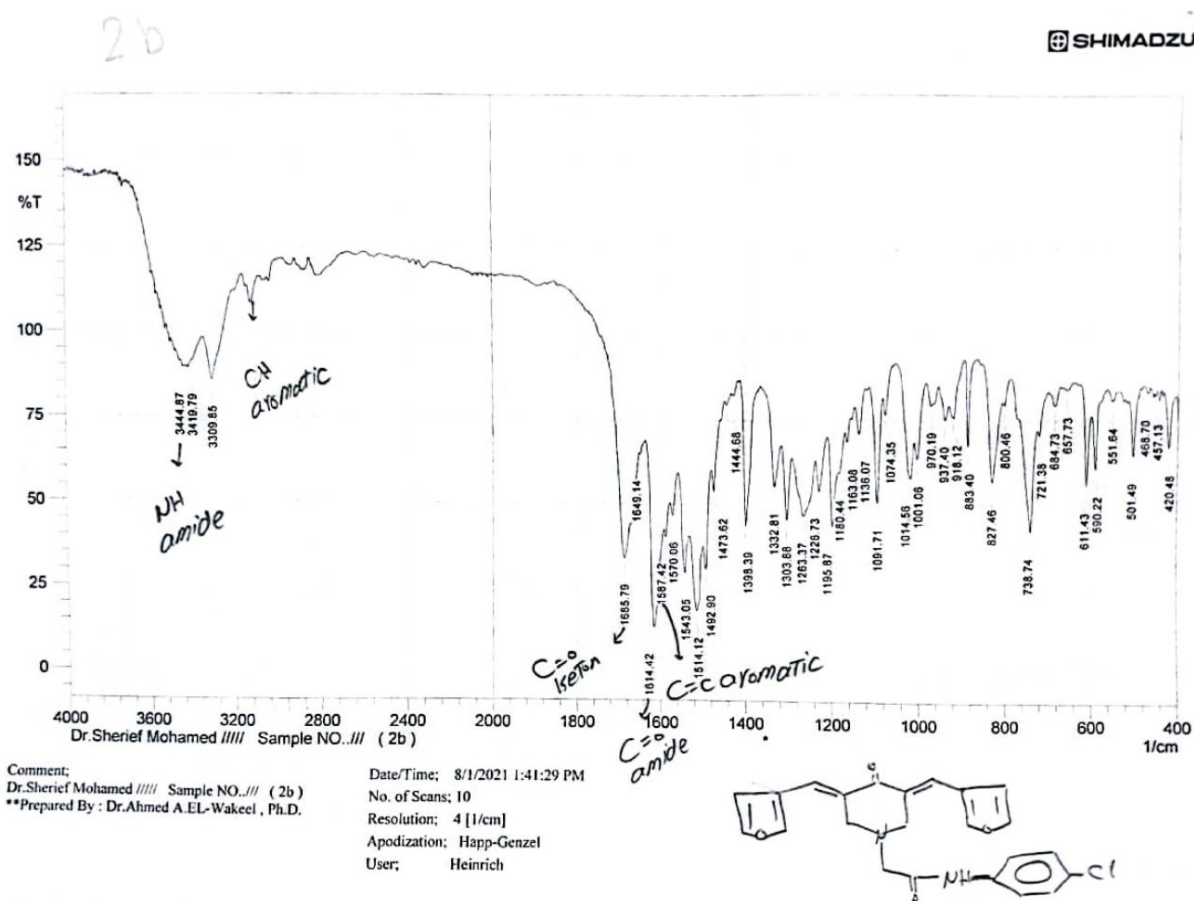

Figure S39. IR spectrum of compound 2b

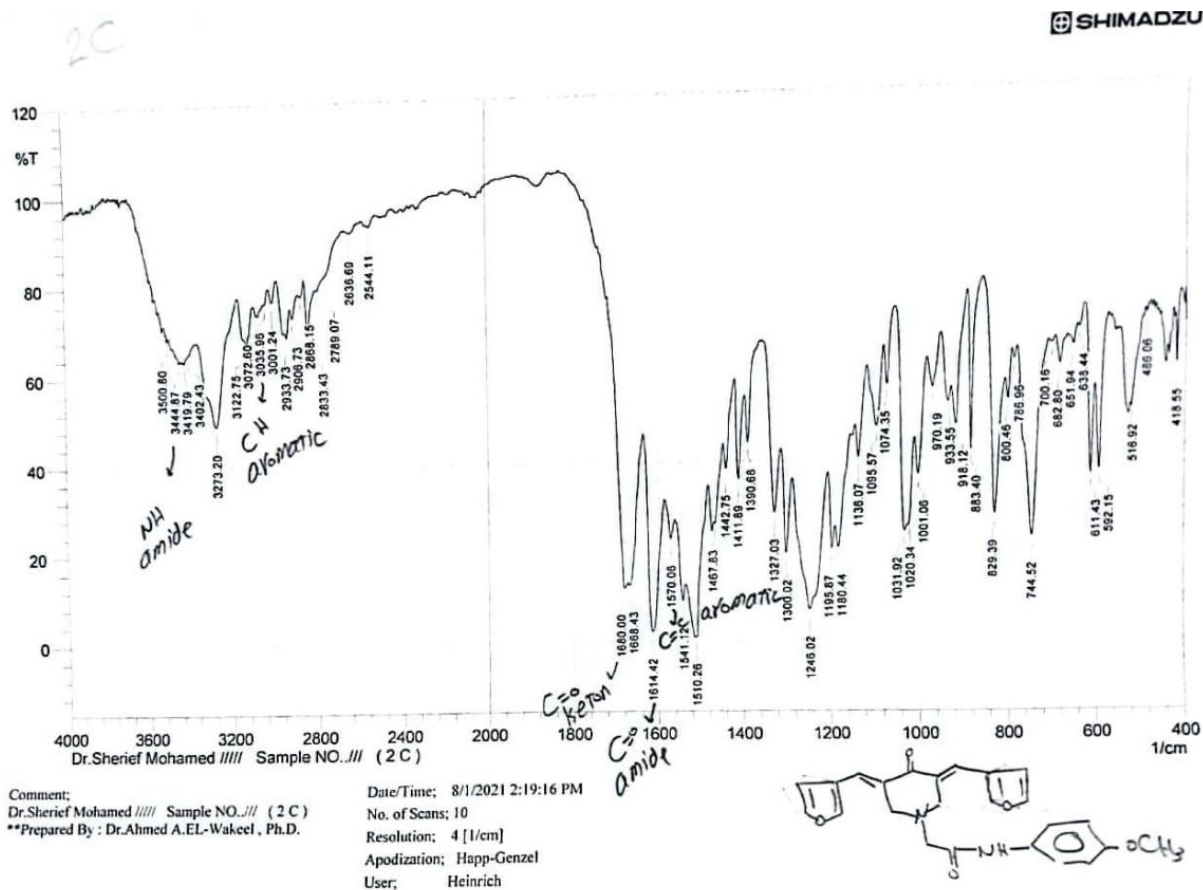

Figure S40. IR spectrum of compound 2C

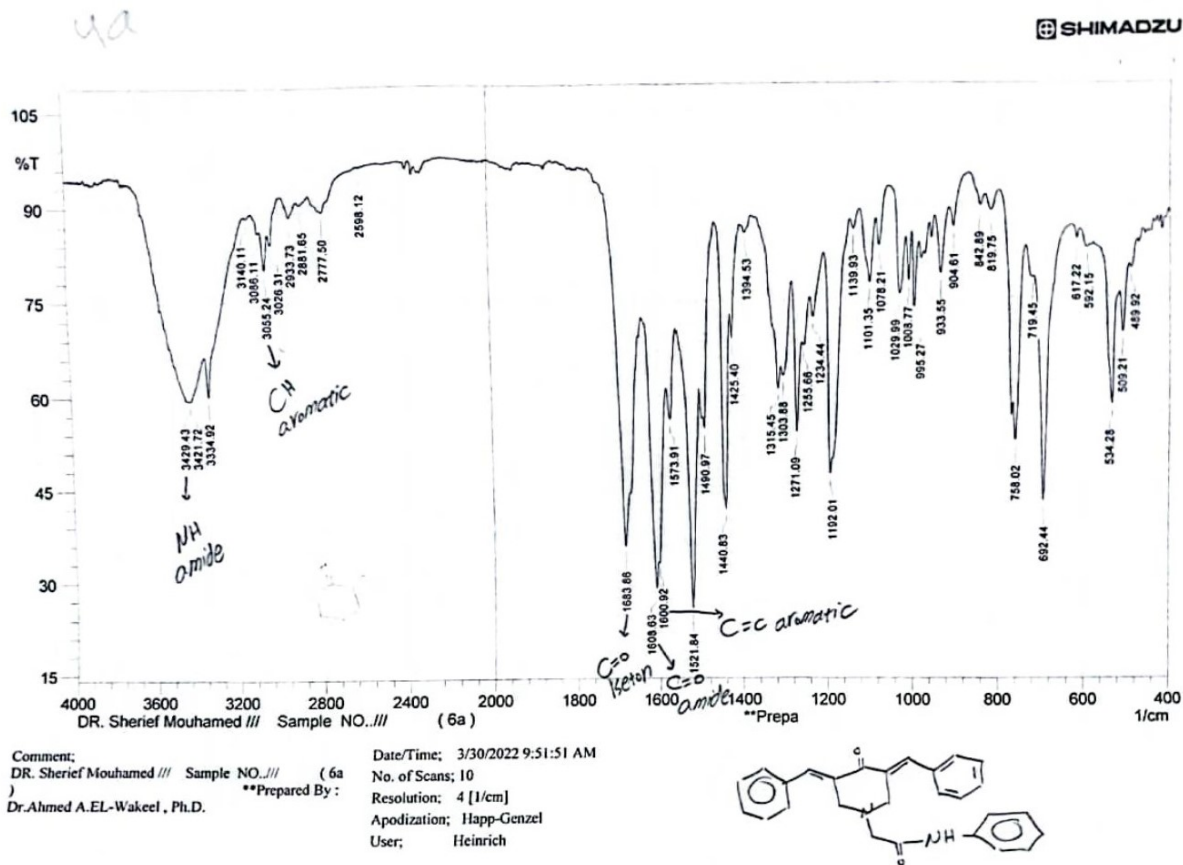

Figure S41. IR spectrum of compound 4a

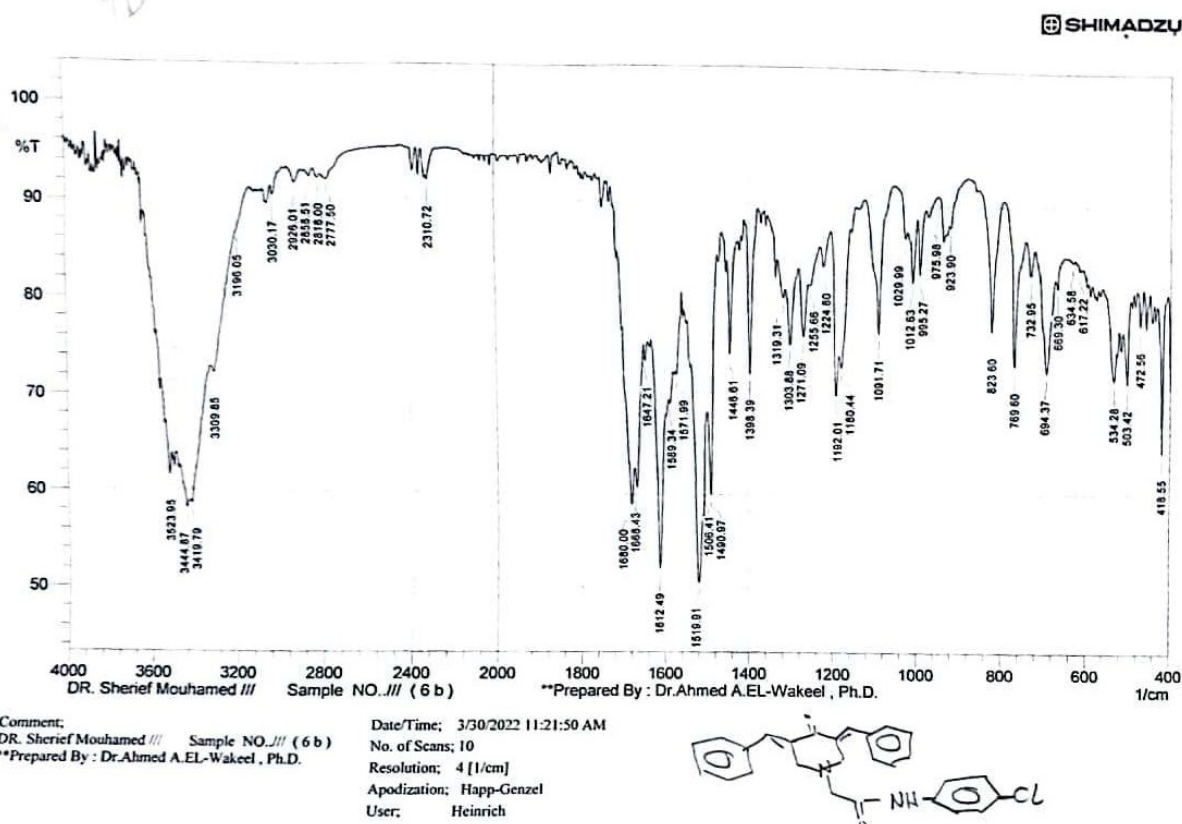

Figure S42. IR spectrum of compound 4b



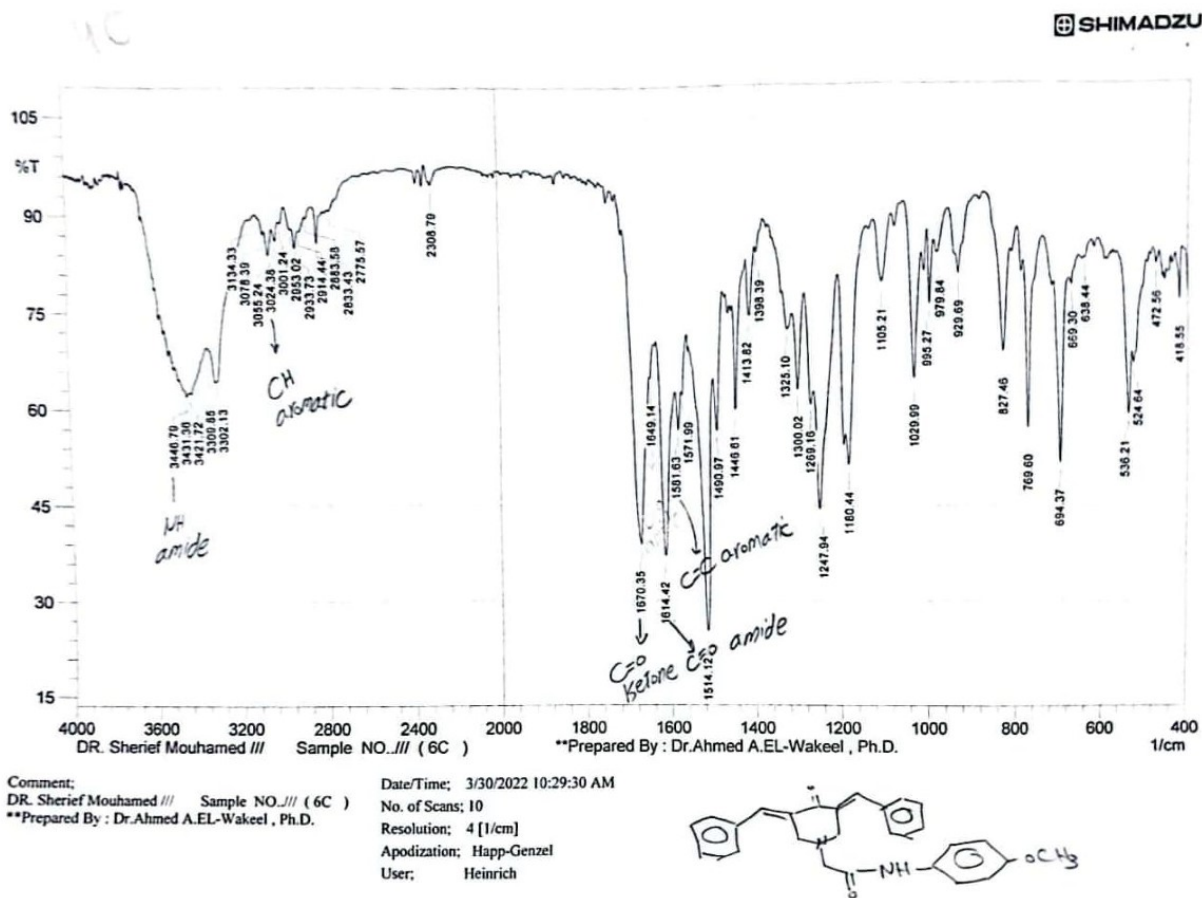

Figure S43. IR spectrum of compound 4C

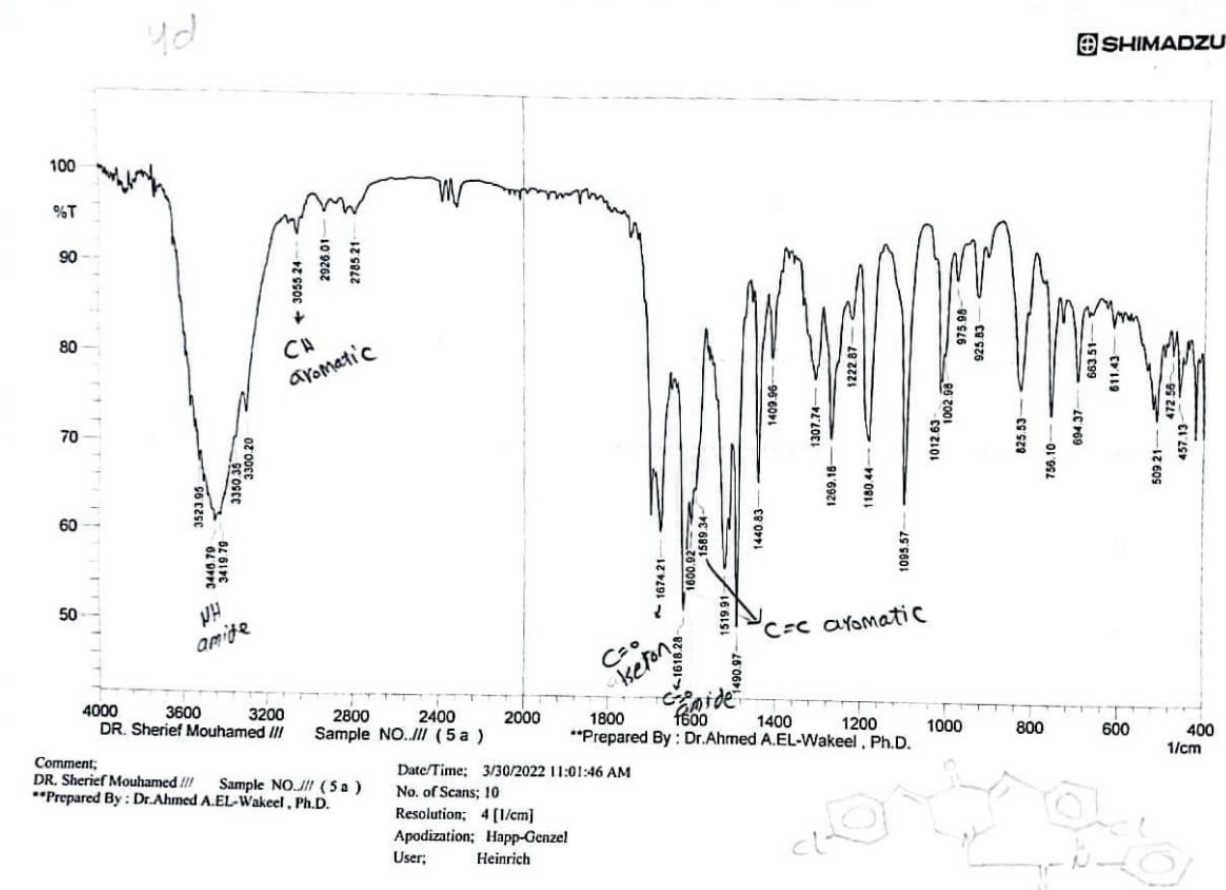

Figure S44. IR spectrum of compound 4d

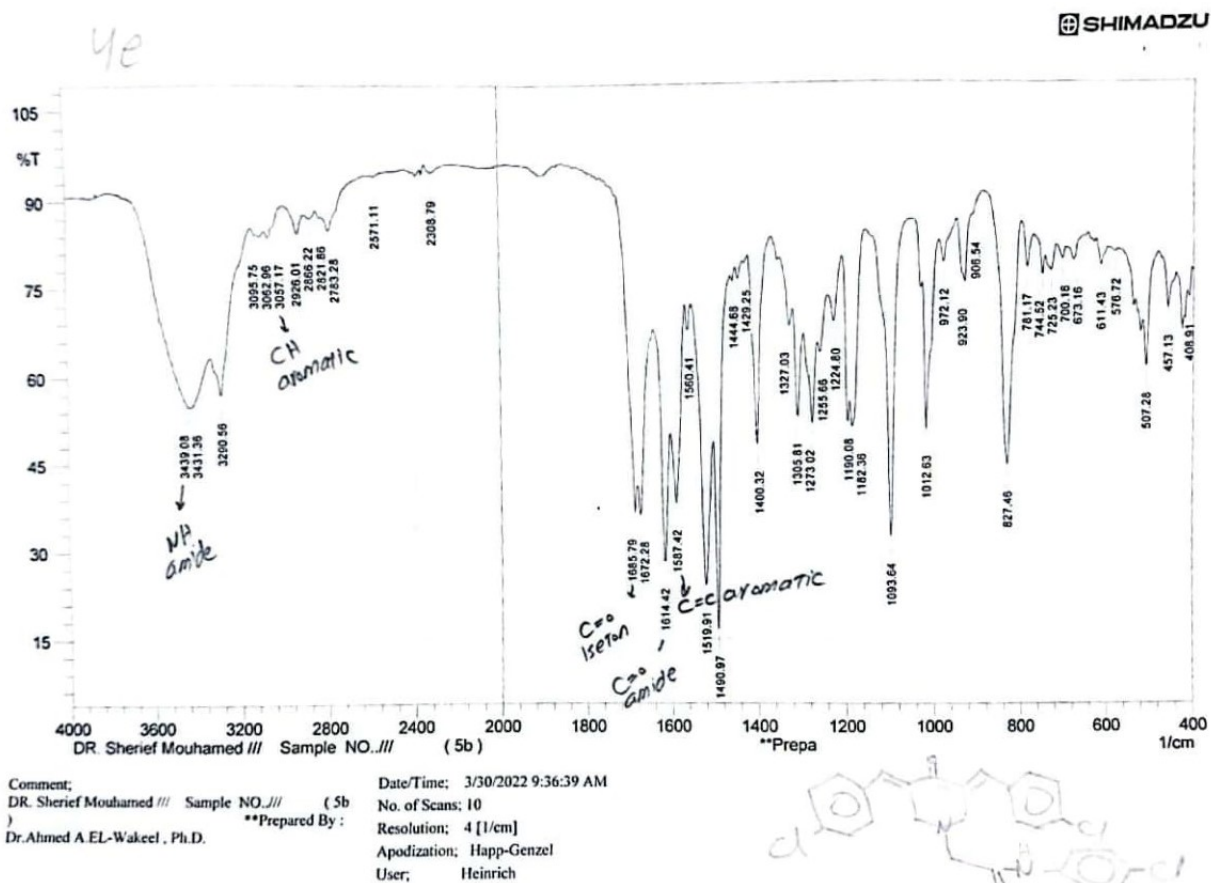

Figure S45. IR spectrum of compound 4e

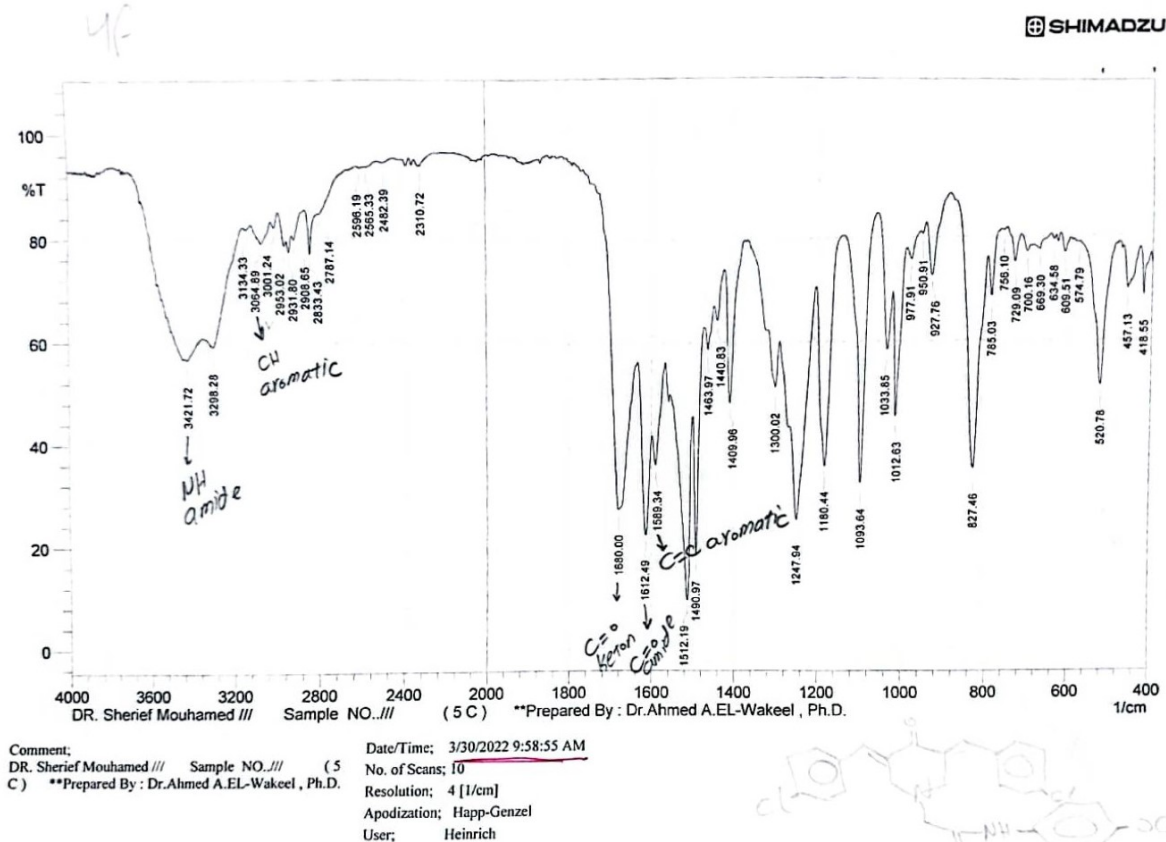

Figure S46. IR spectrum of compound 4f

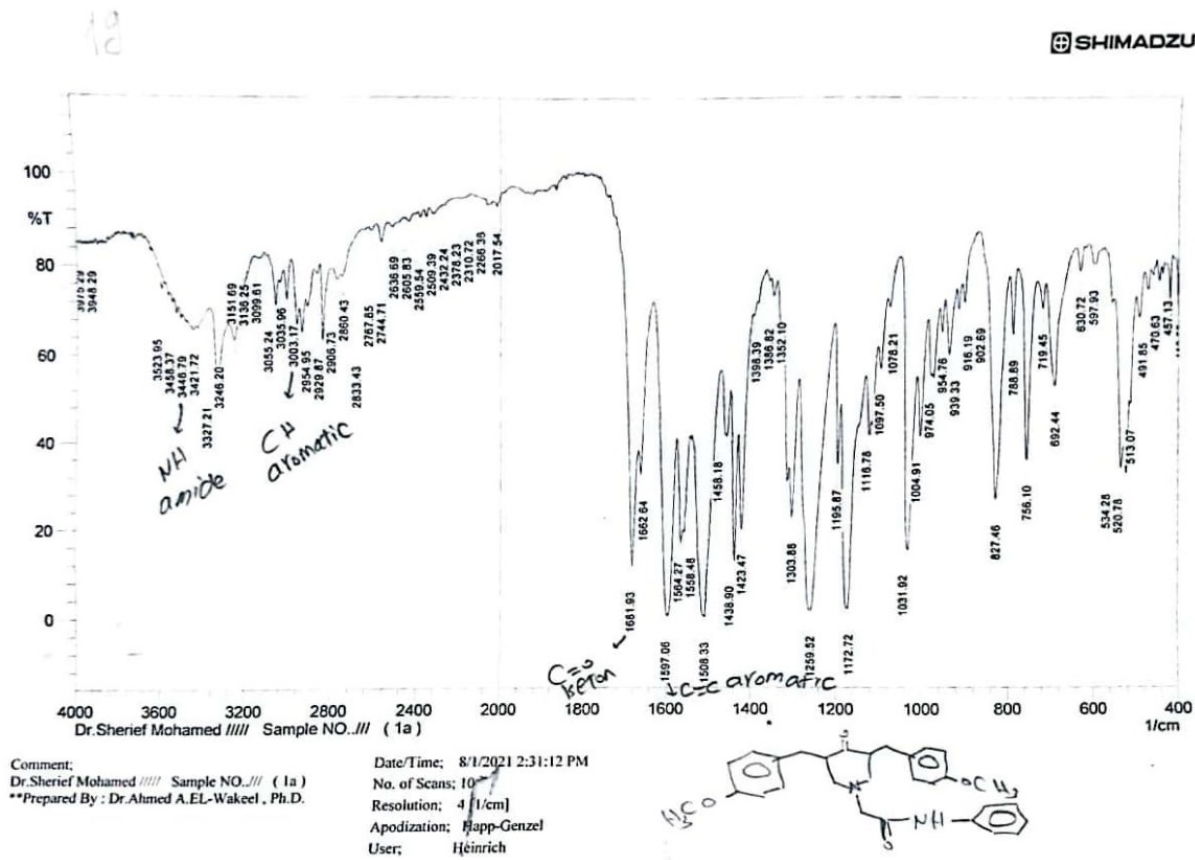

Figure S47. IR spectrum of compound 4g

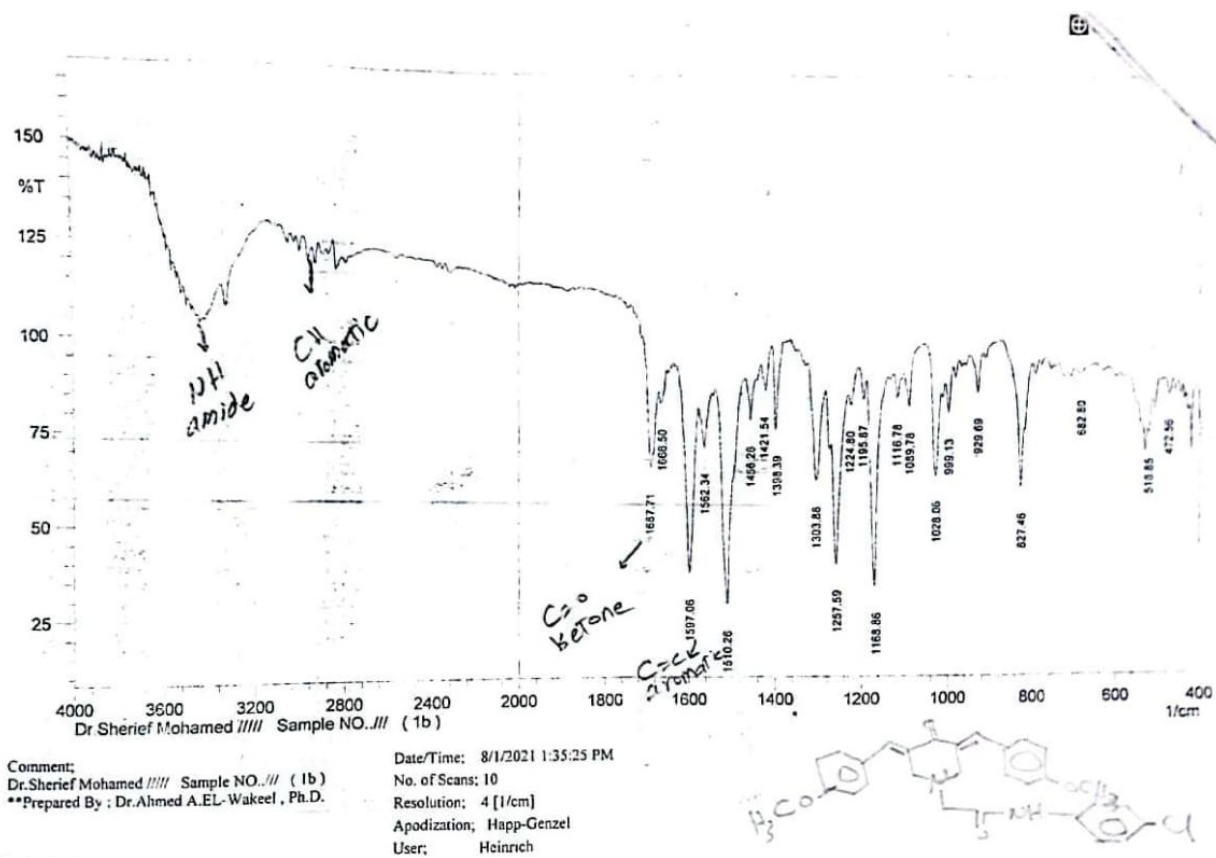

Figure S48. IR spectrum of compound 4h

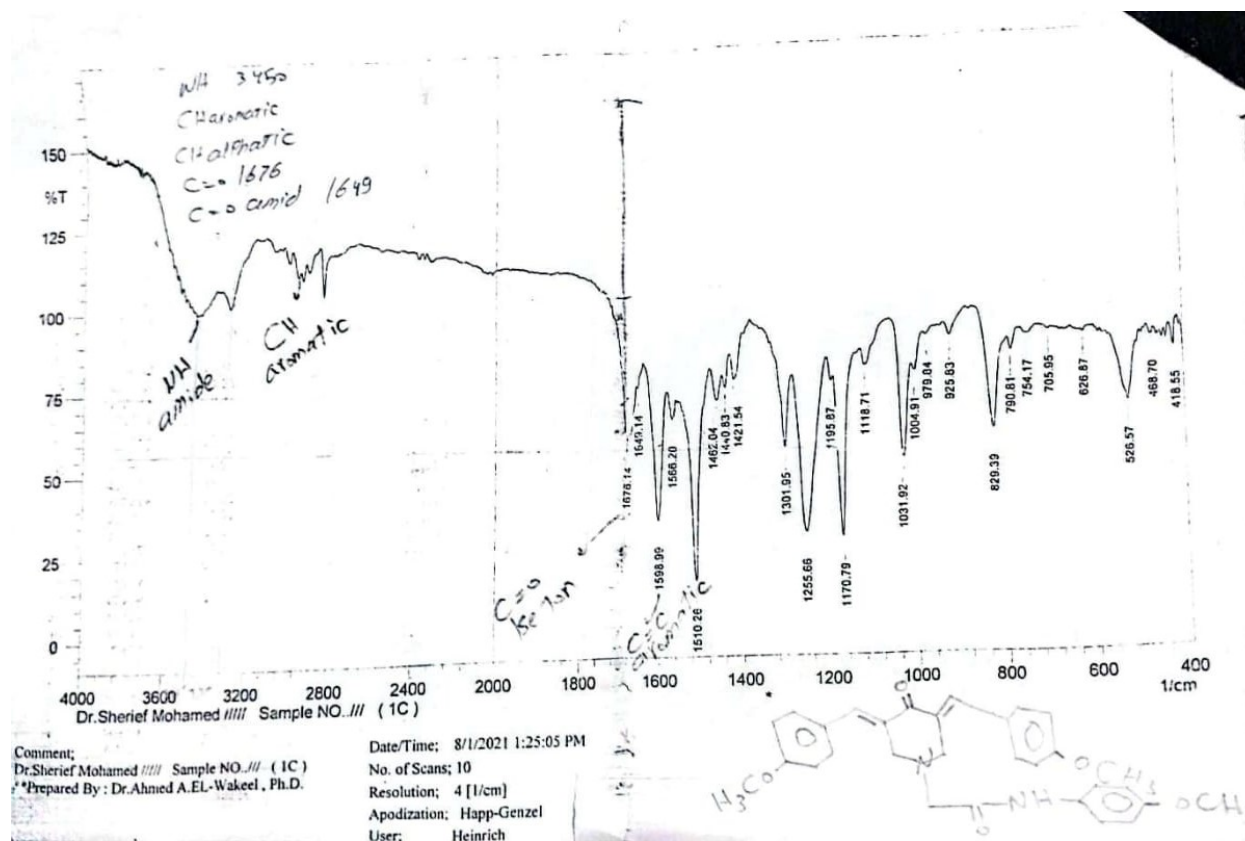

Figure S49. IR spectrum of compound 4i

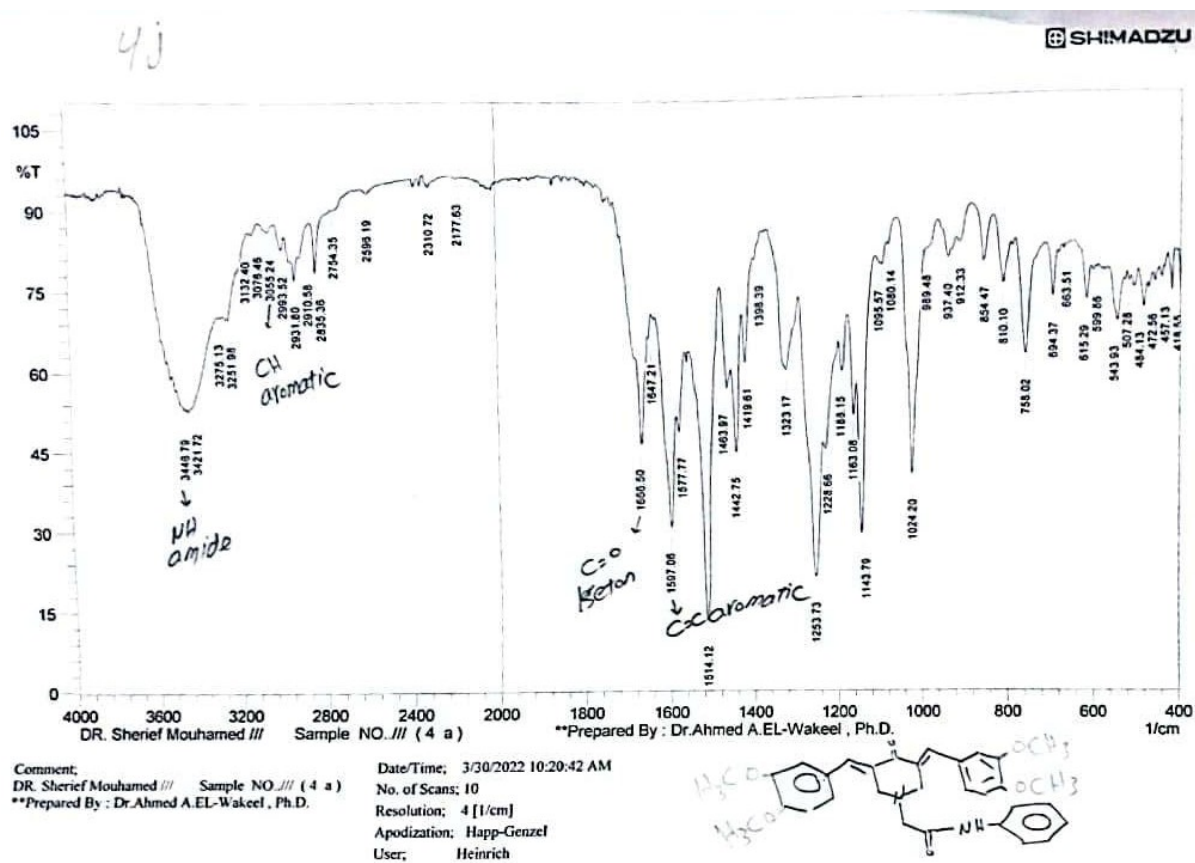

Figure S50. IR spectrum of compound 4j



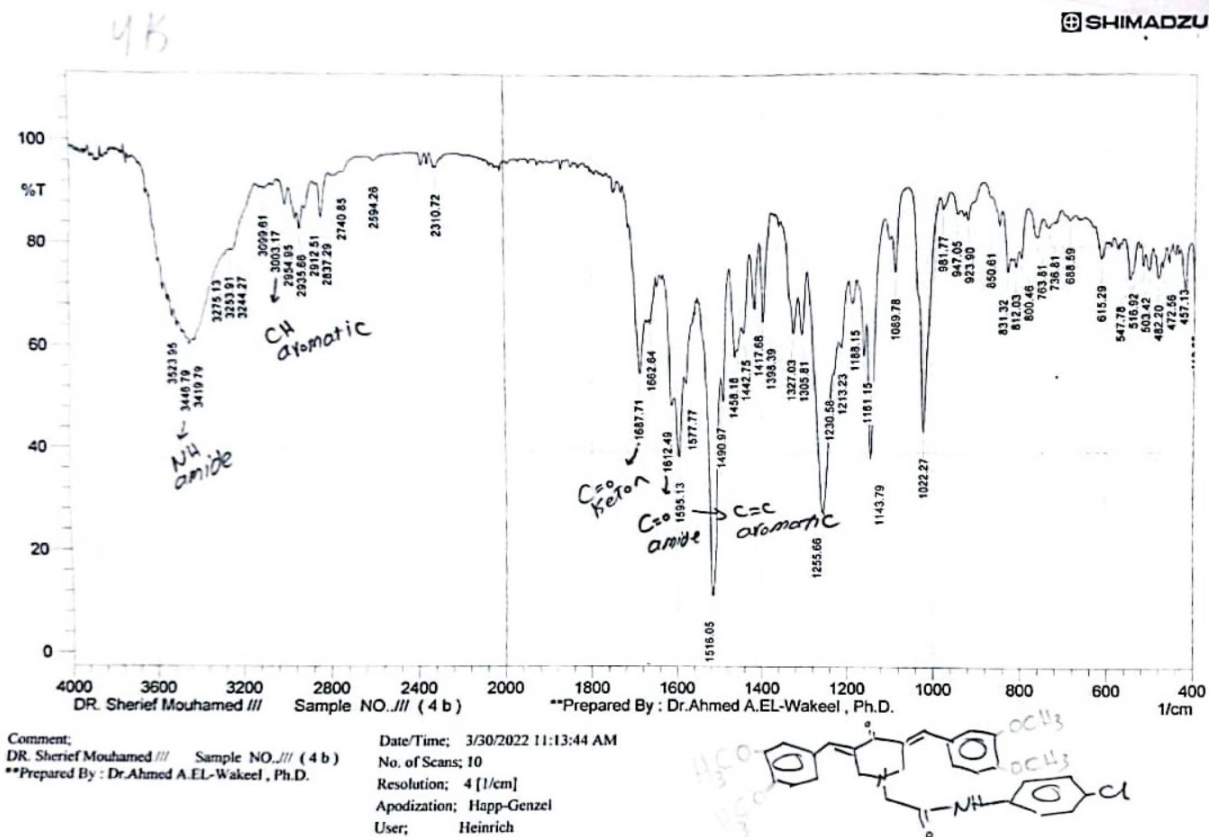

Figure S51. IR spectrum of compound 4k

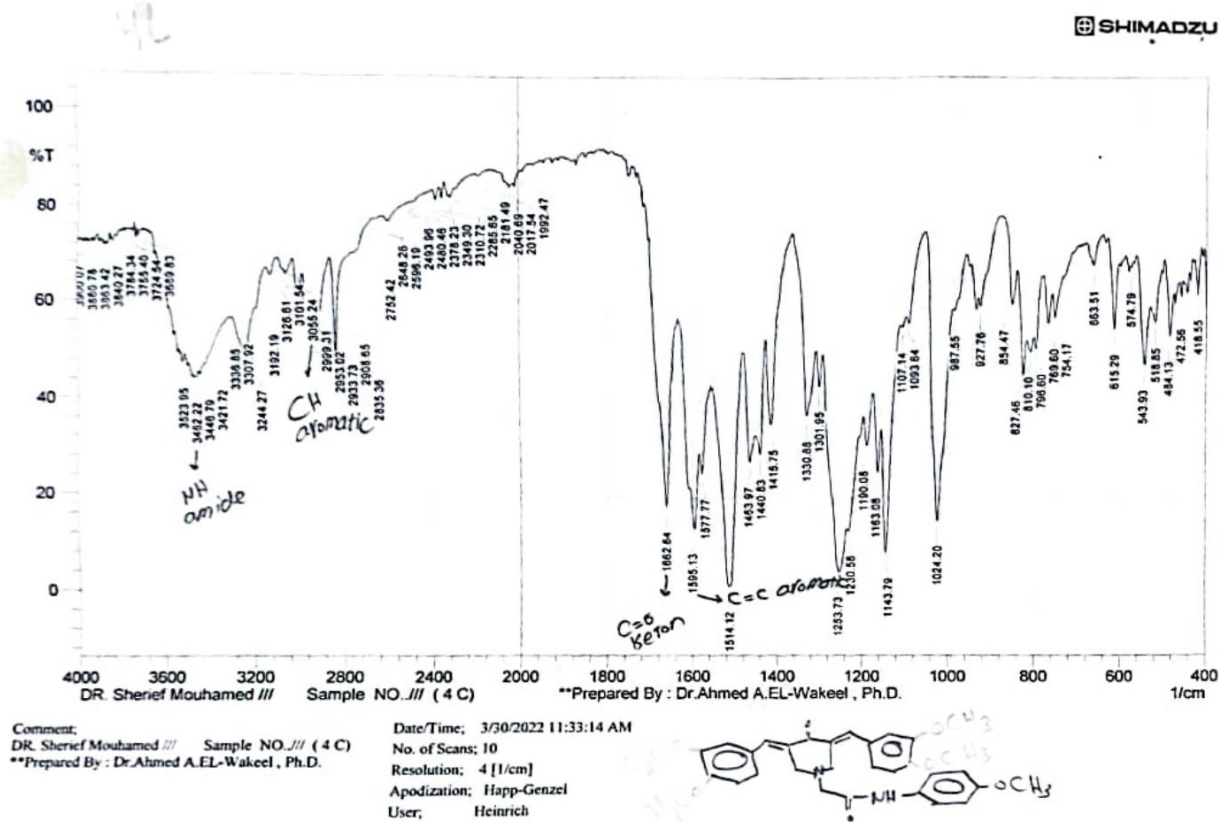

Figure S52. IR spectrum of compound 4L

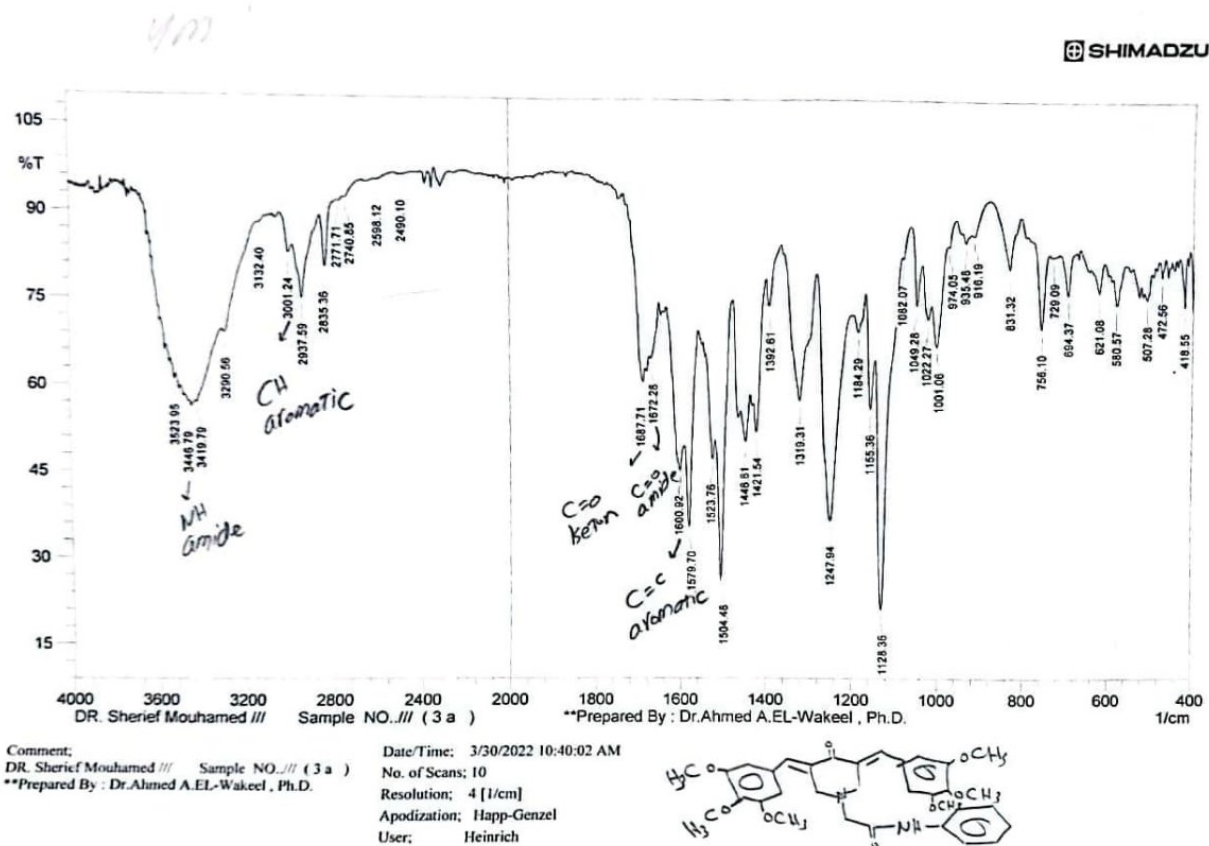

Figure S53. IR spectrum of compound 4m

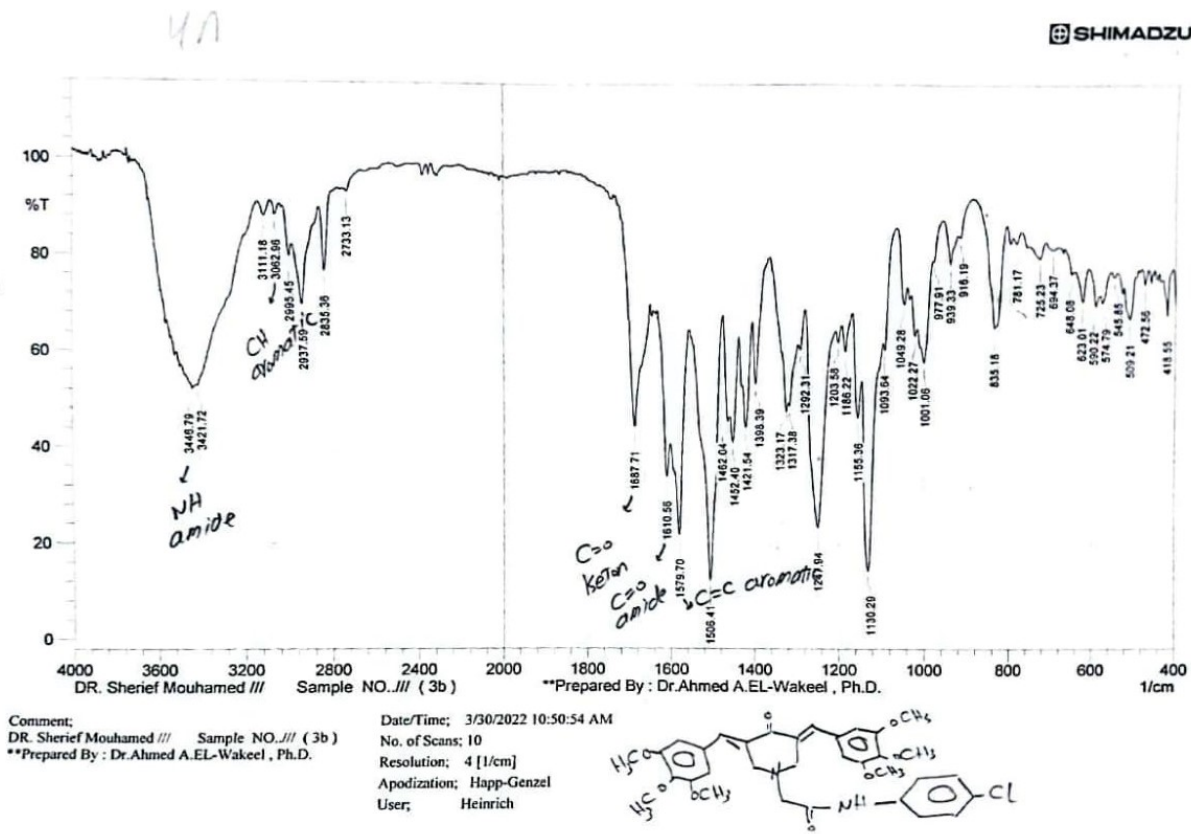

Figure S54. IR spectrum of compound 4n

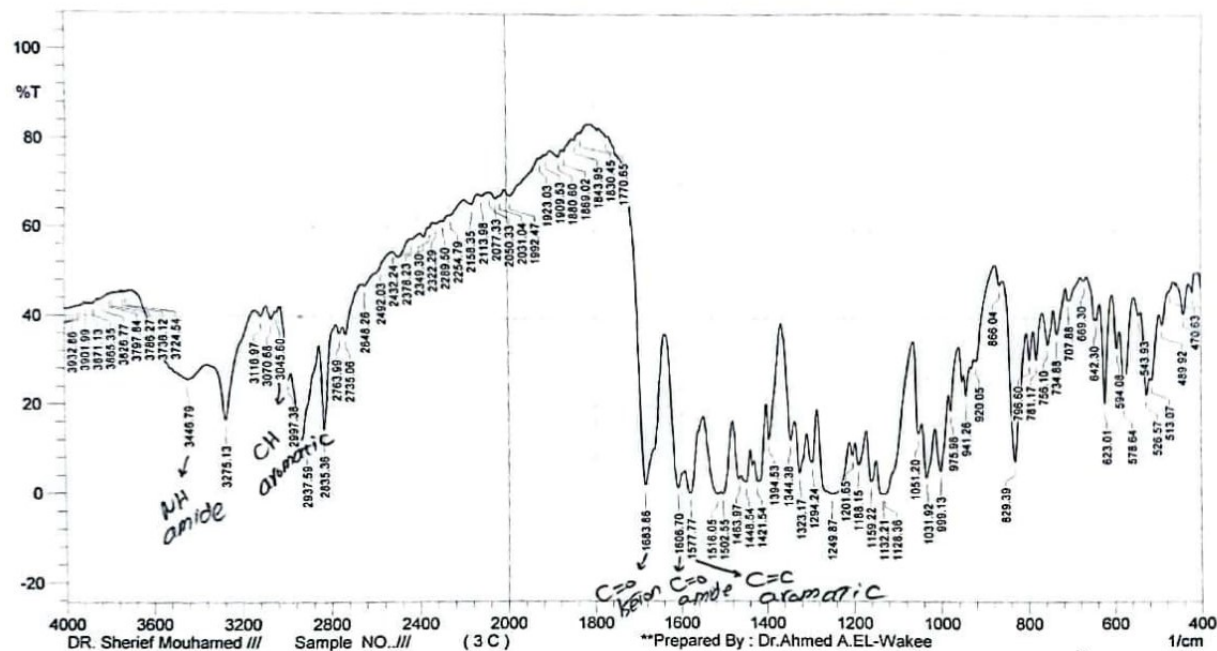

Comment;  
DR. Sherief Mouhamed /// Sample NO./// (3  
C)  
\*\*Prepared By : Dr.Ahmed A.EL-  
Wakeel , Ph.D.

Date/Time; 3/30/2022 10:12:22 AM  
No. of Scans; 10  
Resolution; 4 [1/cm]  
Apodization; Happ-Genzel  
User; Heinrich

\*\*Prepared By : Dr.Ahmed A.EL-Wakeel

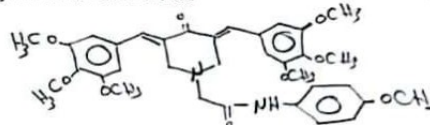

Figure S55. IR spectrum of compound 40

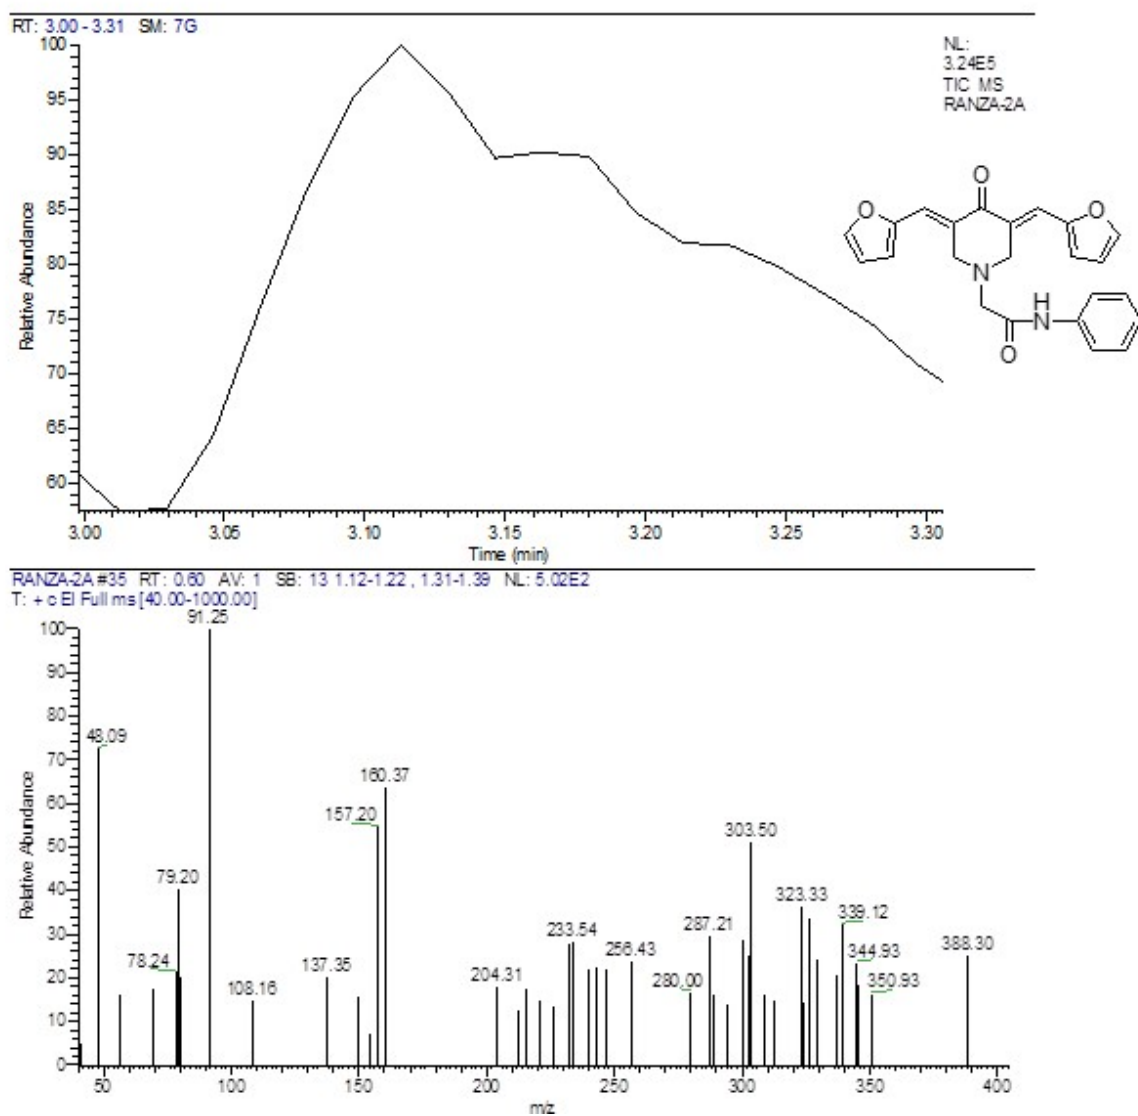

Figure S56. Mass spectrum of compound 2a

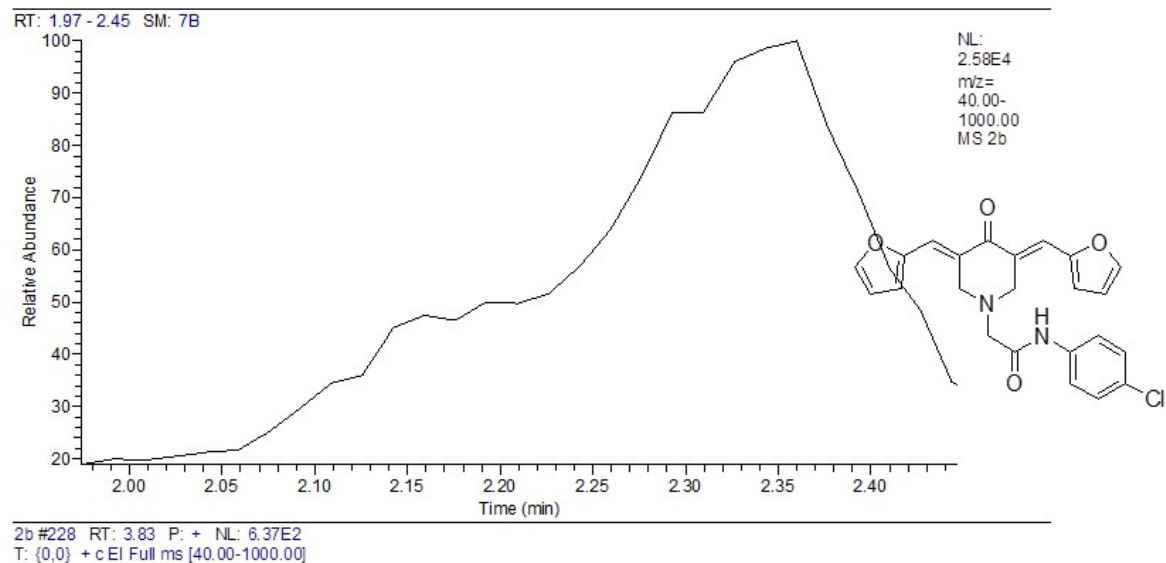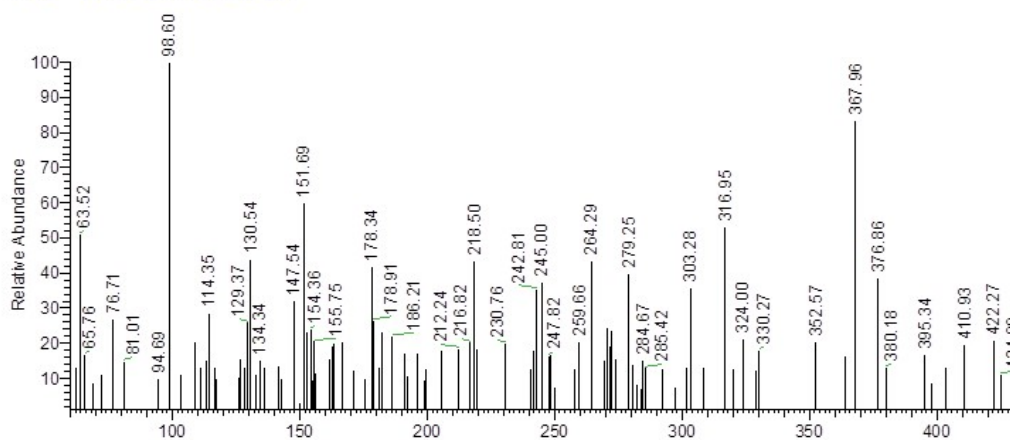

Figure S57. Mass spectrum of compound 2b

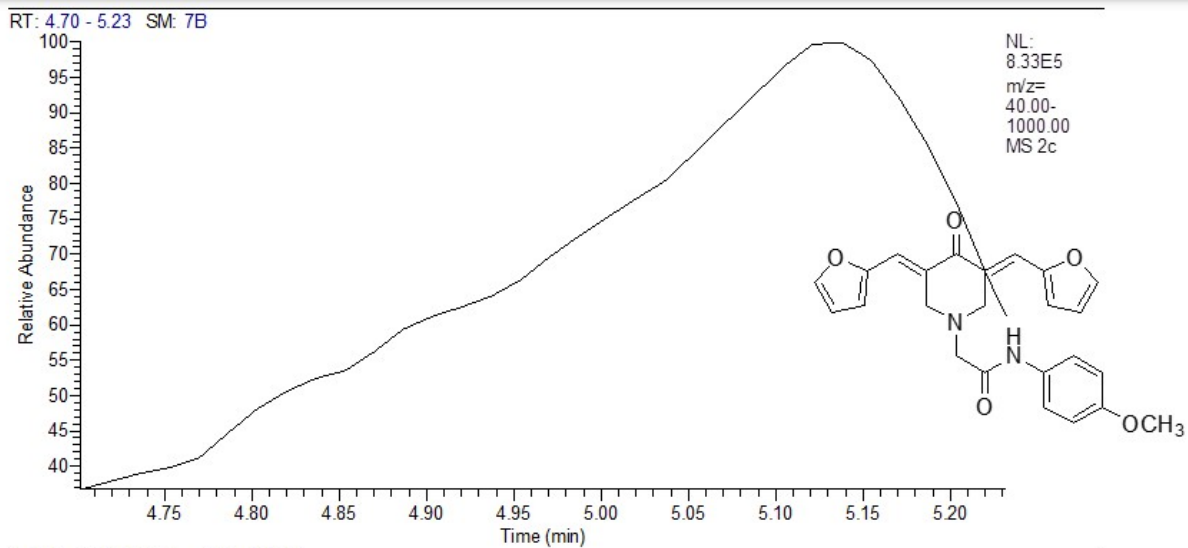

2c #31 RT: 0.54 P: + NL: 4.01E2  
T: {0,0} + c EI Full ms [40.00-1000.00]

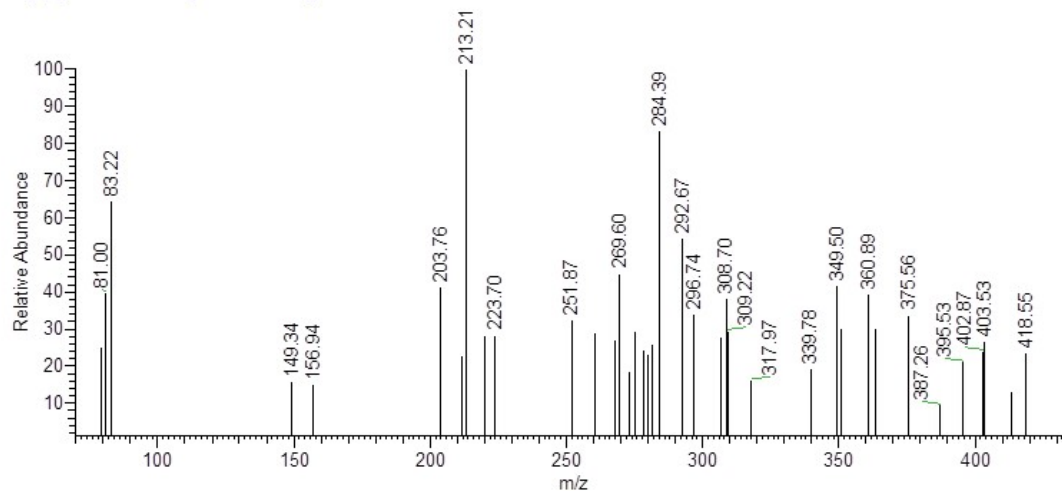

Figure S58. Mass spectrum of compound 2c



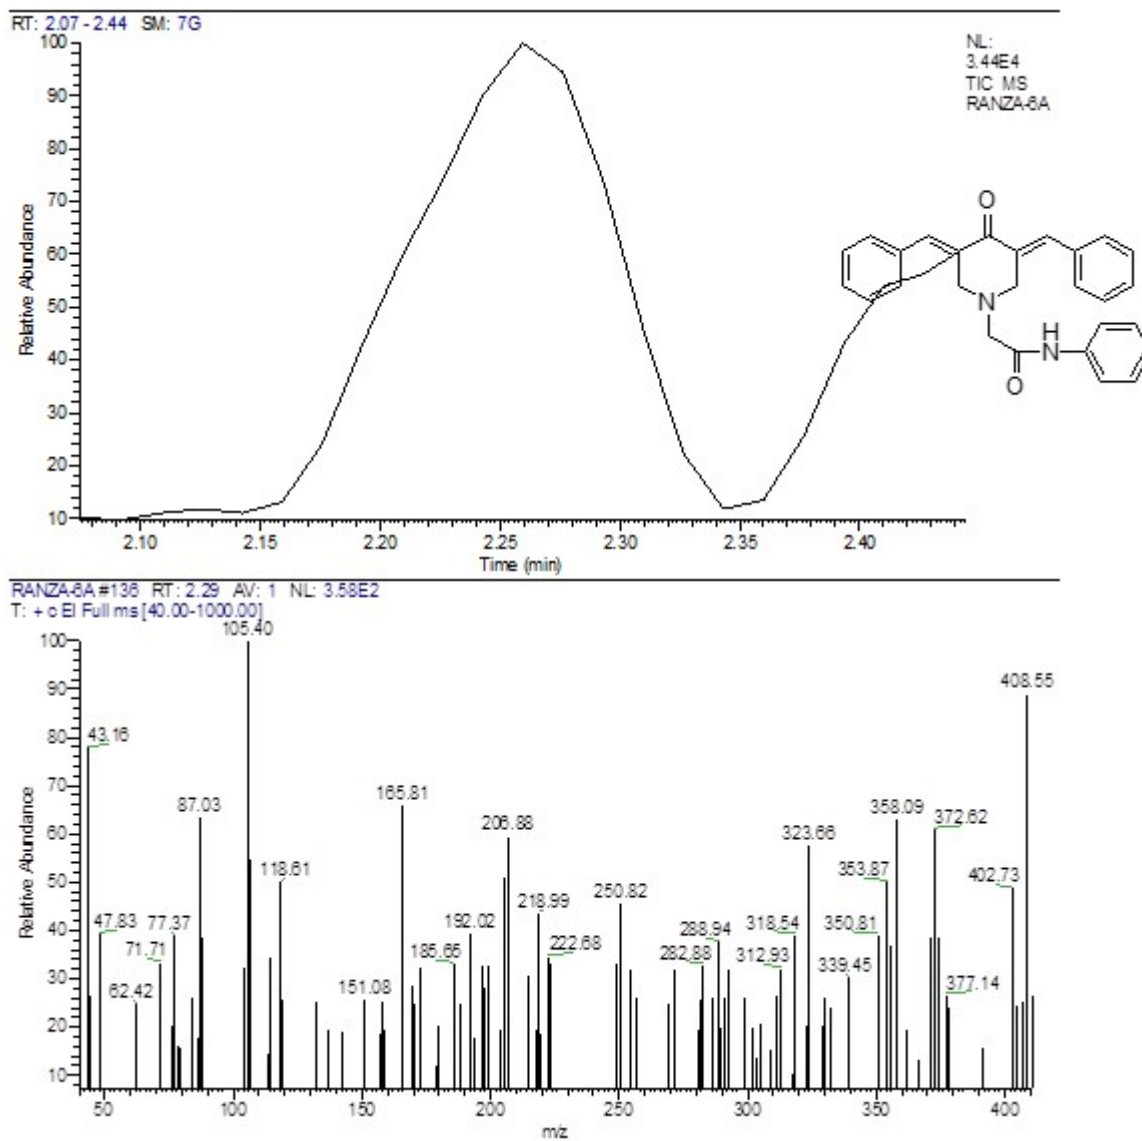

Figure S59. Mass spectrum of compound 4a

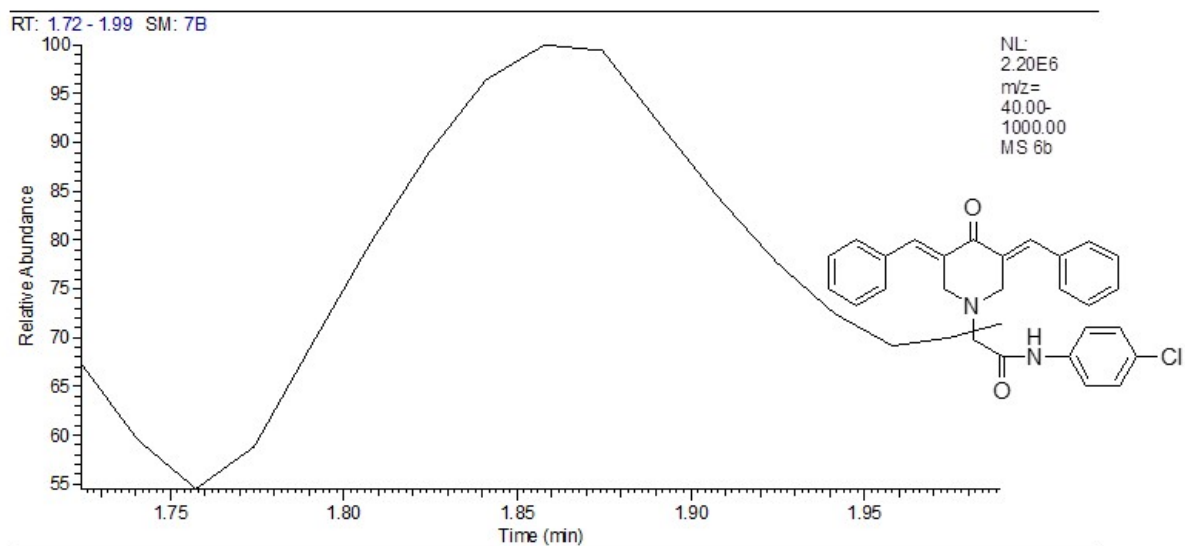

6b #164 RT: 2.76 P: + NL: 4.86E2  
T: {0.0} + c EI Full ms [40.00-1000.00]

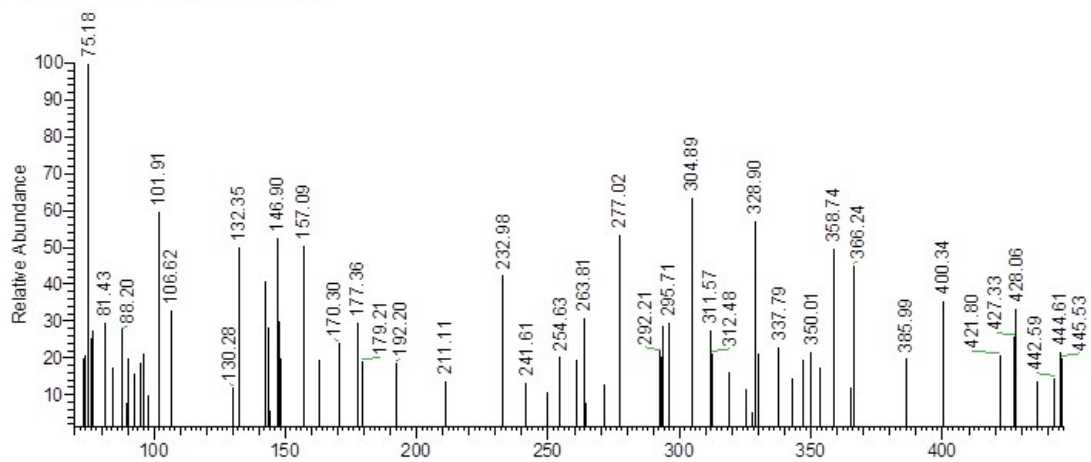

**Figure S60. Mass spectrum of compound 4b**

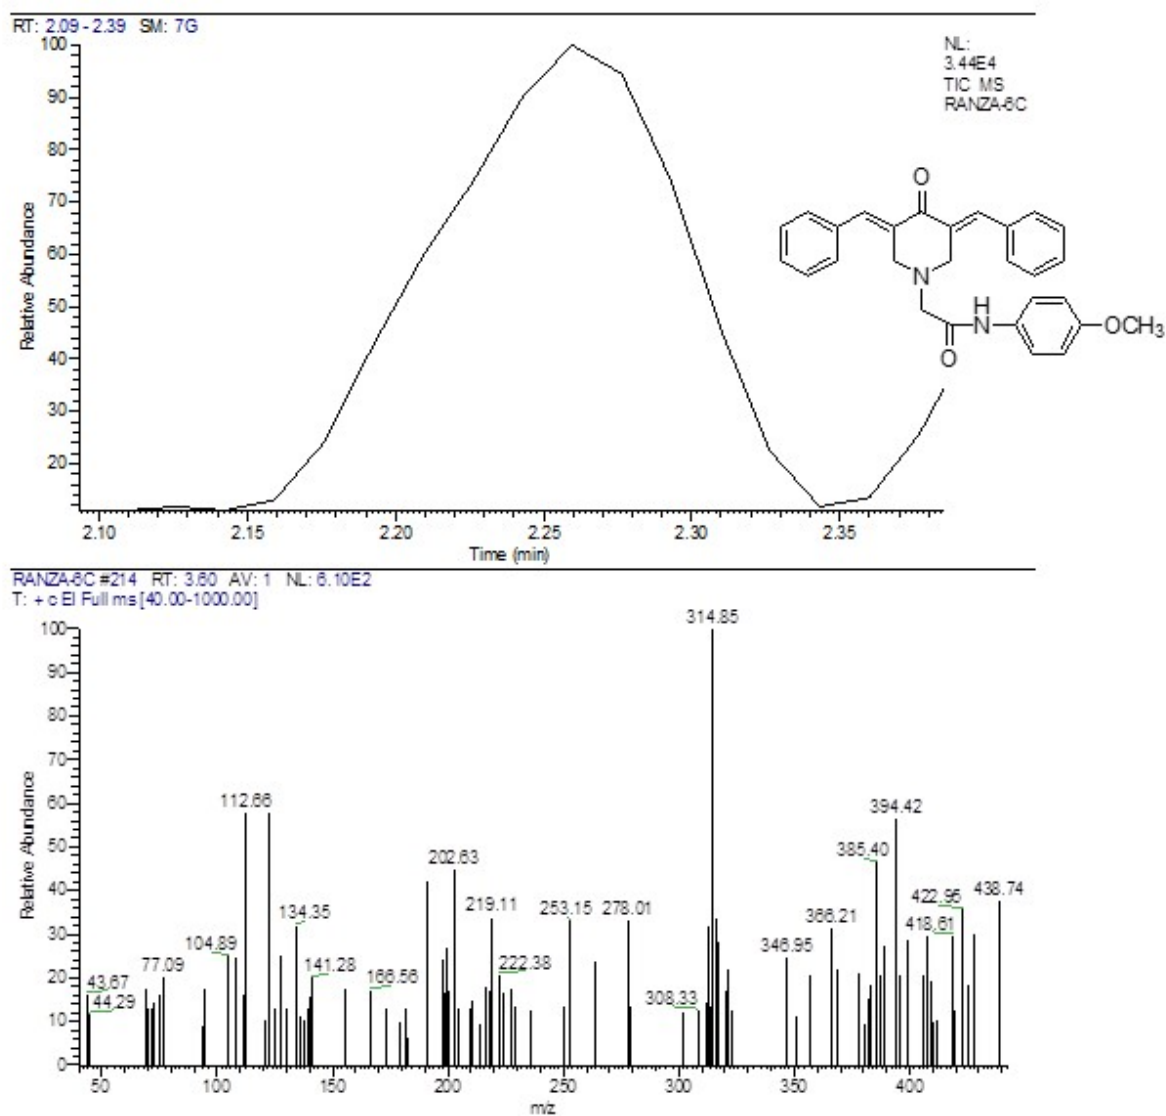

Figure S61. Mass spectrum of compound 4c

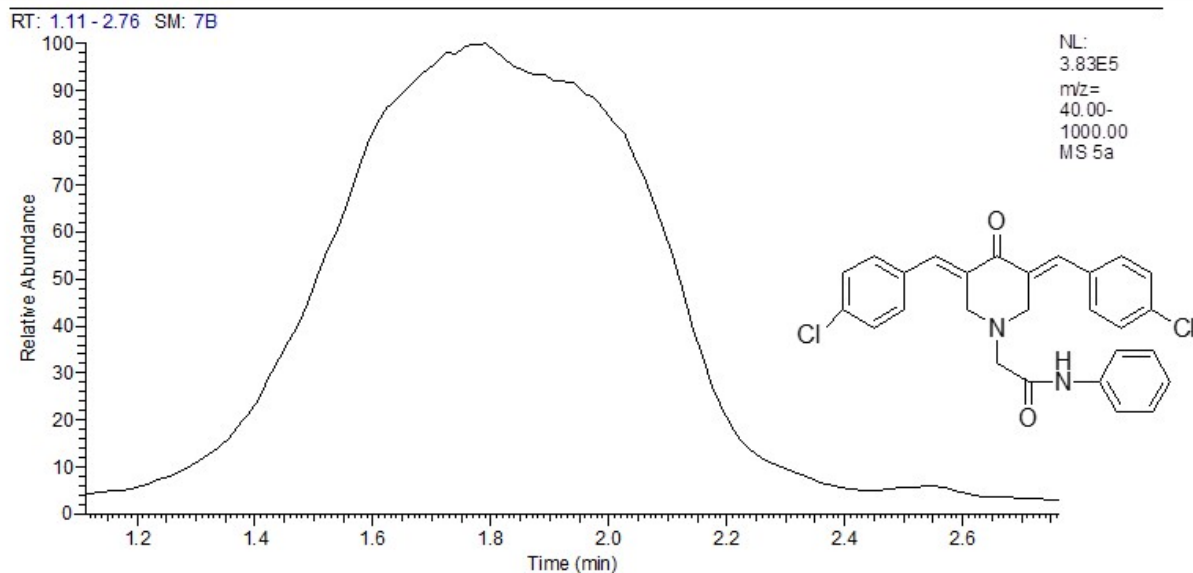

5a #182 RT: 3.06 P: + NL: 5.59E2  
T: {0,0} + cEI Full ms [40.00-1000.00]

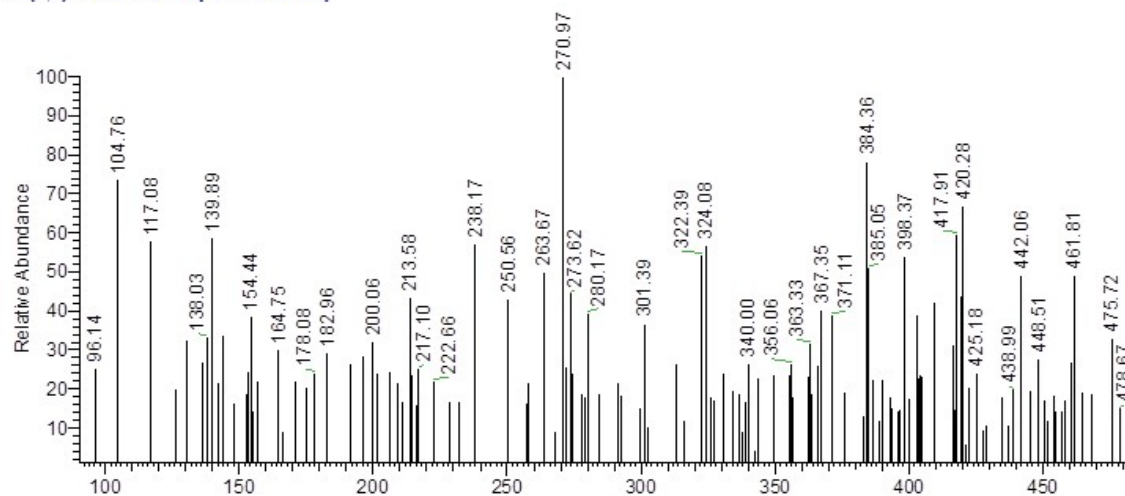

Figure S62. Mass spectrum of compound 4d

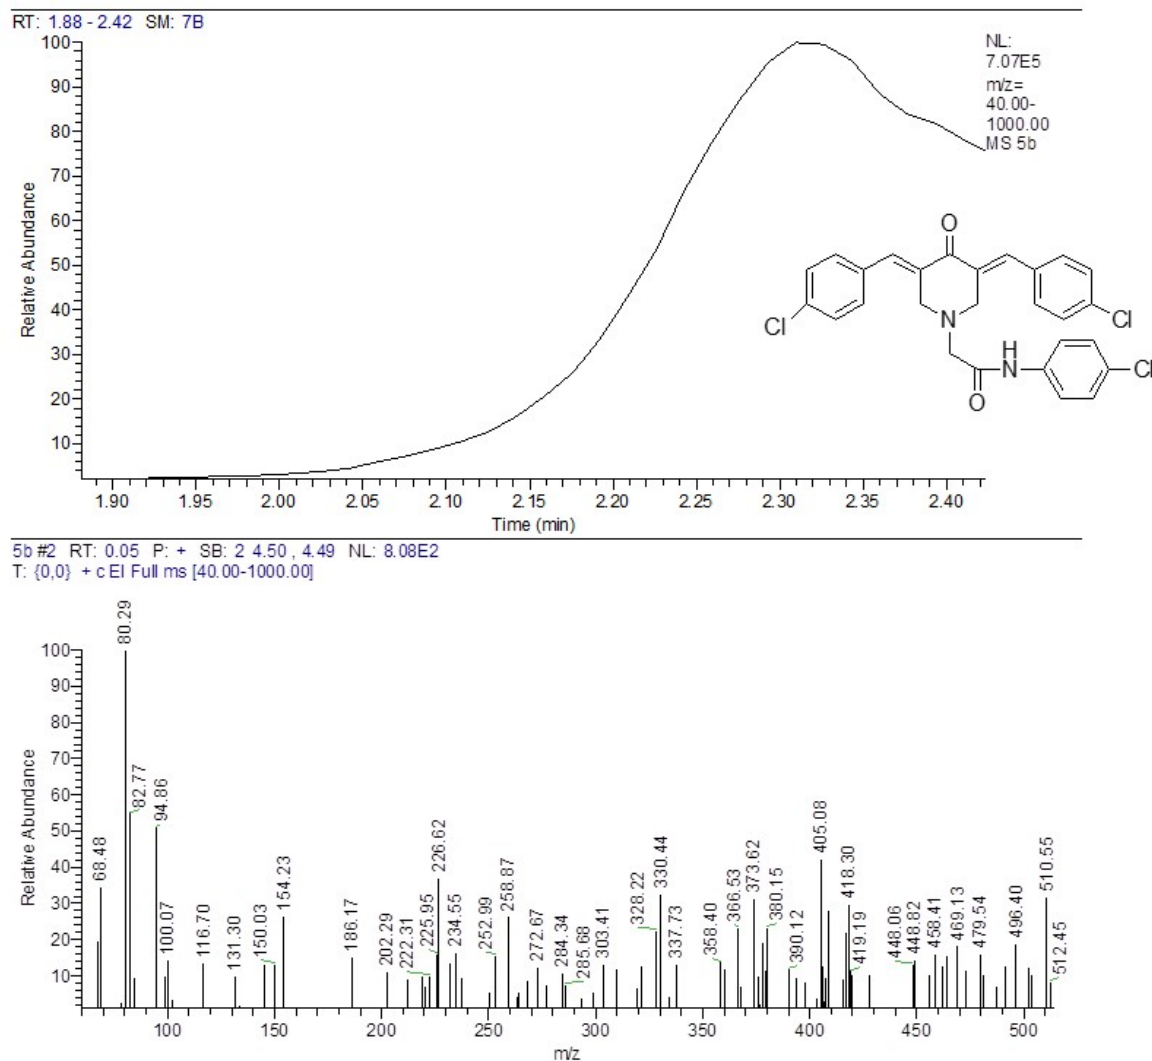

Figure S63. Mass spectrum of compound 4e

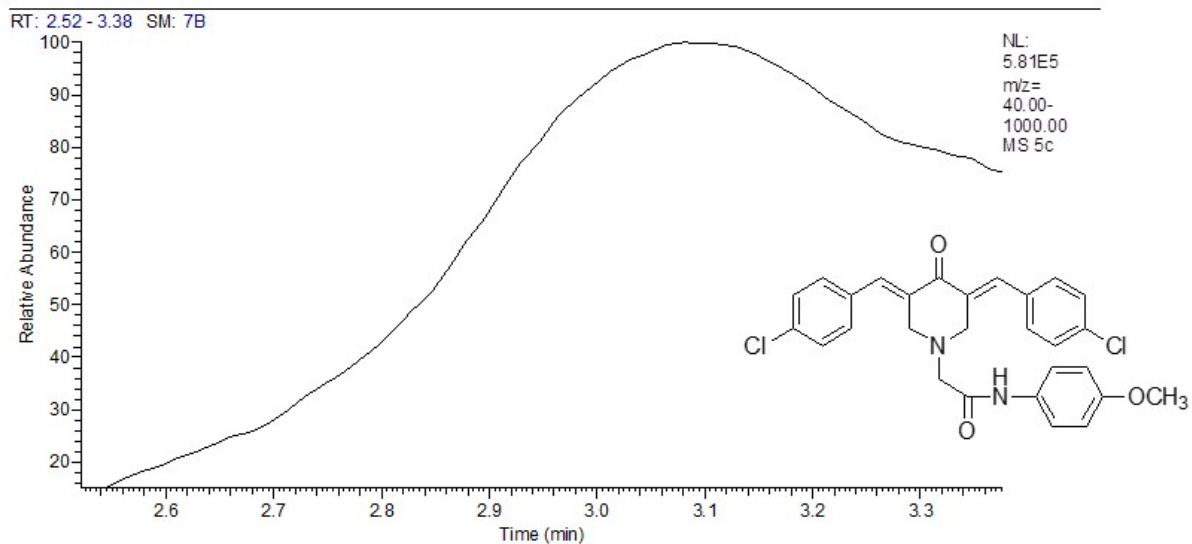

5c#126 RT: 2.13 P: + SB: 2 1.49, 1.51 NL: 1.09E3  
T: {0,0} + c EI Full ms [40.00-1000.00]

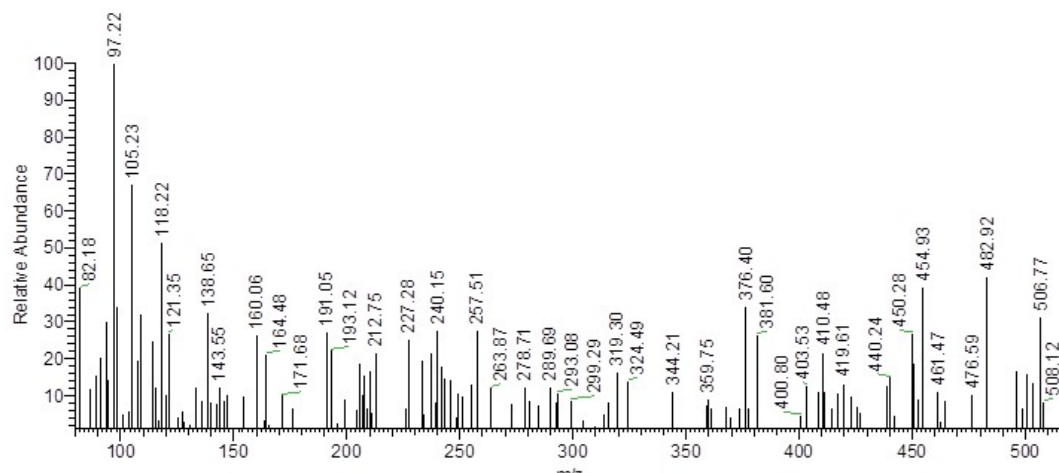

Figure S64. Mass spectrum of compound 4f

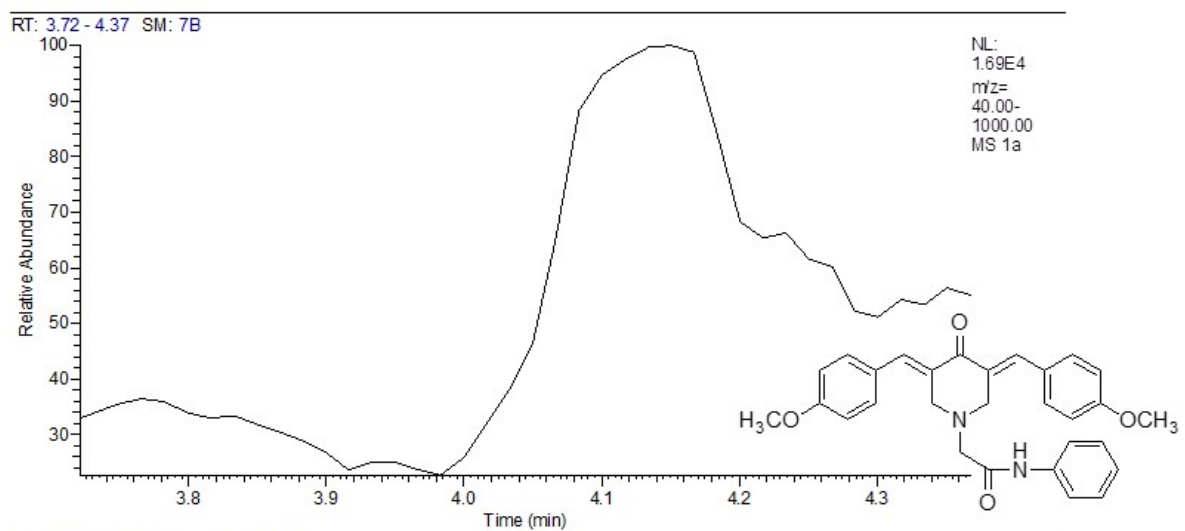

1a #115 RT: 1.94 P: + NL: 4.07E2  
T: {0,0} + c EI Full ms [40.00-1000.00]

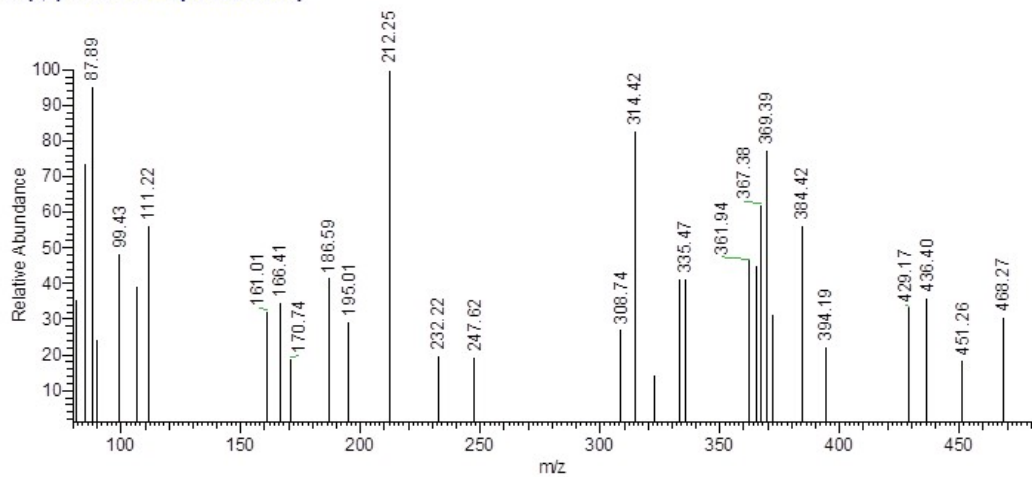

**Figure S65. Mass spectrum of compound 4g**

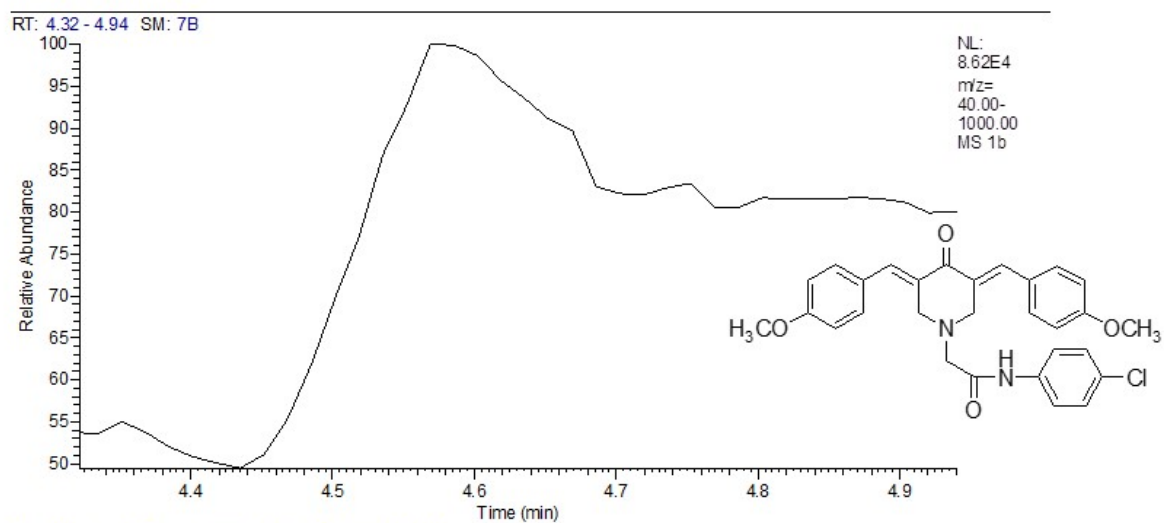

1b #272 RT: 4.57 P: + SB: 2 2.06, 2.03 NL: 1.44E3  
T: {0,0} + cEI Full ms [40.00-1000.00]

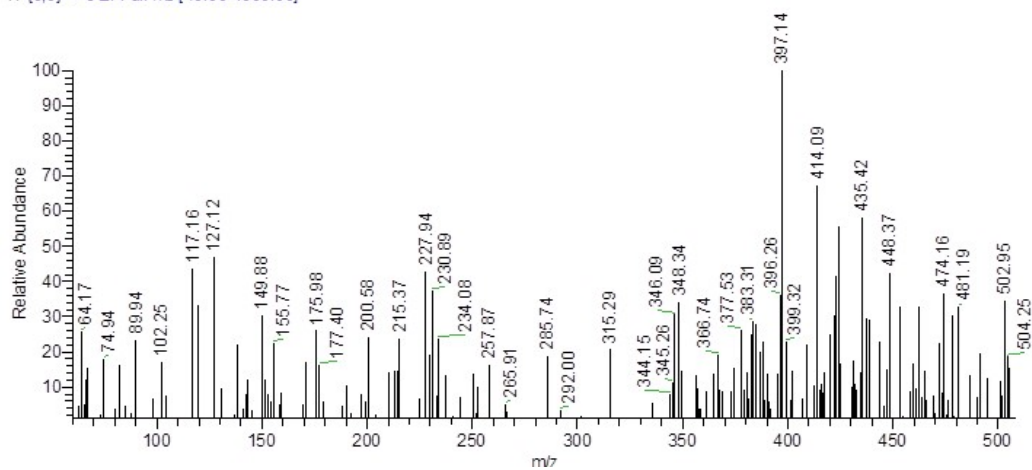

Figure S66. Mass spectrum of compound 4h



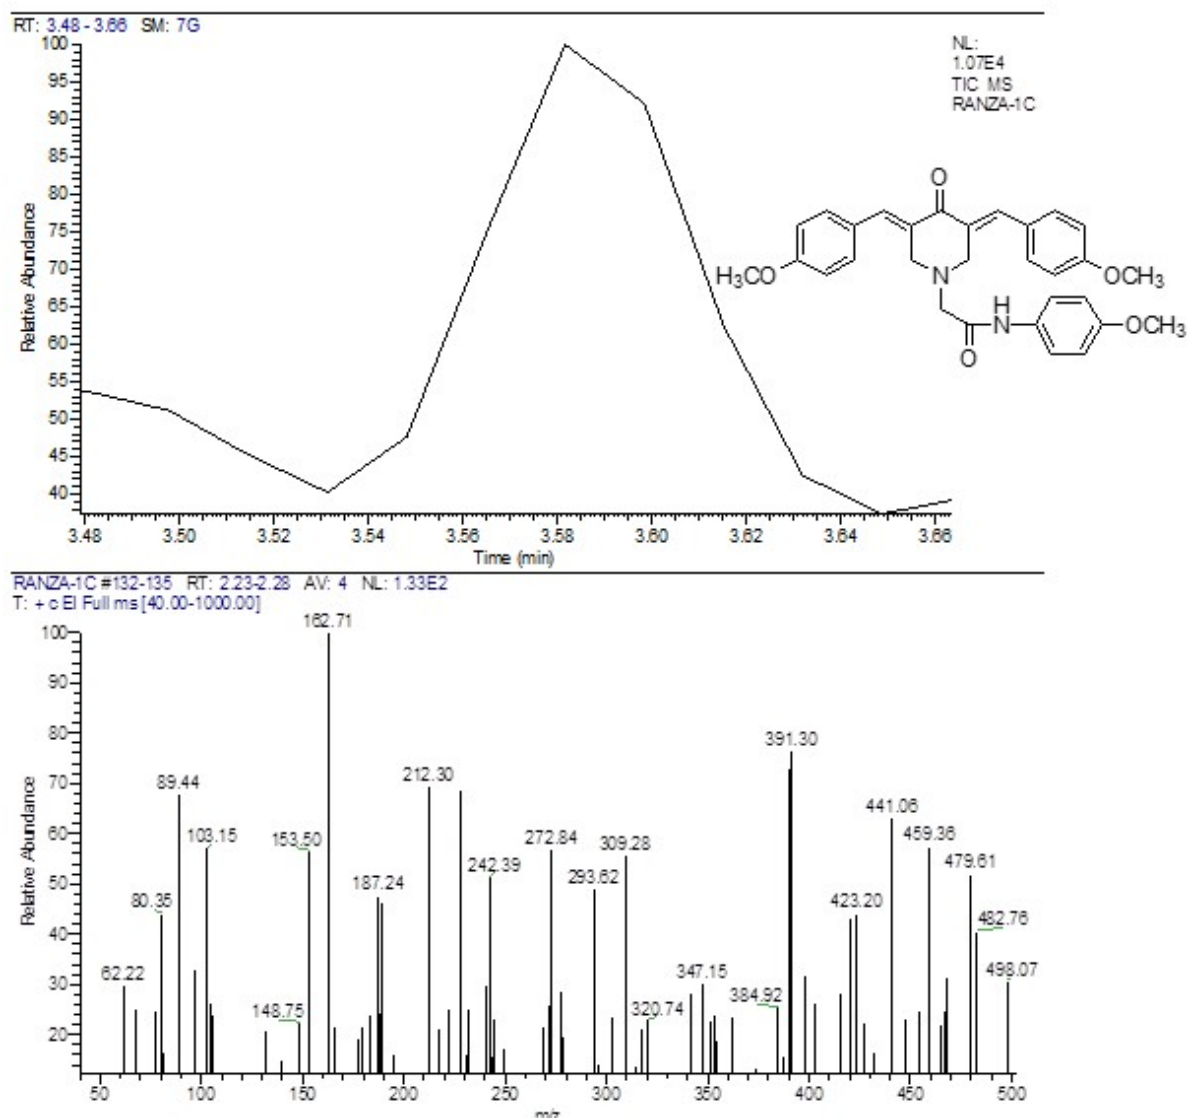

Figure S67. Mass spectrum of compound 4i

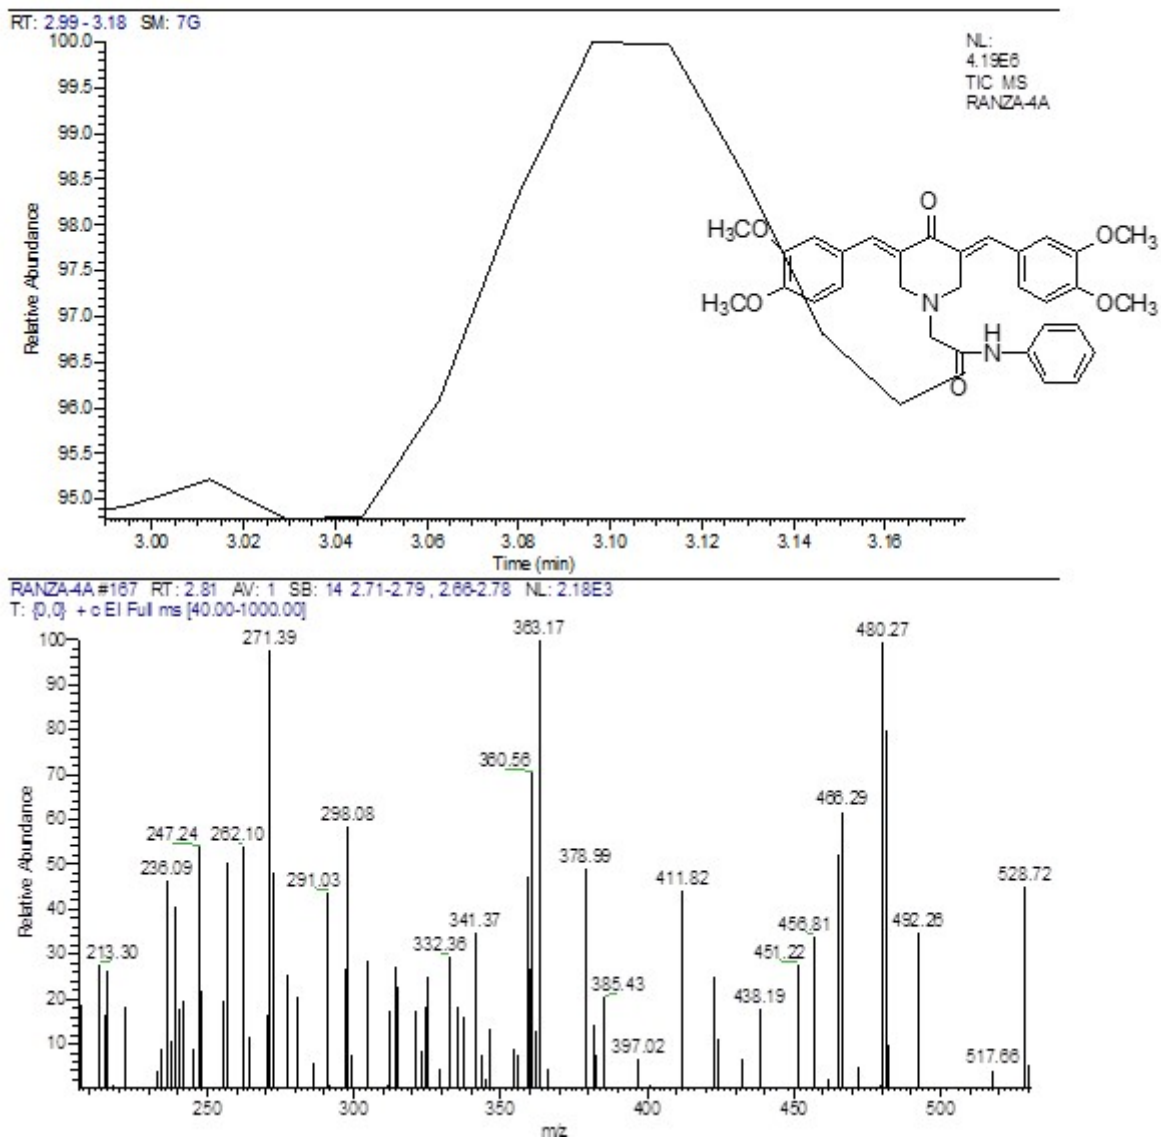

Figure S68. Mass spectrum of compound 4j

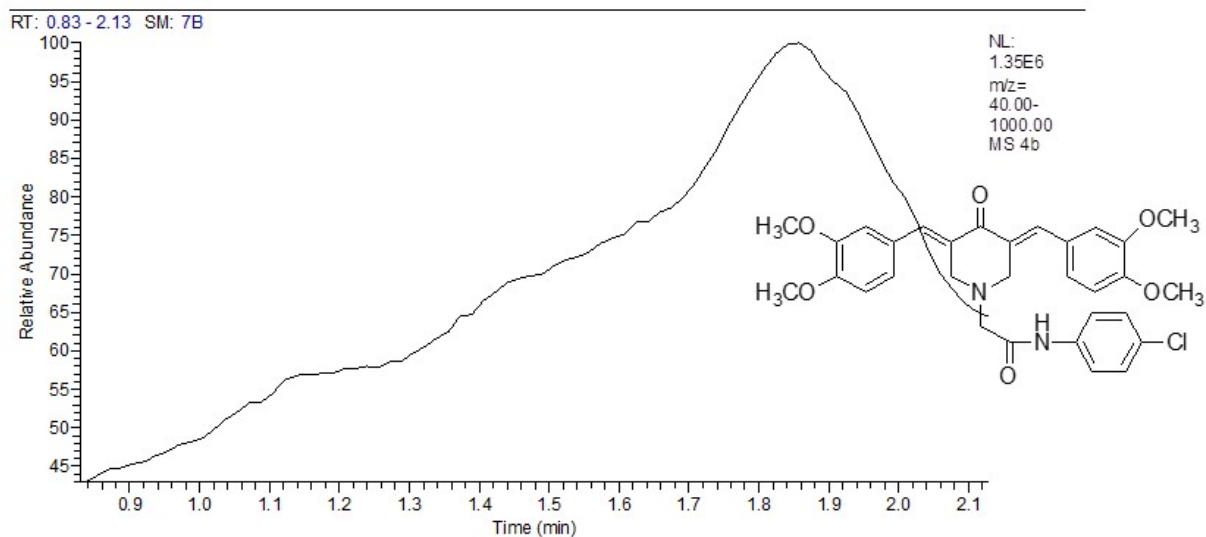

4b #298 RT: 5.00 P: + SB: 2 5.10, 5.10 NL: 3.62E3  
T: {0,0} + cEI Full ms [40.00-1000.00]

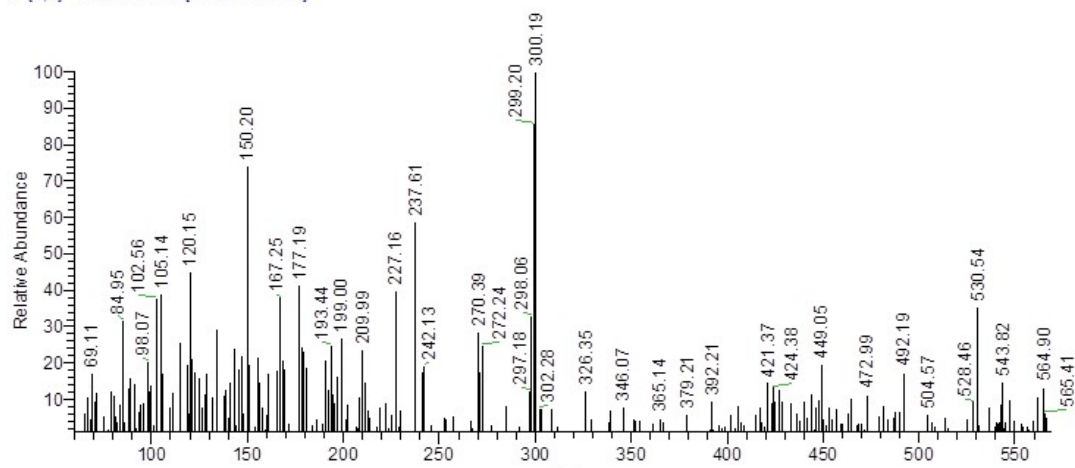

Figure S69. Mass spectrum of compound 4k

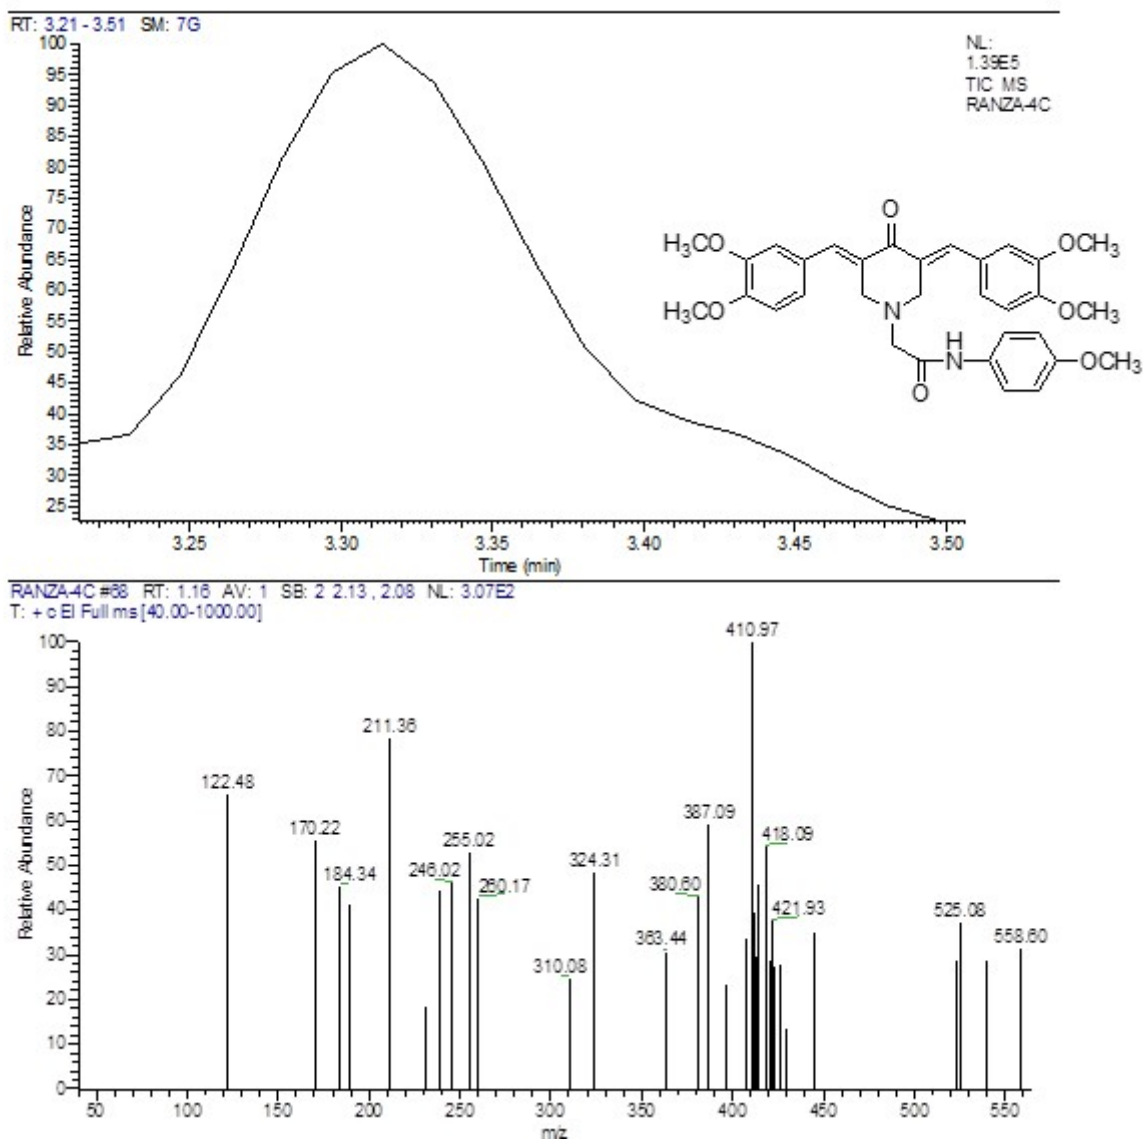

Figure S70. Mass spectrum of compound 4l

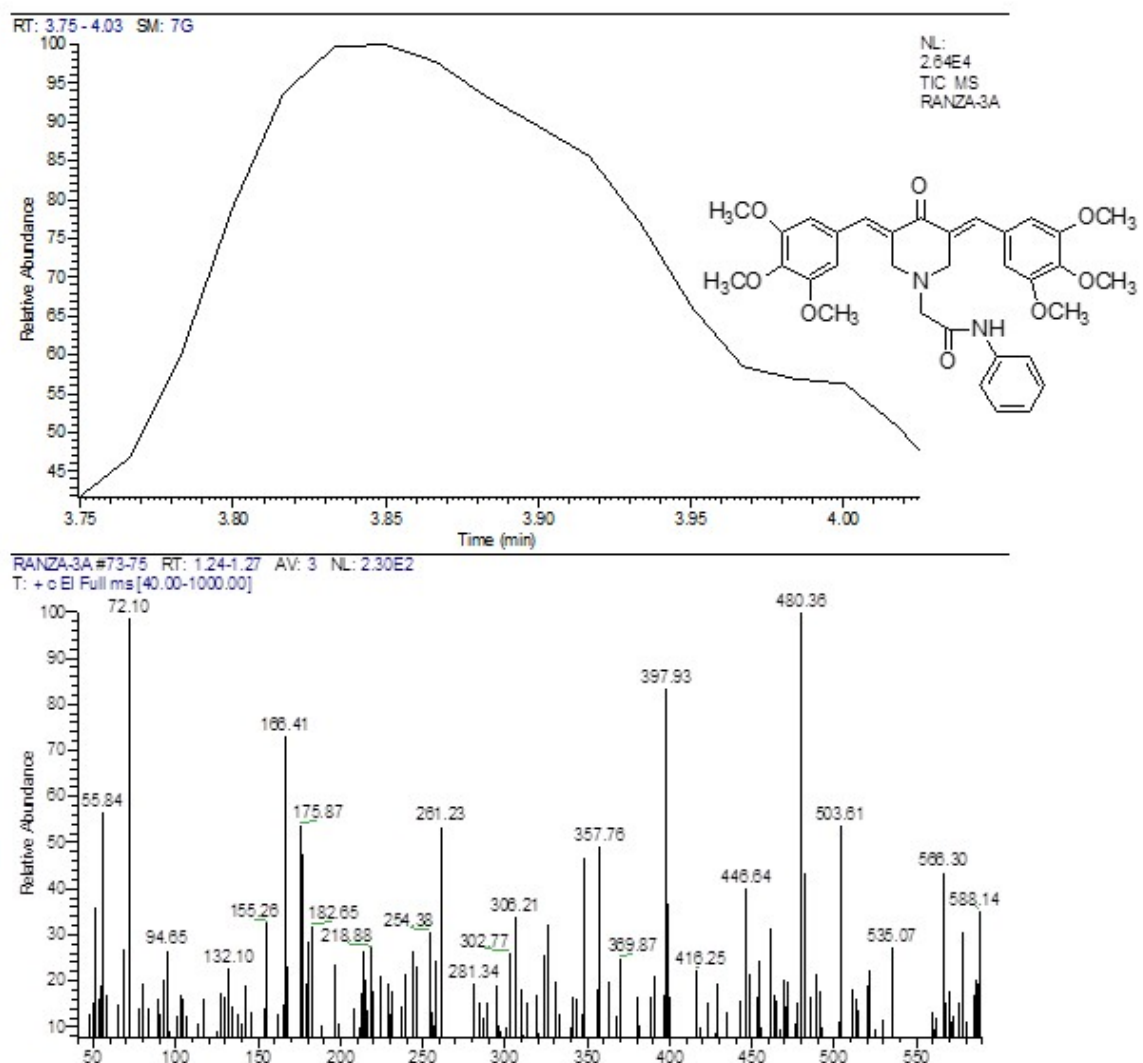

Figure S71. Mass spectrum of compound 4m

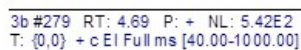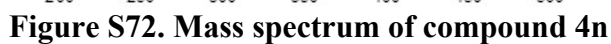

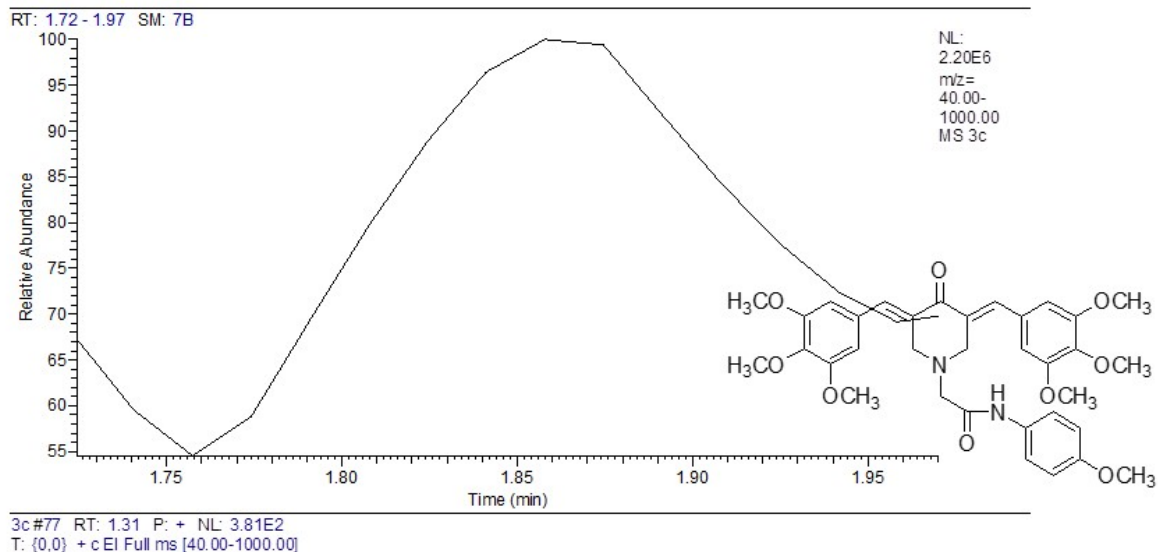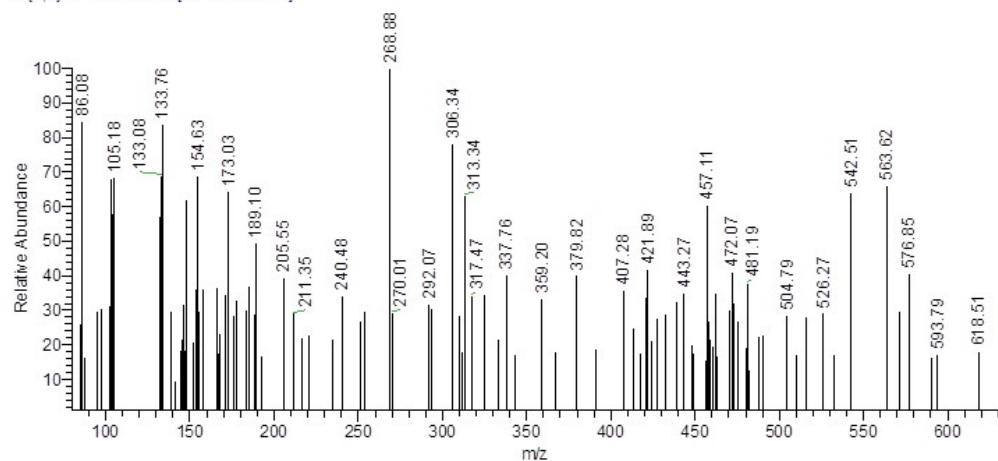

Figure S73. Mass spectrum of compound 40

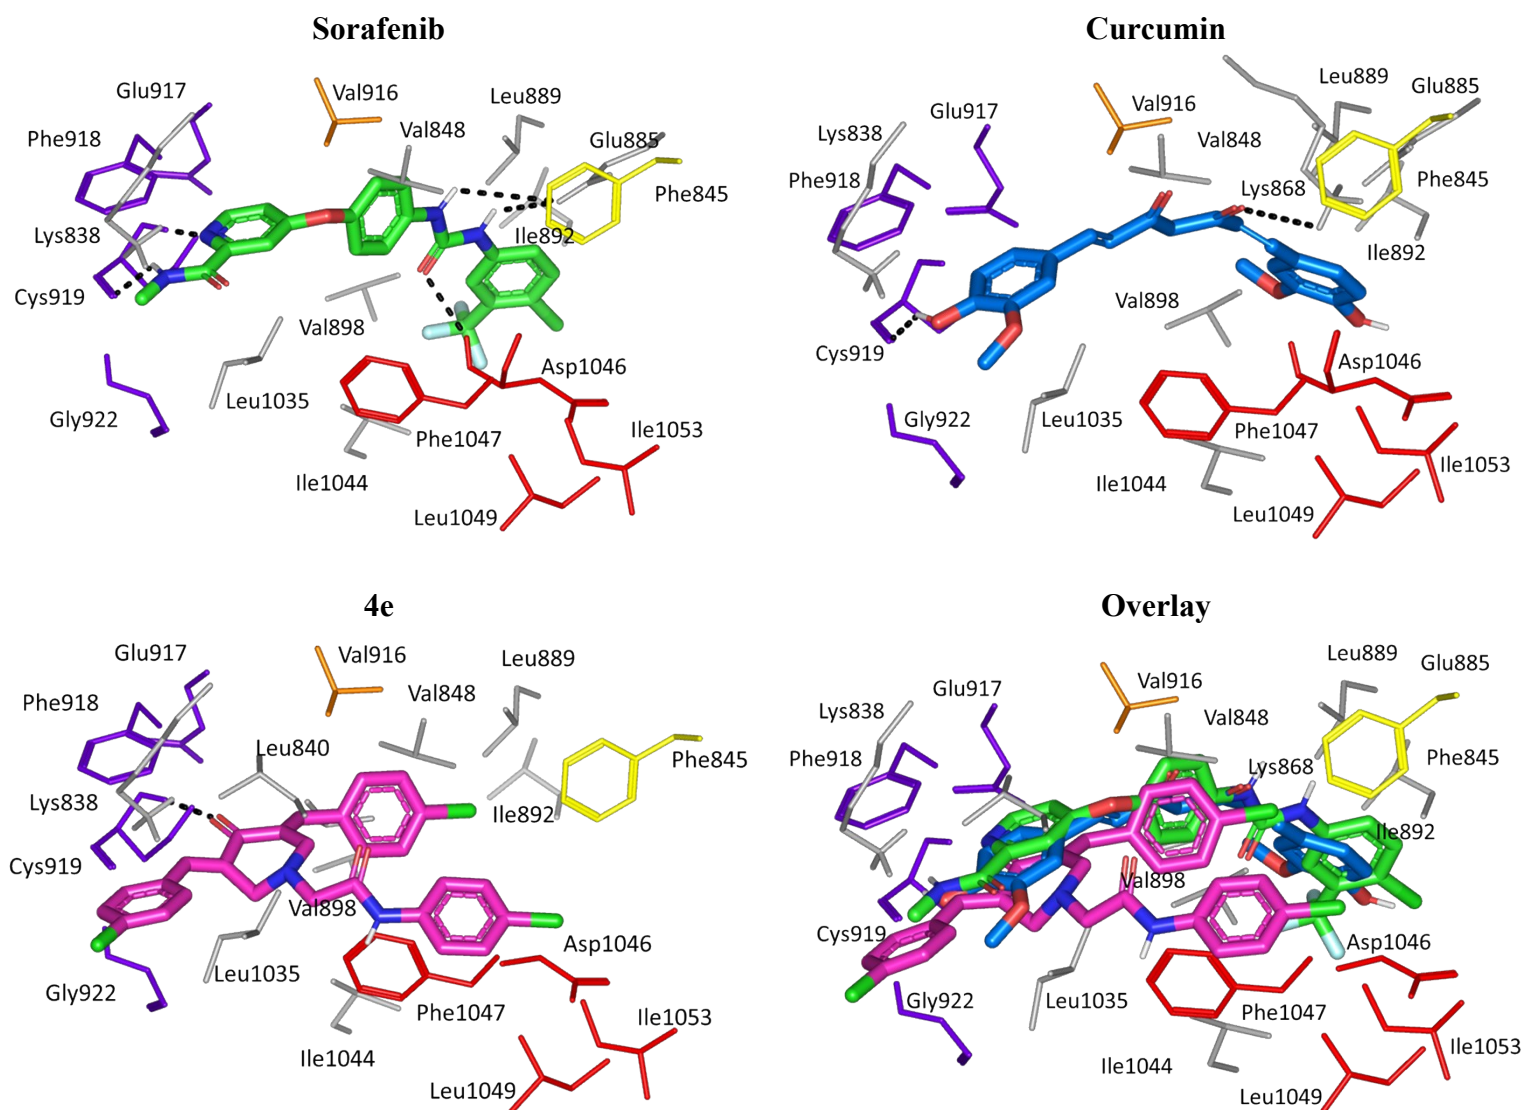

**Figure S74. Docked binding modes and interactions for top-docked compound, sorafenib, and curcumin parent compound within VEGFR2 ATP-binding site and kinase site. (A)** Binding modes and overlay of docked 4e (magenta sticks), co-crystallized ligand (sorafenib; green sticks), and curcumin (blue sticks) at VEGFR2 inactive state (PDB; 2OH4). Residues (lines) within a radius of 5 Å from the bounded ligands are displayed, labelled with sequence number, and coloured in regard to their position at the structural loops; A-loop (red), hinge region (purple), catalytic loop (blue), and glycine-rich loop (yellow). Black dashed lines represent the depicted polar ligand-VEGFR2 interactions.



## MCF-7

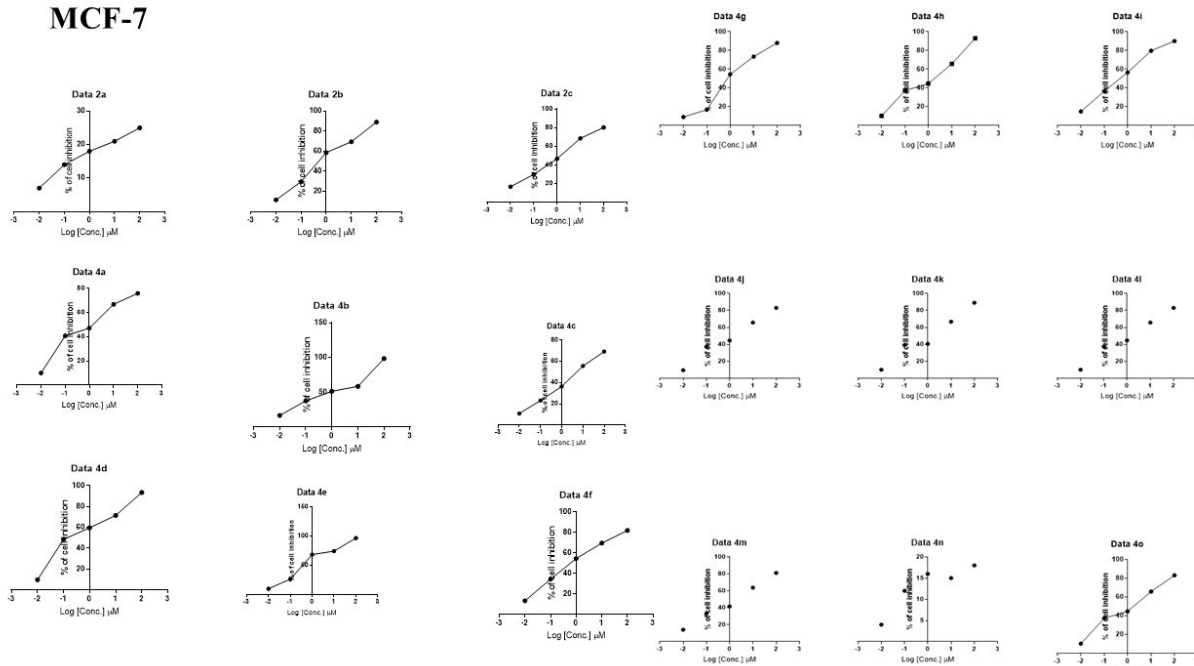

Figure S75. IC<sub>50</sub> curves for all compounds on MCF-7 cell line.

## HepG2

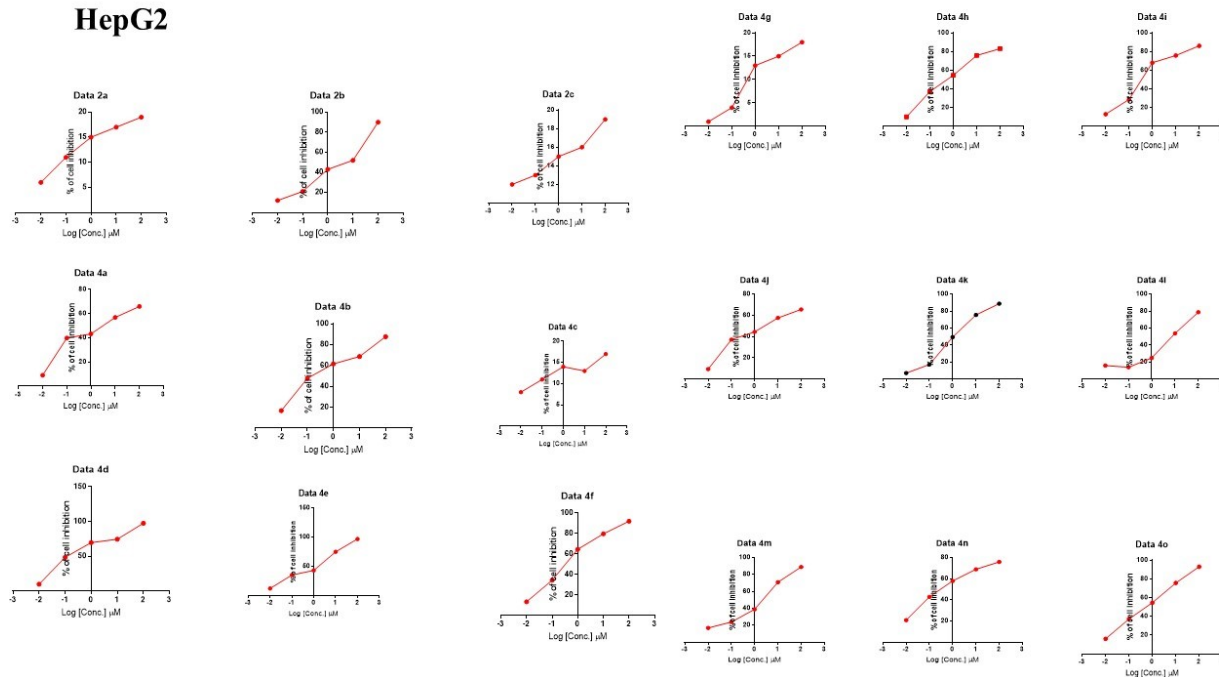

Figure S76. IC<sub>50</sub> curves for all compounds on HepG2 cell line.

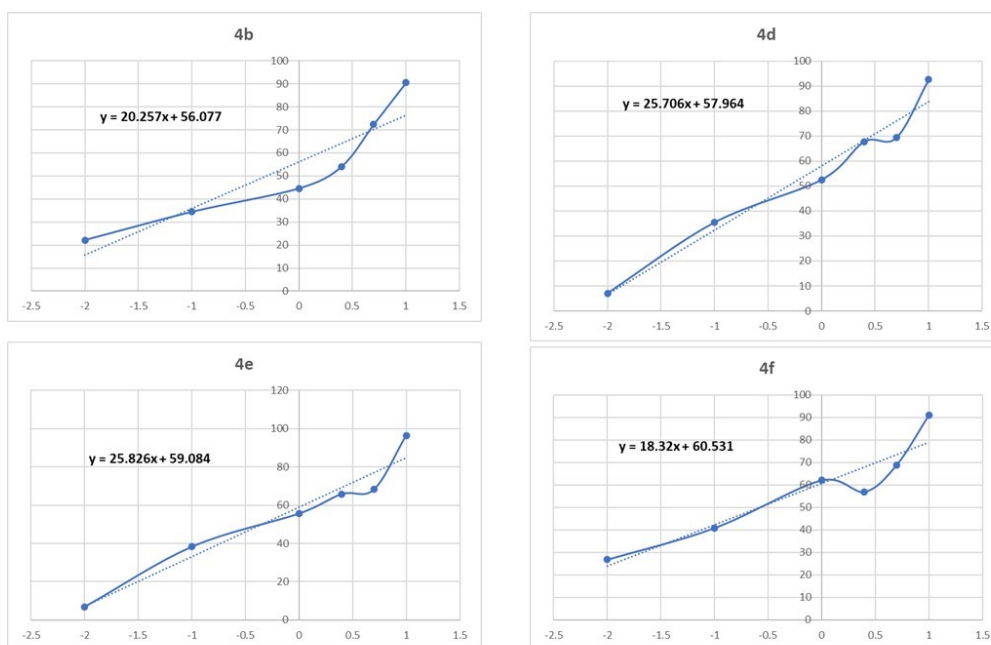

**Figure S77.** VEGFR2 Enzyme inhibition curves for compounds **4b** and **4d-f**.

## VEGFR2

### VEGFR2 Enzyme inhibition

ΔT=30 min

| Compound d [μM] | Cont.    | 10       | 5        | 2.5      | 1        | 0.1      | 0.01     |
|-----------------|----------|----------|----------|----------|----------|----------|----------|
| <b>4b</b>       | 0.651    | 0.012    | 0.19     | 0.289    | 0.358    | 0.446    | 0.493    |
|                 | 0.642    | 0.084    | 0.17     | 0.297    | 0.341    | 0.416    | 0.48     |
|                 | 0.628    | 0.066    | 0.17     | 0.296    | 0.365    | 0.398    | 0.523    |
| Mean            | 0.640333 | 0.060667 | 0.176667 | 0.294    | 0.354667 | 0.42     | 0.498667 |
| SD              | 0.01159  | 0.042158 | 0.011547 | 0.004359 | 0.012342 | 0.024249 | 0.022053 |
| % of validity   | 100      | 9.474232 | 27.5898  | 45.91359 | 55.38782 | 65.59084 | 77.87611 |
| % of inhibition | 0        | 90.52577 | 72.4102  | 54.08641 | 44.61218 | 34.40916 | 22.12389 |

Sorafenib  
b=29.7  
nM

IC50= 27.5 nM±1.1

ΔT=30 min

| Compound d [μM] | Cont.    | 10       | 5        | 2.5      | 1        | 0.1      | 0.01     |
|-----------------|----------|----------|----------|----------|----------|----------|----------|
| <b>4d</b>       | 0.651    | 0.037    | 0.199    | 0.201    | 0.301    | 0.399    | 0.599    |
|                 | 0.642    | 0.038    | 0.189    | 0.203    | 0.299    | 0.413    | 0.591    |
|                 | 0.628    | 0.068    | 0.201    | 0.216    | 0.312    | 0.429    | 0.596    |
| Mean            | 0.640333 | 0.047667 | 0.196333 | 0.206667 | 0.304    | 0.413667 | 0.595333 |
| SD              | 0.01159  | 0.017616 | 0.006429 | 0.008145 | 0.007    | 0.015011 | 0.004041 |
| % of validity   | 100      | 7.44404  | 30.66111 | 32.27486 | 47.47527 | 64.60177 | 92.97241 |
| % of inhibition | 0        | 92.55596 | 69.33889 | 67.72514 | 52.52473 | 35.39823 | 7.02759  |

IC50= 19.8 nM±0.7

ΔT=30 min

| Compound d [μM] | Cont.    | 10       | 5        | 2.5      | 1        | 0.1      | 0.01     |
|-----------------|----------|----------|----------|----------|----------|----------|----------|
| <b>4e</b>       | 0.651    | 0.015    | 0.202    | 0.215    | 0.248    | 0.401    | 0.559    |
|                 | 0.642    | 0.024    | 0.21     | 0.217    | 0.304    | 0.399    | 0.6      |
|                 | 0.628    | 0.029    | 0.199    | 0.225    | 0.301    | 0.386    | 0.63     |
| Mean            | 0.640333 | 0.022667 | 0.203667 | 0.219    | 0.284333 | 0.395333 | 0.596333 |
| SD              | 0.01159  | 0.007095 | 0.005686 | 0.005292 | 0.031501 | 0.008145 | 0.035642 |
| % of validity   | 100      | 3.539823 | 31.80635 | 34.20094 | 44.40396 | 61.73868 | 93.12858 |
| % of inhibition | 0        | 96.46018 | 68.19365 | 65.79906 | 55.59604 | 38.26132 | 6.871421 |

IC50= 11.6 nM±0.63

ΔT=30 min

| Compound d [μM] | Cont.    | 10       | 5        | 2.5      | 1        | 0.1      | 0.01     |
|-----------------|----------|----------|----------|----------|----------|----------|----------|
| <b>4f</b>       | 0.651    | 0.041    | 0.201    | 0.281    | 0.259    | 0.382    | 0.486    |
|                 | 0.642    | 0.019    | 0.199    | 0.279    | 0.261    | 0.379    | 0.496    |
|                 | 0.628    | 0.114    | 0.198    | 0.267    | 0.208    | 0.374    | 0.423    |
| Mean            | 0.640333 | 0.058    | 0.199333 | 0.275667 | 0.242667 | 0.378333 | 0.468333 |
| SD              | 0.01159  | 0.049729 | 0.001528 | 0.007572 | 0.030039 | 0.004041 | 0.039577 |
| % of validity   | 100      | 9.057782 | 31.12962 | 43.05049 | 37.89693 | 59.08381 | 73.13899 |
| % of inhibition | 0        | 90.94222 | 68.87038 | 56.94951 | 62.10307 | 40.91619 | 26.86101 |

IC50= 21.9 nM±1.1

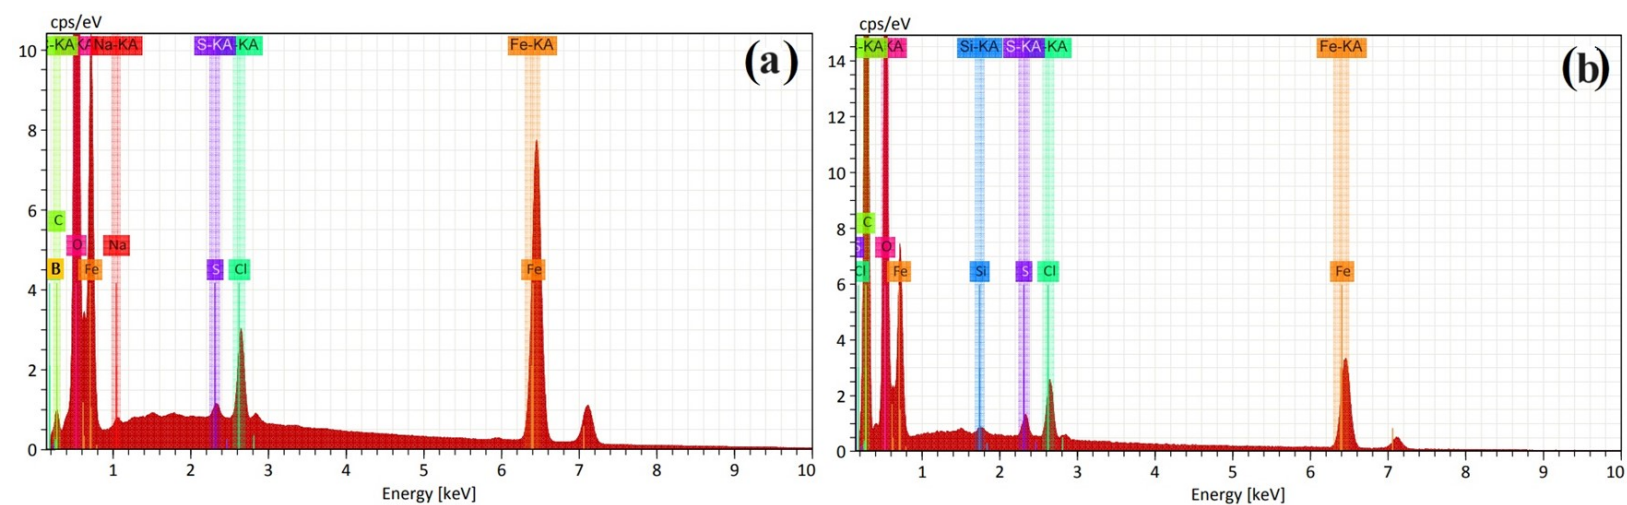

**Figure S78.** Elemental analysis of the synthesized iron oxide nanocomposite; where (a) EDX of  $\text{Fe}_2\text{O}_3$  NPs-B, and (b) EDX of  $\text{Fe}_2\text{O}_3$  NPs-HA.
